# Supplementary material for: Global analysis of human-to-mouse contact-dependent intercellular mRNA and lncRNA transfer in cell culture
Source: bioRxiv preprint, doi:10.1101/2021.11.28.470233, version 2 (2022-03-07)
Supplement: Supplementary Data File 3 [file 470233_file05.xlsx]

## Sheet: Sheet1
Gene ID	Mouse_ Cocul_1 (RPM)	Mouse_Cocul_2 (RPM)	Mouse_Mix_1 (RPM)	Mouse_Mix_2 (RPM)	FC	log2FC
EEF1A1	12684.8	6377.37	2515.18	3149.49	3.36509	1.75065
MT-CO1	10371.7	7894.89	6584.45	7425.23	1.30386	0.382787
MT-RNR2	8665.67	5861.2	5202.87	5409.71	1.36884	0.452949
KRT8	6963.71	4307.29	1778.96	2233.2	2.80921	1.49016
MT-ND4	6246.01	4621.3	4340.34	4852.37	1.18217	0.241432
MT-CO2	4775.76	3412.41	3355.12	3880.51	1.13165	0.178422
KRT18	4119.58	2548.52	1022.19	1296.08	2.87633	1.52423
PABPC1	3902.22	2080.87	841.988	1072.22	3.12563	1.64415
MT-CO3	3865.31	2950.14	2720.54	3010.54	1.18921	0.25
EEF2	3408.03	1593	593.499	737.196	3.75821	1.91004
CSDE1	3408.03	1845.02	748.548	959.513	3.07545	1.6208
MT-ND5	3094.3	2361.19	2420.2	2806.75	1.04372	0.0617386
MT-CYB	3092.25	2168.47	2145.53	2389.91	1.15991	0.214018
ACTG1	2961.01	1975.75	841.988	1087.65	2.55838	1.35523
ACTB	2956.91	2110.52	931.834	1176.43	2.40361	1.2652
FLNA	2790.81	1661.73	737.253	954.882	2.63132	1.39579
EIF4G2	2766.21	2339.63	984.202	1065.27	2.4913	1.3169
RPLP0	2632.92	1371.97	570.395	688.565	3.18111	1.66953
FTH1	2606.26	1784.37	791.161	956.425	2.5124	1.32907
GAPDH	2546.8	2055.26	873.819	1051.37	2.39044	1.25728
RPL8	2185.9	1280.33	539.591	658.459	2.89322	1.53268
COL3A1	2175.65	707.549	264.918	279.44	5.2965	2.40504
RPL13	2079.27	885.447	337.309	450.037	3.76546	1.91282
PKM	2036.21	1626.69	713.636	908.566	2.25798	1.17503
RPS2	1939.83	1184.64	495.438	633.757	2.76699	1.46832
HNRNPA3	1929.58	1727.77	1225.5	1353.2	1.41829	0.504151
MT-ATP6	1876.26	1475.74	1295.84	1468.22	1.21271	0.278238
HNRNPA2B1	1808.6	1513.48	787.053	889.267	1.98177	0.986787
HSP90AB1	1738.88	1216.98	526.756	678.529	2.45242	1.2942
DDX3X	1701.97	1504.05	663.322	643.792	2.45274	1.29439
DDX5	1673.26	1099.73	659.215	802.039	1.89768	0.924236
GNAS	1636.35	824.8	317.286	424.563	3.31759	1.73013
RPL13A	1624.04	916.444	361.439	412.984	3.28049	1.71391
RPL7A	1619.94	828.843	361.439	440.774	3.05254	1.61001
RPS3	1605.59	916.444	350.657	463.16	3.09902	1.63181
RPL3	1597.39	742.589	287.508	375.16	3.53115	1.82014
RPS18	1550.22	822.104	302.91	386.739	3.43991	1.78237
MALAT1	1527.67	650.945	303.937	397.546	3.10573	1.63493
RPL4	1527.67	943.398	367.086	466.248	2.96528	1.56817
AHNAK	1511.26	719.678	346.036	361.265	3.15416	1.65726
RPL10	1470.25	731.807	293.669	353.545	3.40237	1.76654
TPT1	1425.14	663.074	288.021	318.808	3.44119	1.78291
HSP90AA1	1423.09	1000	441.017	598.248	2.33154	1.22129
HNRNPK	1412.84	1119.95	573.989	687.793	2.00731	1.00526
MT-ND2	1396.43	1025.61	1101.26	1202.67	1.05126	0.072126
CLTC	1390.28	818.061	342.956	432.283	2.8486	1.51025
XBP1	1371.83	591.645	222.819	284.071	3.87356	1.95366
MT-ND1	1353.37	1107.82	1075.07	1219.65	1.07254	0.101032
HNRNPA1	1326.71	943.398	401.484	521.827	2.45866	1.29787
RPL15	1306.21	661.726	281.861	318.037	3.28045	1.71389
HNRNPU	1302.11	1037.74	561.668	618.319	1.98294	0.987643
RPS6	1295.95	669.813	281.347	350.458	3.11135	1.63754
EIF4B	1293.9	601.079	225.899	301.826	3.59085	1.84433
HSPA8	1293.9	1130.73	473.361	633.757	2.19004	1.13096
TFF1	1199.58	606.47	242.328	314.949	3.24085	1.69637
RACK1	1181.12	660.379	253.11	269.405	3.52431	1.81734
FTL	1168.82	1206.2	619.169	565.055	2.00555	1.004
RPS8	1092.95	529.651	219.738	322.668	2.99148	1.58086
RPL6	1080.65	592.993	246.435	328.072	2.91317	1.54259
SRRM2	1078.6	530.998	223.846	269.405	3.26324	1.7063
NPM1	1076.54	654.988	291.615	335.019	2.76323	1.46635
ENO1	1031.43	908.358	444.611	490.178	2.07511	1.05319
TRIM37	1000.67	444.745	162.237	226.948	3.71396	1.89296
RPL32	998.623	439.354	187.907	246.247	3.31214	1.72776
RPL30	998.623	529.651	212.037	269.405	3.17437	1.66647
RPS3A	990.421	477.09	206.39	242.387	3.27002	1.7093
HNRNPH1	984.27	688.681	512.38	501.757	1.64963	0.722142
RPLP1	982.219	659.031	262.351	328.072	2.77979	1.47497
EIF1	974.017	836.929	482.603	521.827	1.80296	0.850367
RPS14	971.966	632.077	236.167	315.721	2.90646	1.53927
UBE2D3	971.966	811.322	400.971	382.879	2.27504	1.18589
TUBA1B	953.511	854.449	422.534	487.09	1.98759	0.991021
SLC7A5	949.41	669.813	296.236	356.633	2.48016	1.31044
YWHAZ	945.309	619.947	275.186	338.879	2.54901	1.34994
PPIA	943.258	614.556	273.646	345.054	2.51788	1.33221
PSMD6	941.208	505.392	240.788	289.475	2.72808	1.44789
TMSB4X	937.107	526.955	240.788	304.914	2.6829	1.42379
YBX1	933.005	707.549	302.397	402.177	2.32843	1.21936
RPL37	916.601	438.006	176.099	220.773	3.41321	1.77113
H3-3B	896.095	469.004	230.52	260.913	2.77779	1.47394
PTMA	871.489	536.389	209.984	265.545	2.96066	1.56592
NQO1	869.438	611.861	280.834	324.212	2.44824	1.29175
ANXA2	865.337	812.67	361.952	391.37	2.22748	1.15541
RPS19	857.135	532.346	227.953	274.808	2.7637	1.4666
ATP5F1B	857.135	553.909	241.815	304.914	2.58089	1.36787
RPL7	857.135	563.343	214.091	289.475	2.82084	1.49612
AARS1	853.034	363.882	139.647	176.001	3.8553	1.94684
STC2	840.73	339.623	113.976	168.281	4.18183	2.06413
GATA3	840.73	376.012	141.187	198.387	3.58314	1.84123
RPS5	836.629	424.529	197.148	220.001	3.02328	1.59611
MT-RNR1	828.427	475.742	421.507	551.16	1.34082	0.423112
SCD	822.275	501.349	234.627	248.563	2.73935	1.45383
RPL18A	816.123	396.227	147.861	186.808	3.62254	1.857
TMBIM6	814.073	464.961	211.01	240.843	2.83064	1.50113
HUWE1	809.972	439.354	231.547	255.51	2.56505	1.35899
RPS16	809.972	510.783	235.654	308.001	2.4294	1.2806
EIF5	801.77	865.231	434.343	419.932	1.95136	0.964483
RPL10A	799.719	323.451	130.919	158.246	3.88418	1.95761
RPS23	777.163	396.227	172.505	206.878	3.09289	1.62896
RPL12	773.062	467.656	167.371	194.527	3.42836	1.77752
NUCKS1	771.011	377.359	165.317	193.755	3.19816	1.67724
RPL41	758.708	402.966	182.773	192.211	3.09793	1.6313
HDLBP	758.708	402.966	181.233	216.141	2.92338	1.54763
NCL	758.708	580.864	262.351	308.001	2.34867	1.23185
RPL11	756.657	381.402	157.103	199.159	3.19445	1.67557
RPS11	756.657	412.4	195.095	227.72	2.76494	1.46725
RPS25	744.354	402.966	146.321	206.106	3.25548	1.70287
SLC25A5	742.303	471.699	196.122	277.124	2.56527	1.35911
G6PD	736.152	698.115	336.282	399.861	1.94835	0.962254
HSPD1	732.05	501.349	221.792	302.598	2.35207	1.23393
CCND1	721.798	392.184	158.643	231.58	2.85473	1.51336
RPSA	721.798	501.349	196.635	281.756	2.55679	1.35434
MT-ND4L	711.545	556.605	515.461	540.353	1.20111	0.264369
EIF4A2	705.393	483.828	191.501	205.334	2.99676	1.58341
HMGB1	701.292	552.562	354.251	423.019	1.61315	0.689881
HSPB1	699.241	351.753	127.325	147.439	3.82508	1.93549
PPP3CA	697.191	309.974	110.896	164.422	3.65819	1.87113
NCOA3	695.14	343.666	124.758	147.439	3.81638	1.9322
PSAP	684.888	475.742	177.125	212.282	2.9805	1.57556
RPL23A	680.786	398.923	158.129	222.317	2.83801	1.50488
FASN	672.584	416.443	182.773	215.369	2.73527	1.45168
RPS24	668.483	343.666	177.125	182.948	2.81095	1.49106
RPL14	662.331	370.621	158.129	181.404	3.04227	1.60515
PRDX1	658.23	458.222	224.359	266.317	2.27534	1.18608
TPI1	647.977	487.872	235.141	274.036	2.23076	1.15753
APLP2	641.826	297.844	140.674	160.562	3.11938	1.64126
RPS4X	641.826	369.273	145.294	181.404	3.0949	1.62989
XPOT	637.725	283.019	113.463	115.018	4.02985	2.01073
RPL5	637.725	328.842	148.375	145.895	3.28462	1.71573
RPS27A	637.725	346.362	152.482	189.124	2.88077	1.52645
NUMA1	635.674	250.674	87.2792	110.386	4.48408	2.16481
CANX	635.674	407.009	142.727	196.843	3.0706	1.61852
EIF4G1	631.573	421.834	201.769	272.492	2.22115	1.15131
SPTSSB	627.472	336.928	138.107	205.334	2.80805	1.48957
RPL18	627.472	340.971	145.294	210.738	2.7201	1.44366
ATP1A1	623.371	370.621	167.371	202.247	2.68924	1.4272
RPL37A	623.371	436.659	166.857	208.422	2.82464	1.49807
SET	621.32	330.189	162.237	196.071	2.65556	1.40902
MT-ND3	621.32	384.098	374.787	403.721	1.29147	0.369011
TPM4	621.32	389.489	152.995	203.018	2.83924	1.5055
P4HB	619.27	382.75	153.509	191.439	2.90484	1.53846
MAT2A	613.118	433.963	198.175	229.264	2.44966	1.29258
RPS7	611.067	404.313	157.103	191.439	2.91322	1.54262
SLC38A1	609.017	264.151	105.762	116.562	3.92746	1.9736
RAN	606.966	490.567	204.336	240.071	2.46966	1.30431
DSCAM-AS1	600.815	202.157	79.5781	76.4214	5.14727	2.36381
CFL1	600.815	448.788	180.206	242.387	2.48372	1.3125
EIF3B	592.612	299.192	132.972	216.141	2.55448	1.35303
ACTN4	592.612	396.227	209.984	231.58	2.2394	1.16312
RPL19	590.562	462.265	186.367	202.247	2.70919	1.43786
RPS12	582.359	359.839	128.865	176.001	3.09053	1.62786
ALDH1A1	582.359	725.069	388.649	350.458	1.76893	0.822877
RPL28	580.309	327.494	119.11	174.457	3.09231	1.62869
CALR	580.309	351.753	139.647	166.738	3.04213	1.60508
CDH1	578.258	270.89	122.191	149.755	3.12249	1.6427
KRT19	576.208	324.799	127.325	164.422	3.08832	1.62682
HSP90B1	572.107	374.664	161.723	209.194	2.55251	1.35192
PTPRF	555.702	265.499	104.735	104.983	3.91574	1.96929
MATR3	553.652	388.141	244.382	243.159	1.93172	0.949886
SYTL2	551.601	269.542	106.275	155.159	3.14092	1.65119
SLC25A3	549.55	315.365	150.942	198.387	2.47594	1.30797
CNBP	549.55	388.141	150.428	177.545	2.85905	1.51554
RPS9	547.5	300.54	132.972	144.352	3.05794	1.61256
PREX1	545.449	225.068	75.4709	90.3162	4.64763	2.2165
ESR1	543.399	180.593	89.3329	90.3162	4.03004	2.01079
NONO	543.399	280.324	136.566	157.474	2.80139	1.48614
RPS6KB1	539.298	289.758	162.75	175.229	2.45298	1.29454
RPL24	535.197	254.717	101.655	132.773	3.36955	1.75256
PFN1	533.146	444.745	234.114	266.317	1.9541	0.966503
H2AZ1	531.095	423.181	183.8	247.019	2.21503	1.14733
HIPK1	529.045	260.108	105.762	131.229	3.32989	1.73548
EIF3A	529.045	277.629	122.704	140.492	3.06491	1.61585
NAP1L1	529.045	297.844	126.298	143.58	3.06394	1.61539
MYL12B	524.944	274.933	133.486	169.825	2.63715	1.39898
SLC9A3R1	522.893	231.806	91.3865	141.264	3.24392	1.69774
DYNC1H1	518.792	234.502	110.896	151.299	2.87303	1.52257
SNRNP200	518.792	269.542	124.245	130.457	3.09513	1.63
SLC3A2	518.792	330.189	148.888	171.369	2.65094	1.4065
TXNRD1	514.691	454.179	233.087	257.054	1.97672	0.983107
UBA1	512.64	266.847	119.11	144.352	2.95863	1.56493
RPL29	508.539	254.717	110.383	151.299	2.91674	1.54436
IGFBP4	506.489	386.793	177.125	182.948	2.48083	1.31082
CTTN	504.438	291.106	120.651	173.685	2.70285	1.43448
SLC38A2	502.388	216.982	96.5206	98.8075	3.68288	1.88083
HNRNPUL1	502.388	281.672	110.896	142.036	3.09989	1.63221
SERBP1	500.337	254.717	131.432	162.106	2.57225	1.36303
APP	500.337	327.494	127.838	124.281	3.28348	1.71523
GANAB	498.286	249.327	109.869	133.544	3.07137	1.61888
RPL27A	498.286	268.195	112.95	151.299	2.90061	1.53635
EIF3E	494.185	235.85	91.8999	113.474	3.55466	1.82971
HDGF	492.135	289.758	129.892	165.194	2.64971	1.40584
SF3B3	490.084	280.324	118.084	167.51	2.69757	1.43166
MYOF	483.933	293.801	120.137	152.843	2.84905	1.51048
RPS27	479.831	245.284	108.329	148.211	2.82652	1.49903
CLU	479.831	295.149	136.566	156.702	2.64256	1.40194
SYNCRIP	479.831	309.974	157.103	184.492	2.31211	1.20921
HNRNPC	477.781	338.276	133.999	169.053	2.69279	1.4291
RPL21	473.68	288.41	111.409	138.948	3.04401	1.60597
MYH9	473.68	335.58	120.651	163.65	2.84649	1.50919
TKT	473.68	349.057	188.934	204.562	2.09084	1.06408
SARS1	469.579	198.114	68.7966	71.0179	4.77556	2.25567
KPNB1	469.579	397.575	157.103	212.282	2.34756	1.23116
USP32	467.528	211.591	81.6318	115.018	3.45344	1.78804
BTF3	467.528	274.933	111.409	115.018	3.27902	1.71327
FLNB	467.528	277.629	128.352	148.983	2.68685	1.42591
HSPA9	467.528	314.017	141.7	176.001	2.46	1.29866
RPL31	461.376	300.54	111.923	138.948	3.03709	1.60269
MRFAP1	457.275	269.542	113.976	142.808	2.83046	1.50104
PLEC	457.275	357.144	153.509	169.825	2.51882	1.33275
DSTN	455.225	266.847	128.865	139.72	2.68843	1.42676
TRIM28	455.225	378.707	176.099	206.878	2.1775	1.12267
CNOT1	453.174	195.418	94.9803	112.702	3.123	1.64293
LDHA	453.174	412.4	221.279	225.405	1.93778	0.954405
GAS5	451.124	136.119	60.0686	77.9653	4.25433	2.08893
HMGN1	449.073	188.68	96.5206	97.2636	3.29105	1.71855
ZFP36L2	449.073	198.114	73.4172	90.3162	3.95268	1.98283
UBC	449.073	270.89	116.543	142.808	2.77602	1.47302
ILF3	449.073	297.844	129.379	161.334	2.56926	1.36135
TUBA1C	444.972	365.23	165.831	228.492	2.05467	1.0389
NEAT1	442.921	168.464	62.1223	82.5969	4.22463	2.07883
STARD10	442.921	230.459	87.7926	142.808	2.92012	1.54603
CERS2	440.871	208.895	94.9803	119.65	3.02738	1.59807
CD63	440.871	283.019	117.57	148.211	2.72363	1.44553
RPL23	440.871	299.192	111.409	136.632	2.98362	1.57707
DDB1	438.82	254.717	117.057	142.036	2.67679	1.42051
PRKDC	438.82	265.499	124.245	121.194	2.86964	1.52087
HNRNPD	438.82	339.623	182.773	258.598	1.7637	0.818602
HNRNPM	434.719	339.623	137.08	155.159	2.64969	1.40583
RBMX	430.618	250.674	112.436	124.281	2.87808	1.52511
FUS	428.567	225.068	118.597	115.79	2.7887	1.47959
EWSR1	426.517	256.065	134.513	167.51	2.26004	1.17635
HSPA5	426.517	283.019	115.517	145.895	2.71424	1.44055
ATP2A2	426.517	331.537	156.076	165.194	2.35956	1.23852
CD47	424.466	152.291	58.015	73.3337	4.39104	2.13456
RPL39	424.466	211.591	106.275	127.369	2.72233	1.44484
AGR2	424.466	225.068	87.7926	135.86	2.90421	1.53814
SRSF10	424.466	365.23	207.93	202.247	1.92526	0.945053
PTGES3	422.416	268.195	112.95	166.738	2.46922	1.30406
PRPF8	418.315	245.284	109.869	136.632	2.69207	1.42871
LARP1	416.264	210.243	78.0379	128.141	3.03866	1.60343
MTDH	416.264	253.37	116.03	113.474	2.91774	1.54485
CDV3	412.163	175.203	71.3636	100.351	3.42058	1.77424
RPL35	412.163	238.545	98.5742	125.825	2.89978	1.53594
RHOA	412.163	295.149	124.758	159.79	2.48574	1.31367
FHL1	412.163	385.446	101.655	90.3162	4.15484	2.05479
EIF2S3	410.112	198.114	86.7658	99.5794	3.26397	1.70663
CALM1	410.112	283.019	125.271	166.738	2.37367	1.24712
PIEZO1	408.062	188.68	85.739	120.422	2.89455	1.53334
HMGN2	408.062	192.723	106.275	124.281	2.6058	1.38173
APPBP2	408.062	206.2	85.739	116.562	3.03638	1.60235
MYL6	408.062	237.197	109.869	141.264	2.56939	1.36143
KIAA0100	403.961	216.982	86.7658	99.5794	3.33221	1.73648
RAC1	403.961	250.674	83.172	100.351	3.56704	1.83473
RPS15	403.961	254.717	99.601	118.878	3.01484	1.59208
RPS13	401.91	192.723	94.4669	108.071	2.93591	1.55381
RAB7A	401.91	212.938	97.5474	117.334	2.86134	1.51669
HNRNPF	401.91	254.717	101.141	132.773	2.80714	1.4891
CCT3	401.91	262.804	120.137	145.895	2.49862	1.32113
KPNA2	399.859	264.151	109.356	129.685	2.77782	1.47395
KIF1C	399.859	334.232	71.877	71.7898	5.10968	2.35323
GSE1	397.809	176.55	73.9306	118.106	2.99089	1.58057
YWHAB	397.809	211.591	90.3597	121.965	2.87012	1.52111
KRT80	397.809	246.631	92.4133	132.773	2.86181	1.51693
CAPRIN1	397.809	283.019	159.156	194.527	1.92497	0.944832
CDC42BPB	395.758	194.07	78.5513	94.1759	3.4148	1.7718
NRAS	395.758	202.157	85.2256	96.4917	3.29036	1.71825
EIF4H	395.758	237.197	104.735	118.878	2.83059	1.5011
CELF1	393.708	230.459	136.053	134.316	2.30857	1.207
FAM120A	389.607	199.461	82.6586	99.5794	3.23241	1.69261
PAPOLA	389.607	252.022	102.168	148.211	2.56263	1.35762
DDX17	387.556	152.291	69.31	96.4917	3.25598	1.70309
VCP	385.506	304.583	133.999	156.702	2.37387	1.24724
IARS1	383.455	156.335	74.4441	97.2636	3.14365	1.65244
PGK1	383.455	273.585	125.785	138.176	2.48916	1.31566
CENPB	383.455	278.976	84.1988	98.8075	3.61972	1.85588
IFI6	381.404	141.51	56.9882	56.3511	4.6137	2.20593
HNRNPH3	381.404	204.852	139.133	183.72	1.81586	0.860653
ADAR	379.354	183.289	78.0379	91.0881	3.32677	1.73412
PUM2	379.354	245.284	127.838	140.492	2.32787	1.21901
PTPN11	375.253	196.766	72.3904	96.4917	3.38709	1.76005
MARS1	371.152	157.682	73.4172	87.2285	3.29193	1.71893
MSI2	371.152	206.2	78.0379	91.0881	3.41374	1.77135
ANKRD11	371.152	207.548	70.8502	94.9478	3.49039	1.80339
RPL35A	367.051	163.073	77.5245	101.123	2.96742	1.56921
SFPQ	367.051	180.593	94.9803	102.667	2.77081	1.47031
PCBP2	365	179.246	80.0915	104.983	2.94068	1.55615
PGD	365	315.365	145.294	133.544	2.43999	1.28688
EEF1B2	362.949	187.332	96.5206	115.79	2.59187	1.37399
MTATP6P1	362.949	280.324	241.301	261.685	1.27891	0.354912
KRT7	362.949	524.26	277.753	238.527	1.71846	0.781119
ZNF664	360.899	156.335	71.877	82.5969	3.34835	1.74345
UBR5	360.899	163.073	59.5552	77.9653	3.81014	1.92984
AP2M1	360.899	190.027	99.0876	110.386	2.63004	1.39509
HNRNPAB	360.899	250.674	118.597	155.159	2.23401	1.15964
CCT7	360.899	250.674	128.865	147.439	2.2134	1.14627
SEPTIN9	358.848	218.329	97.5474	108.071	2.80704	1.48905
ANP32B	358.848	222.372	69.8234	95.7197	3.51099	1.81188
TOP2B	358.848	238.545	82.6586	91.0881	3.4383	1.7817
QKI	358.848	380.055	141.7	162.878	2.42599	1.27857
GRN	356.798	164.421	56.4748	64.8424	4.29633	2.1031
RPS29	356.798	167.116	76.4977	84.9127	3.24585	1.6986
PRRC2A	356.798	237.197	110.896	106.527	2.73198	1.44995
ITGB1	356.798	257.413	136.053	169.825	2.00802	1.00578
MCM7	354.747	264.151	92.4133	166.738	2.38818	1.25591
ATP5MC2	352.697	107.817	71.3636	85.6846	2.93231	1.55204
PPT1	352.697	184.636	73.4172	79.5091	3.51367	1.81298
CCNI	350.646	153.639	64.6893	75.6495	3.59334	1.84533
DSP	350.646	160.378	64.6893	81.8249	3.48788	1.80235
HNRNPR	350.646	252.022	141.7	132.001	2.20192	1.13876
MAZ	350.646	258.761	106.789	121.965	2.66402	1.41361
MAL2	346.545	142.857	58.5284	75.6495	3.64741	1.86687
BCAS3	346.545	149.596	71.3636	72.5617	3.44721	1.78543
PNN	346.545	243.936	114.49	125.825	2.45711	1.29696
SQSTM1	346.545	301.887	141.187	148.211	2.24062	1.1639
RPLP2	344.494	172.507	77.0111	108.843	2.78177	1.476
PLXNB2	344.494	173.855	58.5284	74.1056	3.90812	1.96647
STAT1	344.494	187.332	74.9575	71.7898	3.6241	1.85762
SLC1A5	344.494	223.72	86.2524	108.071	2.92407	1.54798
PPP1CC	344.494	235.85	165.831	180.632	1.67505	0.744207
RPS21	342.444	183.289	84.1988	118.106	2.59872	1.3778
CTNNA1	342.444	238.545	96.0072	108.843	2.83617	1.50394
CD164	340.393	161.725	69.8234	74.8775	3.47004	1.79495
LAPTM4B	340.393	173.855	82.1452	85.6846	3.06411	1.61547
MBTPS1	340.393	183.289	65.7161	81.8249	3.5494	1.82757
TRAF7	340.393	188.68	75.9843	95.7197	3.08131	1.62354
TSKU	340.393	212.938	82.1452	90.3162	3.20844	1.68187
UBB	338.343	200.809	103.195	115.79	2.46205	1.29986
PRRC2C	336.292	145.553	59.0418	68.7021	3.77196	1.91531
PPP2R1A	336.292	216.982	90.3597	108.071	2.78825	1.47936
OGT	334.242	153.639	62.1223	87.2285	3.26668	1.70782
MTHFD2	334.242	169.812	52.8809	54.0353	4.71447	2.23709
NMD3	334.242	171.159	57.5016	83.3688	3.5877	1.84306
ARPP19	334.242	172.507	74.9575	105.755	2.80417	1.48758
LRATD2	332.191	156.335	54.4212	86.4565	3.46773	1.79399
AGRN	332.191	167.116	74.9575	93.4039	2.96569	1.56837
MCL1	332.191	177.898	68.2832	92.632	3.16992	1.66445
SPINT2	332.191	199.461	73.4172	106.527	2.95454	1.56293
SF3B1	332.191	202.157	79.0647	93.4039	3.09823	1.63144
NORAD	332.191	203.504	70.8502	81.8249	3.50873	1.81095
BZW1	332.191	210.243	92.9267	101.123	2.79533	1.48302
FMR1	332.191	314.017	168.911	177.545	1.8652	0.899327
MED13	330.14	148.248	49.8005	60.2108	4.34854	2.12053
SMARCD2	330.14	153.639	61.6089	88.0004	3.23362	1.69315
EZR	330.14	215.634	78.5513	111.93	2.86523	1.51865
GSPT1	330.14	216.982	82.1452	121.965	2.68052	1.42251
PRRC2B	328.09	148.248	88.8195	106.527	2.43843	1.28595
TMED10	328.09	164.421	63.1491	94.1759	3.13053	1.64641
VMP1	328.09	225.068	89.8463	117.334	2.66994	1.41681
RPS20	328.09	245.284	93.9535	118.878	2.69403	1.42976
MORF4L1	326.039	136.119	66.2295	78.7372	3.18803	1.67266
RCC2	326.039	184.636	58.5284	75.6495	3.80596	1.92826
MKI67	326.039	187.332	92.4133	79.5091	2.98606	1.57824
IRAK1	326.039	198.114	98.5742	132.001	2.27324	1.18475
CCT2	326.039	234.502	110.383	144.352	2.2005	1.13783
TACSTD2	323.989	164.421	51.8541	72.5617	3.92562	1.97292
TOP2A	323.989	190.027	80.0915	71.0179	3.40162	1.76622
SETD5	323.989	207.548	113.976	117.334	2.29794	1.20034
NPNT	321.938	145.553	47.7469	70.2459	3.96203	1.98624
SULF2	321.938	163.073	64.6893	78.7372	3.3816	1.75771
SRSF3	321.938	250.674	110.383	118.878	2.49765	1.32057
AKR1B10	321.938	470.351	210.497	200.703	1.92678	0.946189
ATP5F1A	319.888	192.723	90.8731	111.158	2.53728	1.34328
DAZAP2	315.786	134.771	78.0379	77.1933	2.90249	1.53729
RSL1D1	313.736	154.987	70.3368	87.2285	2.97478	1.57279
LRPPRC	313.736	173.855	71.3636	88.7723	3.04486	1.60637
ERGIC1	313.736	175.203	78.0379	86.4565	2.97237	1.57161
SRSF2	313.736	230.459	107.302	149.755	2.11702	1.08203
ATF4	311.685	154.987	46.2067	74.8775	3.85411	1.9464
ZNF217	311.685	165.769	45.6932	68.7021	4.17372	2.06133
DHCR24	311.685	210.243	90.3597	136.632	2.29933	1.20121
CA12	311.685	225.068	106.275	98.0355	2.62714	1.39349
XRCC5	311.685	230.459	96.5206	117.334	2.53511	1.34205
KTN1	309.635	175.203	78.0379	91.8601	2.8537	1.51283
YWHAQ	309.635	241.24	95.4937	139.72	2.34202	1.22775
CALM2	309.635	250.674	100.628	106.527	2.70479	1.43552
TRIM33	307.584	130.728	51.8541	60.9827	3.88448	1.95772
KIAA1522	307.584	145.553	63.1491	64.8424	3.54037	1.8239
HECTD1	307.584	176.55	67.2563	87.2285	3.13386	1.64794
LMNA	307.584	200.809	102.168	105.755	2.4451	1.2899
SF3B2	307.584	214.286	86.2524	108.843	2.67495	1.41951
PSMD2	307.584	214.286	101.141	121.194	2.34723	1.23096
PCBP1	307.584	266.847	91.8999	97.2636	3.03669	1.6025
EEF1A2	305.534	185.984	71.3636	110.386	2.70436	1.43529
GCN1	305.534	185.984	83.6854	126.597	2.33742	1.22492
BCL9L	305.534	210.243	82.1452	106.527	2.73372	1.45087
EIF5A	305.534	315.365	130.919	143.58	2.26194	1.17756
SHMT2	303.483	99.7307	44.153	59.4389	3.89233	1.96063
IQGAP1	303.483	160.378	71.3636	78.7372	3.09033	1.62776
NACA	303.483	164.421	72.9038	94.9478	2.7876	1.47903
PRDX6	303.483	171.159	82.6586	98.8075	2.6156	1.38714
BSG	303.483	208.895	84.1988	103.439	2.73068	1.44926
TUG1	301.433	157.682	58.5284	68.7021	3.60853	1.85141
GNS	299.382	103.774	53.3944	70.2459	3.26072	1.70519
DDR1	299.382	133.423	51.8541	85.6846	3.14679	1.65388
SEPTIN2	299.382	184.636	88.306	85.6846	2.78186	1.47605
RPL27	299.382	196.766	87.2792	125.053	2.33666	1.22445
GSTM3	297.331	107.817	46.7201	67.9301	3.53378	1.82121
PTP4A2	297.331	191.375	64.6893	91.0881	3.13721	1.64948
SEC61A1	297.331	203.504	96.0072	145.123	2.07703	1.05452
RPL9	295.281	172.507	60.0686	74.1056	3.48642	1.80175
RBM39	295.281	177.898	97.034	118.878	2.19154	1.13194
DYNLL2	295.281	191.375	70.8502	94.1759	2.94896	1.56021
FKBP4	295.281	204.852	95.4937	109.615	2.43839	1.28593
TMSB10	295.281	230.459	122.191	142.036	1.98973	0.992572
ERBB3	293.23	109.165	45.6932	46.316	4.37342	2.12876
DKK1	293.23	165.769	68.2832	86.4565	2.96626	1.56865
SRSF9	293.23	172.507	72.9038	110.386	2.54098	1.34539
MORF4L2	293.23	185.984	64.1759	92.632	3.05606	1.61167
AKR1C2	293.23	324.799	187.394	172.913	1.71529	0.778449
TOB1	291.18	109.165	49.8005	40.9125	4.41331	2.14186
EIF3H	291.18	134.771	58.5284	57.1231	3.68306	1.8809
RHOB	291.18	138.814	46.7201	53.2634	4.30065	2.10456
PRKCSH	291.18	160.378	73.9306	87.2285	2.80194	1.48642
PEBP1	291.18	183.289	74.9575	98.0355	2.7427	1.4556
RNPS1	291.18	185.984	76.4977	76.4214	3.12037	1.64172
MT-ATP8	291.18	196.766	166.857	200.703	1.32753	0.408741
DDX21	291.18	202.157	86.7658	88.0004	2.82284	1.49715
ARHGEF12	289.129	136.119	66.7429	73.3337	3.03582	1.60209
NUP210	289.129	153.639	65.7161	84.1407	2.95461	1.56297
KARS1	289.129	161.725	68.7966	84.9127	2.93317	1.55246
RPN2	289.129	187.332	74.4441	99.5794	2.73791	1.45308
BMP7	289.129	191.375	93.9535	129.685	2.14858	1.10338
PPDPF	287.079	126.685	59.0418	61.7547	3.42529	1.77623
SERF2	287.079	171.159	67.2563	81.8249	3.07375	1.62
RPL38	287.079	181.941	79.0647	84.1407	2.8738	1.52296
HMGA1	287.079	184.636	73.4172	106.527	2.62145	1.39037
IPO7	287.079	185.984	75.4709	74.8775	3.14644	1.65372
USP34	287.079	190.027	83.172	115.018	2.40732	1.26743
PTBP1	287.079	229.111	90.8731	101.123	2.68854	1.42682
MYC	285.028	101.078	36.4519	44.0002	4.79921	2.2628
FOXA1	285.028	111.86	43.1262	53.2634	4.11754	2.04178
CD9	285.028	129.38	45.1798	63.2985	3.82019	1.93365
NOTCH2	285.028	138.814	52.3675	68.7021	3.50082	1.80769
APH1A	285.028	154.987	67.2563	81.053	2.96687	1.56894
ENSA	285.028	173.855	69.8234	106.527	2.60211	1.37968
EEF1D	285.028	214.286	61.0955	91.0881	3.281	1.71414
TTC3	282.977	111.86	41.0726	55.5792	4.08516	2.03039
SMARCA4	282.977	115.903	47.2335	62.5266	3.63411	1.8616
NUDT21	282.977	145.553	55.448	77.9653	3.21205	1.6835
ABAT	282.977	150.944	55.9614	81.053	3.16698	1.66311
NCOR2	282.977	157.682	61.6089	82.5969	3.05577	1.61154
RAB1B	282.977	191.375	64.1759	91.8601	3.04002	1.60408
S100A11	282.977	210.243	75.9843	90.3162	2.96584	1.56844
S100A10	282.977	233.154	109.356	121.194	2.2387	1.16266
SMG1	280.927	126.685	55.448	59.4389	3.54794	1.82698
TNRC18	280.927	130.728	67.7698	70.2459	2.98267	1.5766
PSMC5	280.927	142.857	68.2832	87.2285	2.7251	1.44631
L1CAM	280.927	167.116	59.5552	88.7723	3.02063	1.59485
ATXN2L	280.927	175.203	101.141	105.755	2.20463	1.14054
SNHG29	280.927	176.55	77.5245	90.3162	2.72566	1.44661
TPM3	280.927	212.938	90.8731	125.825	2.27905	1.18843
DHX15	280.927	214.286	127.838	107.299	2.10606	1.07455
DHX9	280.927	225.068	87.7926	107.299	2.59363	1.37497
MLEC	278.876	185.984	73.9306	91.0881	2.81702	1.49417
AZIN1	278.876	285.715	128.352	132.773	2.16215	1.11247
JPT2	276.826	140.162	62.1223	94.9478	2.65479	1.4086
INPPL1	276.826	144.205	56.9882	74.8775	3.19288	1.67486
PPM1G	276.826	173.855	64.1759	81.053	3.10324	1.63378
CSNK1A1	276.826	181.941	120.137	128.141	1.84779	0.885803
GDI2	276.826	190.027	73.9306	86.4565	2.91079	1.54141
STIP1	276.826	195.418	82.6586	118.878	2.34322	1.22849
GREB1	274.775	92.9921	42.0994	49.4037	4.01918	2.0069
PRDX2	274.775	122.642	64.1759	64.0705	3.09886	1.63174
RPL34	274.775	133.423	65.7161	71.7898	2.96859	1.56978
GLG1	274.775	146.901	59.0418	73.3337	3.18545	1.6715
EXT1	274.775	199.461	92.4133	110.386	2.33845	1.22555
ARF1	272.725	157.682	83.6854	100.351	2.3387	1.22571
AHCY	272.725	160.378	70.8502	86.4565	2.75323	1.46113
CDK4	272.725	185.984	67.2563	95.7197	2.81458	1.49292
GNB1	272.725	196.766	75.9843	101.123	2.65088	1.40647
HSPA4	272.725	196.766	73.4172	104.211	2.64311	1.40224
KRT81	272.725	373.316	194.068	184.492	1.70657	0.771103
PABPC4	270.674	140.162	62.1223	75.6495	2.98201	1.57628
SMC1A	270.674	145.553	66.2295	71.0179	3.03268	1.60059
ARCN1	270.674	163.073	69.8234	80.2811	2.88964	1.53089
PXN	270.674	204.852	78.5513	106.527	2.56933	1.36139
AKT1	270.674	223.72	78.0379	93.4039	2.88374	1.52794
RAD21	268.624	137.467	59.0418	76.4214	2.99779	1.5839
COX4I1	268.624	157.682	62.1223	75.6495	3.09429	1.62961
CAND1	268.624	165.769	70.3368	91.8601	2.67818	1.42125
CNOT2	268.624	171.159	101.141	90.3162	2.29703	1.19977
CAPN1	268.624	172.507	55.448	73.3337	3.42542	1.77628
SF1	268.624	176.55	56.9882	82.5969	3.18927	1.67322
LAMC1	268.624	190.027	72.3904	88.7723	2.84589	1.50888
PHB2	268.624	196.766	82.1452	78.7372	2.89273	1.53243
HNRNPDL	268.624	196.766	97.5474	96.4917	2.39843	1.26209
XRCC6	268.624	200.809	94.4669	119.65	2.19242	1.13252
SON	268.624	206.2	89.3329	87.2285	2.68928	1.42722
ETF1	268.624	229.111	93.9535	118.878	2.33863	1.22567
PHGDH	266.573	126.685	36.4519	42.4563	4.98374	2.31723
ACTR2	266.573	136.119	55.9614	68.7021	3.23023	1.69164
MYO1B	266.573	141.51	80.6049	96.4917	2.30429	1.20433
RPS28	266.573	148.248	54.9346	72.5617	3.25359	1.70203
YBX3	266.573	149.596	60.0686	71.0179	3.17477	1.66665
PTMS	266.573	168.464	66.2295	75.6495	3.06625	1.61648
CD24	266.573	183.289	60.0686	74.8775	3.33364	1.7371
TUBB4B	266.573	268.195	117.57	136.632	2.10371	1.07293
RAD23B	264.522	173.855	72.9038	101.895	2.50789	1.32648
CCT4	264.522	183.289	78.0379	96.4917	2.56582	1.35942
CCT5	264.522	190.027	97.5474	103.439	2.26159	1.17734
DCAF7	262.472	125.337	53.9078	67.1582	3.20329	1.67955
CKAP5	262.472	129.38	59.0418	69.474	3.04906	1.60836
LDOC1	260.421	87.6013	39.5324	45.5441	4.09071	2.03235
TRPM7	260.421	119.946	32.3447	55.5792	4.3261	2.11307
PSMD7	260.421	126.685	69.8234	74.8775	2.67522	1.41966
EPRS1	260.421	136.119	62.6357	64.0705	3.1296	1.64598
PPP1CA	260.421	136.119	51.8541	84.1407	2.91585	1.54391
TMPO	260.421	168.464	72.9038	69.474	3.0123	1.59087
HYOU1	258.371	149.596	49.8005	70.2459	3.39841	1.76486
TOP1	258.371	150.944	73.4172	92.632	2.46502	1.3016
UBAP2L	258.371	203.504	89.3329	117.334	2.23488	1.1602
BPTF	256.32	118.599	34.9117	50.9476	4.36667	2.12653
TUBB	256.32	142.857	100.114	90.3162	2.09618	1.06777
SURF4	256.32	144.205	60.5821	66.3863	3.15453	1.65742
OAS3	254.27	103.774	39.019	44.7721	4.27305	2.09527
SCIN	254.27	110.512	33.3715	54.0353	4.17338	2.06122
RPL36	254.27	133.423	56.9882	71.0179	3.02871	1.5987
HK1	254.27	134.771	57.5016	77.1933	2.88831	1.53023
BCAP31	254.27	152.291	74.9575	94.9478	2.39287	1.25874
UBA52	254.27	171.159	69.8234	106.527	2.41241	1.27048
THOC7	252.219	111.86	43.6396	62.5266	3.42933	1.77793
ARHGAP35	252.219	152.291	59.5552	60.9827	3.35588	1.74669
MYL12A	252.219	153.639	65.2027	95.7197	2.52207	1.33461
NSD2	252.219	171.159	60.0686	74.8775	3.13739	1.64956
TUFM	252.219	172.507	74.9575	96.4917	2.47727	1.30875
CS	252.219	200.809	87.2792	108.843	2.30993	1.20785
CBX5	250.169	90.2967	56.9882	54.0353	3.0666	1.61664
BCAM	250.169	102.426	32.8581	46.316	4.45341	2.15491
ESYT1	250.169	132.076	56.9882	76.4214	2.86519	1.51863
YME1L1	250.169	136.119	71.3636	78.7372	2.57352	1.36374
CACNG4	250.169	148.248	61.6089	69.474	3.03943	1.6038
TPD52L1	248.118	110.512	42.6128	62.5266	3.411	1.77019
DDOST	246.067	105.122	49.2871	55.5792	3.34892	1.7437
IGFBP5	246.067	105.122	50.3139	65.6143	3.02936	1.59902
PRKAR1A	246.067	128.033	48.7737	69.474	3.1637	1.66161
AP1B1	246.067	134.771	55.9614	60.2108	3.27822	1.71291
RPN1	246.067	152.291	49.8005	71.7898	3.27624	1.71204
IGFBP2	244.017	92.9921	42.6128	41.6844	3.99787	1.99923
INTS1	244.017	125.337	52.8809	89.5443	2.59332	1.3748
S100A16	244.017	138.814	67.7698	83.3688	2.53298	1.34084
ZMYND8	244.017	140.162	46.2067	65.6143	3.43566	1.78059
JUP	244.017	146.901	60.5821	77.9653	2.82154	1.49648
NFE2L1	244.017	148.248	53.3944	82.5969	2.88449	1.52832
ACTN1	244.017	171.159	101.655	111.93	1.94385	0.958914
DEK	241.966	82.2104	60.0686	55.5792	2.80314	1.48704
ABCC5	241.966	123.989	46.2067	49.4037	3.82757	1.93643
LAPTM4A	241.966	126.685	48.7737	67.9301	3.15886	1.6594
FAT1	241.966	129.38	72.3904	74.8775	2.52157	1.33432
U2AF2	241.966	136.119	67.7698	94.1759	2.33464	1.2232
USP7	241.966	148.248	55.9614	80.2811	2.86412	1.51809
CUL3	241.966	233.154	95.4937	77.1933	2.75134	1.46013
CRTAP	239.916	99.7307	51.8541	47.0879	3.43278	1.77938
ADGRG6	239.916	129.38	63.1491	64.8424	2.88532	1.52873
YY1	239.916	134.771	68.7966	74.8775	2.60789	1.38289
SLC39A8	237.865	115.903	46.2067	57.1231	3.42368	1.77555
AMFR	237.865	115.903	44.6664	60.2108	3.37317	1.7541
MTA2	237.865	119.946	47.2335	68.7021	3.0863	1.62588
CHD3	237.865	122.642	45.6932	71.0179	3.08888	1.62708
LRP10	237.865	130.728	55.9614	76.4214	2.7843	1.47731
MED13L	237.865	132.076	49.8005	57.1231	3.45986	1.79071
AMD1	237.865	177.898	69.8234	84.9127	2.68692	1.42595
SLC44A1	235.815	79.515	37.4787	48.6318	3.66192	1.8726
CLIC4	235.815	107.817	35.9385	47.0879	4.13882	2.04922
TPR	235.815	115.903	47.7469	57.895	3.32934	1.73524
ESRP2	235.815	129.38	51.8541	77.1933	2.82993	1.50076
MTCH1	235.815	154.987	61.0955	72.5617	2.92391	1.5479
XPO1	235.815	168.464	74.4441	91.0881	2.4423	1.28824
FAM102A	233.764	95.6875	39.019	51.7195	3.63078	1.86028
EPCAM	233.764	97.0352	47.7469	51.7195	3.32574	1.73367
ARMT1	233.764	101.078	45.6932	52.4915	3.41033	1.76991
KHSRP	233.764	122.642	50.3139	67.9301	3.01415	1.59175
RNF213	233.764	134.771	63.1491	54.0353	3.14492	1.65302
XRN2	233.764	145.553	52.3675	66.3863	3.19415	1.67543
EPAS1	233.764	202.157	73.9306	77.9653	2.86987	1.52098
SRSF5	231.713	86.2535	53.3944	47.8599	3.14028	1.6509
RHOBTB3	231.713	118.599	57.5016	64.0705	2.88152	1.52683
DKC1	231.713	122.642	54.4212	67.9301	2.89621	1.53417
GNB2	231.713	132.076	60.5821	87.2285	2.46119	1.29935
PRMT1	231.713	144.205	82.1452	82.5969	2.28186	1.19021
CTNNB1	231.713	190.027	62.6357	77.1933	3.01612	1.59269
CLCN7	229.663	68.7333	38.5055	42.4563	3.68564	1.88191
FGD5-AS1	229.663	101.078	45.1798	61.7547	3.09293	1.62898
PAIP1	229.663	119.946	46.7201	50.1757	3.6081	1.85124
USP10	229.663	128.033	60.0686	67.9301	2.79452	1.4826
CTDSP2	229.663	134.771	49.2871	70.2459	3.04881	1.60825
NELFCD	229.663	137.467	42.0994	69.474	3.29048	1.7183
USP5	229.663	145.553	64.1759	77.1933	2.65415	1.40825
MDH2	229.663	150.944	76.4977	72.5617	2.55339	1.35241
PKD1	227.612	103.774	36.9653	44.0002	4.09293	2.03313
LLGL2	227.612	119.946	51.8541	74.8775	2.74248	1.45548
COPB2	227.612	125.337	55.9614	81.8249	2.56157	1.35703
CLIC1	227.612	128.033	59.0418	64.8424	2.87078	1.52145
TRIP12	227.612	133.423	89.8463	66.3863	2.31089	1.20845
YWHAG	227.612	146.901	80.0915	73.3337	2.44101	1.28748
ARHGDIA	227.612	185.984	83.172	110.386	2.1368	1.09545
LASP1	227.612	208.895	84.1988	80.2811	2.65387	1.4081
HEATR6	225.562	105.122	42.6128	67.1582	3.01248	1.59095
HSBP1	225.562	111.86	62.6357	57.895	2.79947	1.48515
WDR6	225.562	130.728	48.2603	78.7372	2.80549	1.48825
CPNE3	225.562	134.771	46.7201	57.1231	3.46997	1.79492
SPTAN1	225.562	138.814	69.31	77.9653	2.47412	1.30691
ACTR3	225.562	141.51	62.1223	80.2811	2.57769	1.36608
ATP2B1	225.562	145.553	55.9614	78.7372	2.75515	1.46213
MACROH2A1	225.562	148.248	60.0686	65.6143	2.97423	1.57252
TFRC	225.562	184.636	89.3329	104.983	2.11099	1.07792
SYNE2	223.511	60.647	36.4519	20.8422	4.95964	2.31024
ST13	223.511	95.6875	41.586	43.2283	3.7635	1.91208
CDC25B	223.511	97.0352	41.586	60.2108	3.14889	1.65484
DDX6	223.511	105.122	42.0994	53.2634	3.44613	1.78498
KDM5C	223.511	117.251	38.5055	50.9476	3.80939	1.92956
DDX42	223.511	119.946	55.9614	64.8424	2.8431	1.50747
C1orf43	223.511	126.685	47.2335	60.9827	3.23608	1.69425
SQLE	223.511	145.553	79.0647	98.0355	2.08393	1.05931
MAP4	223.511	146.901	39.5324	65.6143	3.52281	1.81673
CCT6A	223.511	168.464	77.0111	108.843	2.10905	1.07659
PRSS23	223.511	169.812	65.2027	123.509	2.08425	1.05953
MARCHF6	221.461	88.949	44.6664	54.0353	3.14492	1.65303
RBM8A	221.461	117.251	56.4748	57.1231	2.98167	1.57612
ATN1	221.461	117.251	61.6089	66.3863	2.64628	1.40397
DDX54	221.461	132.076	52.3675	65.6143	2.99653	1.58329
WDR1	221.461	132.076	58.5284	74.8775	2.65008	1.40604
HNRNPA0	221.461	138.814	60.0686	77.1933	2.62472	1.39217
TMED2	221.461	140.162	56.9882	71.0179	2.82504	1.49827
MTHFD1	221.461	141.51	65.7161	84.9127	2.4097	1.26885
ACLY	221.461	177.898	77.0111	76.4214	2.60283	1.38008
VDAC1	221.461	183.289	60.5821	77.9653	2.92138	1.54665
YWHAE	221.461	187.332	69.31	82.5969	2.69107	1.42818
OBSL1	219.41	91.6444	40.5592	50.1757	3.42817	1.77744
OS9	219.41	121.294	50.8273	57.895	3.13371	1.64787
APRT	219.41	153.639	56.9882	77.1933	2.78018	1.47518
TNFRSF12A	219.41	192.723	64.1759	103.439	2.45881	1.29796
WARS1	217.36	87.6013	46.7201	50.9476	3.12243	1.64267
TCEA1	217.36	99.7307	37.4787	46.316	3.78413	1.91996
LAMP2	217.36	99.7307	36.9653	61.7547	3.21202	1.68348
NOP53	217.36	113.208	34.9117	43.2283	4.23045	2.08081
DNM2	217.36	113.208	58.5284	54.0353	2.93671	1.5542
MTPN	217.36	125.337	51.8541	57.895	3.12255	1.64272
BAG6	217.36	129.38	53.9078	69.474	2.8103	1.49072
SCRN1	217.36	132.076	41.0726	42.4563	4.1834	2.06468
FBL	217.36	157.682	74.9575	72.5617	2.54233	1.34615
PHB	217.36	171.159	91.8999	98.8075	2.03725	1.02662
SPTBN1	217.36	203.504	78.5513	80.2811	2.64974	1.40585
CTSA	215.309	88.949	37.9921	40.9125	3.85602	1.94711
CSNK1D	215.309	105.122	60.0686	68.7021	2.48838	1.31521
HSPB8	215.309	106.469	38.5055	53.2634	3.5064	1.80999
NCAPD2	215.309	113.208	54.4212	64.0705	2.77249	1.47118
FAM168B	215.309	115.903	47.7469	54.0353	3.25413	1.70227
RSL24D1	215.309	121.294	37.4787	40.1405	4.33659	2.11656
BUB3	215.309	122.642	55.448	69.474	2.70529	1.43579
OAZ1	215.309	126.685	63.6625	84.9127	2.30182	1.20278
STAG2	215.309	129.38	56.4748	61.7547	2.91543	1.54371
ASS1	213.258	92.9921	33.8849	52.4915	3.54554	1.826
USP8	213.258	102.426	35.9385	37.8247	4.2797	2.09751
GARS1	213.258	122.642	47.2335	67.1582	2.9364	1.55405
CYB561	213.258	129.38	49.2871	78.7372	2.67636	1.42027
MLF2	213.258	130.728	54.4212	78.7372	2.58329	1.36921
AP1G1	213.258	142.857	51.8541	54.0353	3.36309	1.74979
ZMYND11	211.208	87.6013	31.3178	52.4915	3.56534	1.83404
SYT12	211.208	103.774	48.7737	84.9127	2.35612	1.23642
HADHA	211.208	110.512	49.8005	77.9653	2.51805	1.33231
REEP5	211.208	113.208	45.6932	49.4037	3.41142	1.77037
ZDHHC7	211.208	118.599	41.0726	57.1231	3.35867	1.74789
BAZ1B	211.208	119.946	43.1262	59.4389	3.22872	1.69096
EIF2AK1	211.208	126.685	48.2603	48.6318	3.48731	1.80211
KMT2D	211.208	129.38	43.6396	61.7547	3.23156	1.69223
IMPDH2	211.208	130.728	46.2067	58.6669	3.26046	1.70507
JAK1	211.208	133.423	63.1491	64.0705	2.70895	1.43773
ZFR	211.208	150.944	77.5245	78.7372	2.3176	1.21263
USP9X	209.157	88.949	55.9614	57.895	2.61827	1.38861
AP3D1	209.157	101.078	43.1262	67.9301	2.7935	1.48207
APEX1	209.157	134.771	47.2335	60.9827	3.17816	1.66819
PIK3R1	207.107	79.515	30.8044	44.7721	3.79247	1.92314
LARS1	207.107	87.6013	45.1798	37.8247	3.5505	1.82802
MYO5C	207.107	101.078	44.6664	50.9476	3.22322	1.6885
ARF3	207.107	101.078	40.0458	59.4389	3.09782	1.63125
ARL6IP1	207.107	115.903	44.153	52.4915	3.34225	1.74082
PSMB4	207.107	126.685	61.0955	64.0705	2.66679	1.41511
NET1	207.107	130.728	23.6167	27.7896	6.57185	2.7163
ANKRD52	207.107	132.076	71.877	74.8775	2.31122	1.20866
NIBAN2	207.107	137.467	74.4441	71.7898	2.35632	1.23653
SSRP1	207.107	163.073	69.31	67.1582	2.71257	1.43966
KCMF1	207.107	184.636	82.1452	108.071	2.05947	1.04227
TXNIP	205.056	48.5176	14.3754	20.8422	7.2002	2.84804
UBR4	205.056	83.5581	41.586	57.895	2.9012	1.53665
PDS5A	205.056	86.2535	39.5324	60.2108	2.9206	1.54626
SAP18	205.056	99.7307	43.1262	52.4915	3.18756	1.67245
UBA2	205.056	102.426	59.0418	56.3511	2.66465	1.41395
NRDC	205.056	109.165	45.6932	47.8599	3.35874	1.74792
STT3B	205.056	118.599	45.6932	52.4915	3.29639	1.72089
SNRNP70	205.056	126.685	74.9575	87.2285	2.04544	1.03241
WASHC5	205.056	132.076	39.5324	47.0879	3.89207	1.96054
RBBP7	205.056	134.771	78.0379	79.5091	2.15699	1.10902
ATIC	205.056	138.814	49.8005	60.9827	3.10399	1.63413
WNK1	205.056	148.248	59.5552	65.6143	2.82261	1.49703
PSMC3	205.056	152.291	57.5016	79.5091	2.60817	1.38304
UGDH	205.056	165.769	69.8234	93.4039	2.27183	1.18385
KMT2A	203.006	66.0379	31.3178	32.4212	4.22102	2.07759
YARS1	203.006	114.555	40.5592	54.0353	3.35708	1.74721
SETD7	203.006	125.337	45.6932	65.6143	2.94987	1.56065
PA2G4	203.006	128.033	65.2027	66.3863	2.5157	1.33096
GHITM	203.006	169.812	62.6357	91.8601	2.41312	1.2709
WDR26	200.955	72.7764	52.3675	49.4037	2.68967	1.42743
TSC22D3	200.955	76.8196	23.6167	37.0528	4.57849	2.19487
DHX38	200.955	94.3398	34.9117	56.3511	3.23565	1.69406
RNF10	200.955	95.6875	49.2871	64.0705	2.61687	1.38784
SLC25A39	200.955	113.208	48.2603	83.3688	2.38673	1.25503
CCDC47	200.955	115.903	47.7469	56.3511	3.04385	1.6059
SH3BGRL	200.955	115.903	52.3675	64.8424	2.70334	1.43474
GRINA	200.955	138.814	38.5055	43.2283	4.15702	2.05555
PDIA6	200.955	152.291	61.6089	77.9653	2.53089	1.33964
NCKAP1	198.904	103.774	49.2871	54.8073	2.90773	1.53989
WAC	198.904	117.251	72.9038	91.0881	1.92787	0.947009
DAZAP1	198.904	119.946	40.0458	73.3337	2.81225	1.49172
ATP6AP1	198.904	128.033	49.8005	57.895	3.03575	1.60205
TRAP1	198.904	134.771	71.877	75.6495	2.2618	1.17747
SRSF7	198.904	153.639	72.9038	75.6495	2.37318	1.24682
PAWR	196.854	82.2104	32.8581	36.2809	4.03628	2.01303
POLR2A	196.854	82.2104	33.8849	44.0002	3.58303	1.84118
AHCYL1	196.854	83.5581	39.019	44.7721	3.34656	1.74268
LUC7L3	196.854	91.6444	45.6932	57.895	2.78505	1.4777
MAPK6	196.854	95.6875	52.3675	81.8249	2.18001	1.12434
TSC2	196.854	97.0352	42.0994	46.316	3.32396	1.7329
KHDRBS1	196.854	119.946	55.9614	84.9127	2.24882	1.16917
NME4	196.854	125.337	44.153	65.6143	2.93522	1.55347
LMNB2	196.854	125.337	63.1491	68.7021	2.4436	1.28901
TMEM164	196.854	132.076	52.3675	56.3511	3.02551	1.59718
UBE2K	196.854	141.51	95.4937	101.123	1.72093	0.783186
TCP1	196.854	148.248	52.3675	68.7021	2.85044	1.51119
CSRP1	196.854	154.987	68.7966	78.7372	2.38481	1.25388
PTK2	194.803	86.2535	36.4519	40.9125	3.6329	1.86112
VPS35	194.803	87.6013	38.5055	39.3686	3.62642	1.85855
BAZ2A	194.803	95.6875	45.1798	50.9476	3.02194	1.59547
MARCKSL1	194.803	101.078	49.2871	54.0353	2.86367	1.51787
RAB10	194.803	153.639	69.31	75.6495	2.40372	1.26527
PUM1	194.803	203.504	115.003	86.4565	1.97711	0.983392
MYO6	192.753	71.4287	31.3178	47.8599	3.33656	1.73836
MAVS	192.753	79.515	44.153	47.0879	2.98405	1.57727
AKT2	192.753	88.949	44.6664	52.4915	2.89942	1.53577
DCTN1	192.753	90.2967	35.9385	43.2283	3.57536	1.83809
FKBP8	192.753	92.9921	41.0726	35.5089	3.73125	1.89966
TGOLN2	192.753	95.6875	41.0726	51.7195	3.10846	1.6362
PPM1D	192.753	95.6875	38.5055	58.6669	2.96833	1.56965
PAK2	192.753	102.426	43.1262	53.2634	3.06235	1.61464
ITPR3	192.753	109.165	39.019	55.5792	3.19158	1.67427
GSR	192.753	118.599	61.0955	61.7547	2.5344	1.34164
TPM1	192.753	126.685	51.8541	64.0705	2.75556	1.46235
DYNC1LI2	192.753	128.033	44.153	49.4037	3.42878	1.77769
SZRD1	192.753	128.033	65.7161	75.6495	2.26919	1.18218
UBTF	192.753	130.728	46.2067	55.5792	3.17805	1.66814
BANF1	192.753	130.728	47.2335	64.0705	2.90628	1.53918
MCM4	192.753	132.076	68.7966	94.9478	1.98375	0.988233
PDIA4	190.702	90.2967	55.9614	57.895	2.46801	1.30335
SCARB2	190.702	98.3829	44.153	54.8073	2.92122	1.54657
RPL7L1	190.702	103.774	36.9653	61.7547	2.98294	1.57674
PICALM	190.702	107.817	41.0726	54.8073	3.11347	1.63852
SLC4A2	190.702	119.946	69.8234	74.8775	2.14683	1.10221
MYH14	190.702	126.685	43.1262	49.4037	3.4301	1.77825
PSMD4	190.702	126.685	53.3944	72.5617	2.51982	1.33332
CIZ1	190.702	132.076	36.4519	49.4037	3.75954	1.91056
SUPT5H	190.702	138.814	49.2871	64.8424	2.88722	1.52968
FLII	190.702	156.335	62.1223	72.5617	2.57667	1.36551
PYGB	190.702	191.375	75.9843	71.0179	2.59913	1.37803
VAPB	188.652	66.0379	37.4787	43.2283	3.15573	1.65797
SCAF11	188.652	72.7764	31.8312	44.0002	3.44749	1.78555
SMARCA5	188.652	84.9058	33.8849	40.9125	3.65732	1.87079
EP400	188.652	84.9058	42.6128	49.4037	2.97292	1.57188
AGO2	188.652	90.2967	35.4251	40.1405	3.69147	1.8842
DNMT1	188.652	91.6444	50.8273	67.1582	2.37568	1.24834
ATP5PB	188.652	92.9921	43.6396	52.4915	2.92979	1.5508
BCLAF1	188.652	123.989	63.6625	71.0179	2.32136	1.21497
MTSS2	188.652	128.033	56.4748	57.1231	2.78777	1.47911
CHCHD2	188.652	140.162	48.2603	70.2459	2.77465	1.47231
THAP12	186.601	59.2993	37.4787	44.7721	2.98964	1.57997
NDST1	186.601	66.0379	38.5055	37.0528	3.34363	1.74141
TAF7	186.601	76.8196	35.9385	38.5967	3.53418	1.82138
CUX1	186.601	78.1673	26.1838	27.7896	4.90554	2.29441
ATXN7L3B	186.601	82.2104	39.019	58.6669	2.75179	1.46037
PRPF6	186.601	99.7307	39.5324	40.9125	3.55936	1.83162
TRIM25	186.601	102.426	49.2871	50.1757	2.90588	1.53898
QSOX1	186.601	103.774	38.5055	48.6318	3.33238	1.73655
EMP2	186.601	109.165	35.9385	51.7195	3.37409	1.7545
TM9SF3	186.601	110.512	59.0418	61.7547	2.45962	1.29844
CAPZB	186.601	113.208	70.8502	66.3863	2.18462	1.12738
UBE2D2	186.601	114.555	47.7469	88.0004	2.21851	1.14959
TAF15	186.601	134.771	61.0955	94.1759	2.06975	1.04945
CBX3	186.601	137.467	59.0418	91.8601	2.14754	1.10268
TAGLN2	186.601	179.246	81.6318	100.351	2.01033	1.00744
CLSTN1	184.551	76.8196	34.3983	48.6318	3.1479	1.65439
MYO5A	184.551	83.5581	33.8849	44.0002	3.44236	1.7834
KDM2A	184.551	91.6444	41.0726	54.8073	2.88064	1.52639
TBX2	184.551	103.774	41.586	43.2283	3.39948	1.76531
CDKN1A	184.551	106.469	46.7201	60.2108	2.72157	1.44444
SLC9A3R2	184.551	113.208	47.2335	68.7021	2.56831	1.36082
ACADVL	184.551	114.555	50.3139	71.7898	2.44961	1.29255
NDUFB9	184.551	117.251	36.9653	71.7898	2.77506	1.47252
CDYL2	184.551	119.946	42.6128	58.6669	3.00649	1.58808
EIF1AX	184.551	132.076	46.7201	69.474	2.72498	1.44624
PPIB	184.551	187.332	82.1452	106.527	1.97105	0.978967
INPP4B	182.5	70.081	30.8044	38.5967	3.63944	1.86372
MDN1	182.5	74.1241	32.8581	31.6493	3.97822	1.99212
RAB5B	182.5	82.2104	21.0497	35.5089	4.68028	2.2266
NSD1	182.5	87.6013	31.3178	27.7896	4.56967	2.19209
HMGB2	182.5	87.6013	37.4787	40.1405	3.47982	1.79901
RXRA	182.5	97.0352	37.4787	43.2283	3.46358	1.79226
PRPF19	182.5	101.078	46.2067	79.5091	2.25571	1.17358
ANXA5	182.5	102.426	42.6128	53.2634	2.97181	1.57134
SUMO3	182.5	105.122	35.4251	47.0879	3.48577	1.80148
ITGAV	182.5	105.122	49.2871	47.8599	2.96068	1.56593
FAM234A	182.5	114.555	45.1798	58.6669	2.86052	1.51628
SUPT16H	182.5	119.946	48.7737	56.3511	2.87702	1.52458
RAB1A	182.5	136.119	81.6318	85.6846	1.90429	0.929253
PDIA3	182.5	137.467	53.3944	55.5792	2.93619	1.55394
HMGCS1	182.5	157.682	84.1988	67.9301	2.23614	1.16101
CAPNS1	182.5	161.725	62.1223	70.2459	2.60051	1.3788
SRF	182.5	177.898	60.0686	64.0705	2.90318	1.53763
PLCG1	180.449	78.1673	30.8044	44.7721	3.42192	1.7748
TANC2	180.449	79.515	42.0994	33.9651	3.41769	1.77302
HP1BP3	180.449	80.8627	47.7469	54.0353	2.56737	1.36029
METTL9	180.449	91.6444	32.3447	50.9476	3.26674	1.70785
GOLM1	180.449	98.3829	42.0994	44.0002	3.23849	1.69532
TNFRSF1A	180.449	105.122	50.3139	66.3863	2.44705	1.29104
NACC1	180.449	113.208	35.9385	75.6495	2.63162	1.39595
MAPKAPK2	180.449	114.555	46.7201	75.6495	2.41077	1.26949
KIF5B	180.449	134.771	53.9078	72.5617	2.49246	1.31757
ASPH	180.449	179.246	90.3597	95.7197	1.93302	0.950856
JUNB	178.399	68.7333	25.157	41.6844	3.69729	1.88647
UBP1	178.399	87.6013	37.9921	49.4037	3.04362	1.60579
EXOC7	178.399	90.2967	29.7776	57.1231	3.09198	1.62853
STT3A	178.399	91.6444	43.6396	43.2283	3.10867	1.6363
NAA50	178.399	91.6444	57.5016	60.9827	2.27915	1.18849
NR2F2	178.399	92.9921	36.9653	33.9651	3.82616	1.9359
KDELR1	178.399	94.3398	42.6128	51.7195	2.89125	1.53169
IST1	178.399	97.0352	41.0726	45.5441	3.17992	1.66899
SNRPB	178.399	101.078	56.4748	61.7547	2.36385	1.24114
ERP29	178.399	102.426	38.5055	51.7195	3.11249	1.63807
TPX2	178.399	110.512	47.2335	63.2985	2.61382	1.38616
CACNA1H	178.399	111.86	48.2603	68.7021	2.48164	1.3113
DDX23	178.399	114.555	39.019	64.8424	2.82063	1.49602
CSE1L	178.399	121.294	55.9614	60.9827	2.5627	1.35767
HCFC1	178.399	123.989	53.3944	58.6669	2.69842	1.43211
PRPF38B	176.348	61.9947	27.724	35.5089	3.76929	1.91429
SP1	176.348	63.3424	36.9653	41.6844	3.04757	1.60766
RBL2	176.348	70.081	24.1301	26.2457	4.89181	2.29037
PKP4	176.348	74.1241	37.4787	38.5967	3.29242	1.71915
THOC2	176.348	78.1673	33.8849	39.3686	3.47445	1.79678
SMG7	176.348	78.1673	39.5324	52.4915	2.76576	1.46767
HACD3	176.348	79.515	46.2067	37.8247	3.04485	1.60637
UBN1	176.348	92.9921	37.4787	48.6318	3.12785	1.64517
SF3B4	176.348	92.9921	43.1262	58.6669	2.64596	1.40379
CDC37	176.348	92.9921	42.0994	60.2108	2.63259	1.39648
ERH	176.348	94.3398	49.8005	60.2108	2.46055	1.29898
MCM3	176.348	106.469	58.015	71.0179	2.19183	1.13213
C6orf62	176.348	106.469	55.448	89.5443	1.95057	0.963896
MYBL2	176.348	111.86	58.015	81.053	2.07243	1.05132
USP22	176.348	114.555	42.6128	39.3686	3.54841	1.82717
ANAPC5	176.348	115.903	51.8541	63.2985	2.53795	1.34366
EIF5B	176.348	118.599	50.3139	44.7721	3.10189	1.63315
PDAP1	176.348	138.814	41.586	60.9827	3.0727	1.61951
LRRC59	176.348	141.51	88.8195	88.0004	1.79764	0.846102
TRA2B	176.348	150.944	82.1452	82.5969	1.98669	0.99037
LGALS3	174.298	72.7764	40.5592	48.6318	2.77017	1.46997
CAPN15	174.298	80.8627	41.0726	53.2634	2.70481	1.43552
SRSF6	174.298	80.8627	63.6625	50.9476	2.22633	1.15467
VPS51	174.298	86.2535	21.5631	50.9476	3.59328	1.8453
ECPAS	174.298	87.6013	41.586	48.6318	2.90296	1.53753
TBC1D9B	174.298	92.9921	42.6128	50.1757	2.88064	1.52639
TRMT112	174.298	94.3398	41.586	67.9301	2.45295	1.29452
FTSJ3	174.298	101.078	40.5592	57.895	2.797	1.48388
SERP1	174.298	102.426	39.5324	41.6844	3.40723	1.7686
SPAG9	174.298	102.426	52.3675	60.2108	2.45806	1.29752
CBX6	174.298	103.774	37.9921	52.4915	3.07317	1.61973
STUB1	174.298	114.555	40.5592	64.0705	2.76072	1.46504
NOLC1	174.298	123.989	84.1988	89.5443	1.71683	0.779747
PALLD	172.247	71.4287	27.2106	34.737	3.93358	1.97584
IGSF3	172.247	80.8627	46.7201	51.7195	2.57122	1.36245
VEZF1	172.247	83.5581	48.2603	60.9827	2.34162	1.22751
COPA	172.247	90.2967	47.2335	41.6844	2.95266	1.56201
PPP6R3	172.247	90.2967	43.6396	47.0879	2.89376	1.53295
NBN	172.247	91.6444	35.9385	47.8599	3.14913	1.65495
TRIR	172.247	91.6444	39.019	54.8073	2.81256	1.49188
SEC31A	172.247	92.9921	37.4787	40.9125	3.38353	1.75853
HMGB3	172.247	92.9921	45.1798	46.316	2.89892	1.53552
OGDH	172.247	92.9921	47.7469	44.0002	2.89098	1.53156
RAB6A	172.247	95.6875	33.8849	47.8599	3.2777	1.71268
CTCF	172.247	95.6875	38.5055	48.6318	3.07486	1.62052
ASAP1	172.247	99.7307	34.3983	44.7721	3.43535	1.78046
TRIO	172.247	105.122	33.8849	42.4563	3.63328	1.86127
CYC1	172.247	105.122	43.6396	47.0879	3.05716	1.61219
RPS26	172.247	122.642	50.8273	73.3337	2.37505	1.24796
PSME3	172.247	123.989	35.4251	47.8599	3.5569	1.83062
COL12A1	170.197	64.6902	20.0229	25.4738	5.16272	2.36813
PARD6B	170.197	70.081	24.1301	39.3686	3.78397	1.9199
SLC44A2	170.197	76.8196	26.6972	43.2283	3.53256	1.82072
ERGIC3	170.197	86.2535	37.4787	53.2634	2.82614	1.49883
GOLGB1	170.197	87.6013	17.9693	43.2283	4.21255	2.0747
NDUFV1	170.197	92.9921	33.3715	46.316	3.30276	1.72367
PI4KA	170.197	95.6875	28.2374	44.7721	3.64177	1.86464
GRB2	170.197	95.6875	43.6396	56.3511	2.65909	1.41093
EIF4EBP2	170.197	102.426	35.9385	51.7195	3.11007	1.63695
SHROOM3	170.197	111.86	32.3447	57.1231	3.15261	1.65655
PFN2	170.197	115.903	60.0686	71.0179	2.18253	1.126
STARD7	170.197	123.989	58.5284	57.895	2.52686	1.33735
PSMC1	170.197	128.033	48.7737	54.0353	2.90081	1.53645
DIAPH1	170.197	128.033	52.8809	67.1582	2.48443	1.31292
CELSR2	170.197	136.119	50.3139	72.5617	2.49289	1.31782
RAD23A	168.146	55.2562	31.3178	41.6844	3.06021	1.61363
CIRBP	168.146	71.4287	32.3447	20.0703	4.57074	2.19243
MACF1	168.146	74.1241	27.2106	41.6844	3.51651	1.81415
SEPTIN7	168.146	74.1241	35.9385	43.2283	3.06025	1.61365
ARFGEF3	168.146	78.1673	22.5899	34.737	4.29664	2.10321
PURB	168.146	78.1673	24.6435	43.2283	3.6291	1.85961
TMOD3	168.146	78.1673	50.8273	50.1757	2.43867	1.2861
DHCR7	168.146	79.515	42.0994	50.1757	2.68394	1.42435
UBFD1	168.146	84.9058	37.9921	51.7195	2.82072	1.49607
RHOT2	168.146	84.9058	39.5324	57.1231	2.61808	1.38851
SEPTIN11	168.146	86.2535	41.0726	37.8247	3.22444	1.68905
LAMP1	168.146	87.6013	42.6128	43.2283	2.97931	1.57498
ARID1A	168.146	88.949	34.3983	50.1757	3.03988	1.60402
GLUD1	168.146	88.949	46.2067	47.0879	2.75573	1.46244
MCCC2	168.146	92.9921	31.3178	32.4212	4.09699	2.03456
G3BP1	168.146	92.9921	33.3715	49.4037	3.15479	1.65754
OSBPL9	168.146	94.3398	34.3983	28.5615	4.1691	2.05974
EPN1	168.146	94.3398	38.5055	57.895	2.72287	1.44513
PFKL	168.146	101.078	34.9117	38.5967	3.6625	1.87283
DDIT4	168.146	101.078	43.1262	38.5967	3.29436	1.72
UBE2I	168.146	101.078	40.0458	62.5266	2.62473	1.39217
H2AX	168.146	102.426	43.6396	78.7372	2.21098	1.14468
TRRAP	168.146	103.774	39.5324	65.6143	2.5861	1.37078
PIAS3	168.146	109.165	32.8581	56.3511	3.10854	1.63624
TLN1	168.146	115.903	49.8005	54.8073	2.71537	1.44115
RC3H2	168.146	121.294	141.7	165.966	0.940761	-0.0881005
RBM3	168.146	125.337	52.3675	62.5266	2.55438	1.35297
HAT1	168.146	215.634	159.67	198.387	1.07184	0.100092
TPBG	166.095	52.5608	22.0765	35.5089	3.79707	1.92489
DRAM1	166.095	64.6902	23.6167	22.3861	5.01677	2.32676
RBBP4	166.095	68.7333	41.0726	36.2809	3.03579	1.60207
S100A14	166.095	70.081	31.3178	37.8247	3.41579	1.77222
SMC4	166.095	91.6444	44.153	42.4563	2.97589	1.57332
EIF3D	166.095	95.6875	45.1798	46.316	2.86115	1.51659
SLC6A6	166.095	95.6875	40.0458	66.3863	2.45963	1.29844
ADD1	166.095	97.0352	58.5284	72.5617	2.00725	1.00522
FAU	166.095	99.7307	53.9078	54.8073	2.44516	1.28993
PTGFRN	166.095	101.078	32.8581	41.6844	3.58418	1.84164
TMEM30A	166.095	102.426	36.4519	39.3686	3.54154	1.82438
IPO5	166.095	102.426	45.1798	66.3863	2.40684	1.26714
XPO6	166.095	103.774	45.6932	51.7195	2.77037	1.47008
SRSF11	166.095	106.469	68.2832	61.7547	2.09604	1.06767
ACIN1	166.095	109.165	57.5016	53.2634	2.48508	1.31329
MCM6	166.095	111.86	62.6357	67.9301	2.12885	1.09008
ATAD2	166.095	117.251	51.8541	67.9301	2.36547	1.24213
GOT2	166.095	126.685	52.3675	65.6143	2.48157	1.31125
TWF1	164.045	68.7333	33.3715	39.3686	3.20014	1.67813
TASOR2	164.045	72.7764	33.8849	41.6844	3.13383	1.64793
UCP2	164.045	74.1241	24.6435	39.3686	3.72069	1.89557
TADA3	164.045	79.515	29.7776	44.7721	3.26708	1.708
AFF4	164.045	88.949	26.1838	34.737	4.15283	2.0541
SEC24C	164.045	92.9921	41.586	40.9125	3.11566	1.63954
GALNT10	164.045	94.3398	48.7737	55.5792	2.47607	1.30805
GNA13	164.045	98.3829	34.3983	47.8599	3.1903	1.67369
NIPBL	164.045	98.3829	56.9882	76.4214	1.96708	0.976058
SH3GLB2	164.045	106.469	35.9385	38.5967	3.62935	1.85971
ARF6	164.045	106.469	40.5592	64.8424	2.56651	1.35981
SMG5	164.045	109.165	48.7737	47.0879	2.85004	1.51098
RANBP2	164.045	111.86	43.6396	48.6318	2.99015	1.58022
MCM2	164.045	111.86	50.8273	67.1582	2.33846	1.22556
H1-10	164.045	113.208	30.8044	50.9476	3.39139	1.76187
FUBP1	164.045	113.208	45.1798	73.3337	2.33942	1.22615
TNPO1	164.045	134.771	66.2295	74.1056	2.1293	1.09038
ILF2	164.045	163.073	65.2027	83.3688	2.20175	1.13865
NCAM2	161.994	64.6902	25.6704	23.9299	4.57023	2.19227
SEZ6L2	161.994	68.7333	30.291	29.3335	3.86968	1.95221
CDC42SE1	161.994	76.8196	30.8044	48.6318	3.00636	1.58802
PCNX3	161.994	80.8627	42.6128	54.0353	2.5128	1.32929
CPSF1	161.994	84.9058	40.5592	54.8073	2.58896	1.37237
NPLOC4	161.994	87.6013	36.4519	44.7721	3.07293	1.61961
INHBB	161.994	88.949	45.6932	52.4915	2.55583	1.35379
ADAM9	161.994	95.6875	52.3675	57.895	2.33698	1.22465
RBM25	161.994	101.078	46.7201	47.8599	2.78149	1.47586
TNS3	161.994	111.86	51.3407	50.1757	2.69764	1.4317
EIF3I	161.994	118.599	47.2335	66.3863	2.46958	1.30427
LAMA5	161.994	121.294	67.2563	78.7372	1.94042	0.956367
CCNL2	159.944	60.647	20.0229	37.0528	3.86488	1.95042
MADD	159.944	74.1241	28.2374	37.8247	3.54315	1.82503
CREBBP	159.944	74.1241	45.6932	40.1405	2.72699	1.44731
OGA	159.944	75.4719	35.9385	41.6844	3.03281	1.60066
SUMO2	159.944	75.4719	51.8541	45.5441	2.41704	1.27324
ANXA11	159.944	80.8627	37.9921	37.8247	3.17616	1.66728
CSNK2A1	159.944	92.9921	40.0458	43.2283	3.03739	1.60283
ARPC2	159.944	95.6875	47.7469	71.0179	2.15242	1.10596
GLUL	159.944	101.078	36.4519	44.0002	3.24444	1.69797
EIF3K	159.944	106.469	41.586	53.2634	2.8088	1.48995
EIF2S1	159.944	106.469	47.7469	53.2634	2.63748	1.39916
ETFA	159.944	107.817	47.7469	48.6318	2.77822	1.47416
CLUH	159.944	113.208	48.2603	51.7195	2.73207	1.44999
GTF3C1	159.944	123.989	40.5592	66.3863	2.65494	1.40868
CHTOP	159.944	129.38	49.2871	77.1933	2.2875	1.19377
AP2B1	159.944	141.51	59.5552	64.0705	2.43844	1.28596
MTCH2	159.944	214.286	149.402	223.089	1.00467	0.0067224
ZMIZ2	157.893	66.0379	21.5631	30.8773	4.2702	2.0943
ZMIZ1	157.893	67.3856	26.1838	36.2809	3.6065	1.8506
ECI1	157.893	80.8627	29.7776	33.1931	3.79154	1.92278
PTBP3	157.893	82.2104	32.3447	44.7721	3.11351	1.63854
PDCD6IP	157.893	84.9058	39.5324	42.4563	2.96137	1.56627
BRD2	157.893	88.949	31.3178	47.0879	3.14827	1.65456
KDELR2	157.893	90.2967	39.5324	47.0879	2.86526	1.51867
COPG1	157.893	97.0352	32.3447	48.6318	3.14818	1.65452
CYFIP1	157.893	97.0352	34.3983	47.8599	3.09913	1.63186
BAG3	157.893	97.0352	39.5324	59.4389	2.57578	1.36501
UBE2N	157.893	109.165	50.8273	58.6669	2.43901	1.2863
TOMM20	157.893	118.599	32.8581	61.7547	2.92235	1.54713
UBXN4	157.893	123.989	35.9385	53.2634	3.16005	1.65995
HNRNPL	157.893	149.596	50.3139	79.5091	2.36853	1.24399
SPDEF	155.843	64.6902	24.6435	49.4037	2.97827	1.57447
GRHL2	155.843	67.3856	18.4827	33.9651	4.2562	2.08957
MBNL1	155.843	70.081	77.5245	53.2634	1.72741	0.788607
NDUFB10	155.843	71.4287	33.3715	49.4037	2.74565	1.45715
COPZ1	155.843	74.1241	35.9385	55.5792	2.51281	1.3293
POLE	155.843	76.8196	36.9653	56.3511	2.49326	1.31803
FAM199X	155.843	78.1673	27.2106	32.4212	3.92425	1.97242
ARPC5	155.843	80.8627	39.019	39.3686	3.01968	1.5944
SMARCC2	155.843	82.2104	33.3715	40.9125	3.20464	1.68016
PSME1	155.843	83.5581	32.3447	37.0528	3.44971	1.78647
GMPS	155.843	83.5581	27.724	49.4037	3.10395	1.63411
ATP5F1C	155.843	84.9058	41.586	52.4915	2.55905	1.35561
ROCK1	155.843	87.6013	39.019	57.1231	2.53213	1.34035
DHX40	155.843	88.949	29.7776	30.8773	4.03581	2.01286
MAP4K4	155.843	91.6444	33.8849	28.5615	3.96319	1.98666
TLE5	155.843	92.9921	37.9921	44.7721	3.00655	1.58811
METAP2	155.843	102.426	46.7201	69.474	2.22274	1.15234
ZMYM2	155.843	110.512	37.9921	53.2634	2.91878	1.54537
RCC1	155.843	113.208	44.153	71.7898	2.32054	1.21446
TIAL1	155.843	146.901	57.5016	79.5091	2.20963	1.14381
SREBF2	153.792	61.9947	39.019	45.5441	2.55179	1.35151
DNAJC13	153.792	64.6902	21.5631	26.2457	4.56991	2.19217
MGRN1	153.792	66.0379	22.5899	33.9651	3.88701	1.95866
RAD51C	153.792	66.0379	23.6167	42.4563	3.32707	1.73425
IGF1R	153.792	70.081	32.8581	33.1931	3.38939	1.76102
MOB1A	153.792	72.7764	35.9385	47.8599	2.70373	1.43495
G3BP2	153.792	72.7764	43.6396	44.7721	2.56265	1.35764
TMED9	153.792	75.4719	29.2642	42.4563	3.19663	1.67655
DLST	153.792	87.6013	26.1838	33.1931	4.06544	2.02341
SERPINH1	153.792	88.949	35.9385	50.1757	2.81883	1.4951
E2F4	153.792	90.2967	34.3983	43.2283	3.1444	1.65278
SPEN	153.792	90.2967	37.4787	41.6844	3.08336	1.62451
CORO1B	153.792	90.2967	39.5324	44.7721	2.89532	1.53372
GOLGA4	153.792	91.6444	40.0458	40.1405	3.06083	1.61392
ID1	153.792	97.0352	40.0458	57.1231	2.58136	1.36813
ZHX1	153.792	99.7307	37.9921	54.0353	2.75486	1.46198
POGK	153.792	101.078	35.4251	35.5089	3.59306	1.84521
CDC42	153.792	105.122	51.3407	71.7898	2.10276	1.07228
IVNS1ABP	153.792	113.208	49.2871	54.0353	2.58414	1.36969
RTN4	153.792	115.903	58.5284	72.5617	2.05733	1.04077
ENY2	153.792	130.728	49.8005	67.9301	2.4167	1.27304
AKR1C3	153.792	198.114	119.11	108.071	1.54901	0.631346
SERINC3	151.742	48.5176	33.3715	30.8773	3.11693	1.64013
NUPR1	151.742	51.213	16.9424	20.8422	5.37135	2.42529
SNHG1	151.742	52.5608	27.2106	27.7896	3.71458	1.8932
PRELID3B	151.742	57.9516	32.8581	47.0879	2.62294	1.39118
SRP9	151.742	66.0379	30.291	38.5967	3.16137	1.66055
THBS1	151.742	70.081	33.8849	41.6844	2.93535	1.55353
GDI1	151.742	86.2535	32.3447	37.0528	3.42945	1.77798
LRP5	151.742	87.6013	27.2106	37.8247	3.6802	1.87978
HIF1A	151.742	88.949	39.019	40.1405	3.04058	1.60435
AAMP	151.742	88.949	44.153	43.2283	2.75449	1.46178
CPSF6	151.742	90.2967	35.9385	43.2283	3.05732	1.61227
WWC3	151.742	91.6444	31.8312	37.8247	3.49411	1.80493
PSMD3	151.742	91.6444	50.8273	58.6669	2.22282	1.15239
TM9SF2	151.742	94.3398	29.7776	43.2283	3.37071	1.75305
MLPH	151.742	94.3398	56.9882	57.895	2.14201	1.09897
ATP5F1E	151.742	97.0352	44.153	49.4037	2.6591	1.41094
PSMA5	151.742	97.0352	44.6664	63.2985	2.30424	1.20429
SYNGR2	151.742	103.774	44.153	59.4389	2.46656	1.3025
PGAM1	151.742	109.165	53.9078	61.7547	2.25576	1.17361
ADNP	149.691	49.8653	26.1838	29.3335	3.59449	1.84579
SPPL2A	149.691	55.2562	30.291	39.3686	2.94212	1.55686
M6PR	149.691	59.2993	40.5592	42.4563	2.51749	1.33198
PRPF4B	149.691	66.0379	26.6972	25.4738	4.13504	2.0479
GTF2I	149.691	67.3856	24.6435	32.4212	3.80404	1.92753
CPT1A	149.691	72.7764	41.586	38.5967	2.77451	1.47223
VAPA	149.691	79.515	44.153	41.6844	2.67023	1.41697
ABCA3	149.691	80.8627	27.724	45.5441	3.14671	1.65385
HDAC1	149.691	84.9058	43.6396	40.9125	2.77458	1.47227
DGKZ	149.691	84.9058	33.3715	51.7195	2.75701	1.4631
TARS1	149.691	90.2967	31.8312	32.4212	3.73507	1.90114
SMARCC1	149.691	90.2967	29.7776	42.4563	3.32237	1.73221
ZC3H18	149.691	90.2967	30.291	46.316	3.13271	1.64741
RTN3	149.691	92.9921	41.0726	34.737	3.20122	1.67862
CRABP2	149.691	94.3398	36.9653	55.5792	2.6369	1.39884
PPP4C	149.691	95.6875	35.9385	37.8247	3.32657	1.73404
PSMB1	149.691	95.6875	43.1262	58.6669	2.41056	1.26937
C11orf58	149.691	97.0352	36.4519	44.0002	3.06675	1.61671
TRIM44	149.691	101.078	34.3983	43.2283	3.23046	1.69174
C1QBP	149.691	101.078	59.0418	73.3337	1.89438	0.921725
HM13	149.691	105.122	47.7469	54.8073	2.48466	1.31305
PARK7	149.691	106.469	46.2067	62.5266	2.35586	1.23625
CCT8	149.691	107.817	55.9614	58.6669	2.24646	1.16765
PAICS	149.691	118.599	56.9882	62.5266	2.24482	1.1666
CORO1C	149.691	119.946	51.3407	65.6143	2.30548	1.20507
SRPRA	149.691	125.337	42.6128	53.2634	2.86858	1.52033
PCNA	149.691	138.814	63.6625	63.2985	2.27239	1.18421
CAP1	149.691	156.335	56.9882	57.1231	2.68182	1.42321
ATP9A	147.64	55.2562	19.5095	27.0177	4.36082	2.1246
AC005332.6	147.64	57.9516	24.1301	30.1054	3.79073	1.92247
TBC1D16	147.64	59.2993	39.5324	35.5089	2.75768	1.46345
BRD4	147.64	60.647	28.2374	32.4212	3.43377	1.77979
ESD	147.64	63.3424	27.724	27.7896	3.80056	1.92621
SSR2	147.64	63.3424	27.724	50.9476	2.68182	1.42321
TCEAL4	147.64	64.6902	28.7508	33.9651	3.3856	1.75941
TMEM123	147.64	64.6902	39.019	36.2809	2.8198	1.49559
ZNF598	147.64	67.3856	33.8849	38.5967	2.96663	1.56883
EIF4G3	147.64	70.081	30.291	42.4563	2.99284	1.58152
NUFIP2	147.64	71.4287	39.019	41.6844	2.7145	1.44069
UBE4A	147.64	72.7764	27.2106	27.0177	4.06461	2.02312
GDE1	147.64	75.4719	29.2642	33.1931	3.57223	1.83683
ADGRG1	147.64	75.4719	28.7508	39.3686	3.27531	1.71163
KCTD3	147.64	76.8196	33.8849	44.7721	2.85366	1.51281
UPF1	147.64	76.8196	52.3675	54.0353	2.10953	1.07692
ECT2	147.64	79.515	27.2106	44.7721	3.15569	1.65796
BZW2	147.64	79.515	40.0458	42.4563	2.75333	1.46118
TAOK2	147.64	83.5581	37.9921	53.2634	2.53353	1.34115
CITED2	147.64	84.9058	23.6167	44.0002	3.43917	1.78206
PUF60	147.64	87.6013	52.3675	57.895	2.13347	1.0932
TYMS	147.64	90.2967	38.5055	44.7721	2.85715	1.51458
CYCS	147.64	90.2967	43.1262	64.0705	2.21963	1.15032
SOD1	147.64	92.9921	46.2067	43.2283	2.69059	1.42792
EIF2S2	147.64	97.0352	46.2067	51.7195	2.49857	1.3211
SYAP1	147.64	98.3829	40.5592	50.9476	2.68858	1.42685
ATP6V0D1	147.64	102.426	41.586	55.5792	2.57362	1.3638
UBQLN1	147.64	102.426	39.019	60.2108	2.52008	1.33347
STRAP	147.64	128.033	44.153	57.1231	2.722	1.44466
MPRIP	147.64	130.728	46.2067	55.5792	2.73484	1.45146
BASP1	147.64	136.119	48.2603	44.7721	3.05011	1.60886
PHC2	147.64	148.248	32.3447	67.9301	2.95078	1.5611
ZFHX3	145.59	63.3424	36.9653	38.5967	2.76505	1.4673
SLC7A1	145.59	64.6902	34.3983	44.0002	2.6822	1.42341
RALY	145.59	66.0379	41.0726	41.6844	2.55722	1.35458
SKP1	145.59	67.3856	40.0458	44.0002	2.53404	1.34144
ZNRF1	145.59	68.7333	31.3178	43.2283	2.87504	1.52358
XPO5	145.59	72.7764	36.4519	34.737	3.06742	1.61703
OLA1	145.59	78.1673	34.3983	35.5089	3.20077	1.67842
ALDH18A1	145.59	79.515	33.3715	39.3686	3.09465	1.62977
GLYR1	145.59	79.515	37.9921	51.7195	2.5092	1.32723
BRIP1	145.59	88.949	25.157	40.1405	3.59185	1.84473
MYO1C	145.59	94.3398	63.6625	60.9827	1.9249	0.944784
APMAP	145.59	101.078	40.5592	57.895	2.50541	1.32505
DNAJA1	145.59	125.337	60.0686	71.7898	2.05468	1.03891
ATP8B2	143.539	37.7359	10.7816	24.7019	5.10873	2.35296
SEL1L	143.539	56.6039	28.2374	37.0528	3.06544	1.61609
NNT	143.539	60.647	23.1033	28.5615	3.95213	1.98263
H2AJ	143.539	66.0379	20.5363	35.5089	3.73943	1.90282
BIRC6	143.539	75.4719	31.3178	35.5089	3.2773	1.71251
NUTF2	143.539	75.4719	35.4251	53.2634	2.46944	1.30419
DST	143.539	76.8196	37.4787	39.3686	2.86749	1.51979
LITAF	143.539	84.9058	39.5324	44.7721	2.70976	1.43817
GPRC5A	143.539	86.2535	36.9653	29.3335	3.46602	1.79328
CTBP2	143.539	87.6013	35.9385	50.1757	2.68412	1.42445
SEPHS2	143.539	92.9921	41.586	40.9125	2.8671	1.51959
H3-3A	143.539	97.0352	34.3983	46.316	2.98057	1.57559
SCRIB	143.539	98.3829	34.3983	45.5441	3.02621	1.59751
UBE2Z	143.539	102.426	42.6128	61.7547	2.35672	1.23678
IARS2	143.539	103.774	36.9653	55.5792	2.67237	1.41812
IER2	141.489	51.213	25.157	26.2457	3.74887	1.90645
TP53	141.489	56.6039	27.724	17.7545	4.35575	2.12292
PI4KB	141.489	59.2993	32.3447	43.2283	2.65688	1.40973
MRPS34	141.489	64.6902	43.1262	54.8073	2.1053	1.07402
MKRN1	141.489	67.3856	21.0497	27.0177	4.34545	2.11951
TERF2IP	141.489	67.3856	24.1301	37.0528	3.41393	1.77143
NCOA4	141.489	75.4719	29.2642	44.0002	2.96134	1.56625
DCTN2	141.489	75.4719	35.9385	45.5441	2.66266	1.41287
ATRX	141.489	76.8196	33.8849	38.5967	3.01192	1.59068
FAM91A1	141.489	80.8627	35.4251	37.0528	3.06785	1.61723
URI1	141.489	80.8627	31.8312	42.4563	2.99312	1.58165
SHTN1	141.489	84.9058	31.3178	46.316	2.91618	1.54408
TSPAN13	141.489	84.9058	40.0458	47.8599	2.57543	1.36481
ECE1	141.489	91.6444	32.3447	35.5089	3.43583	1.78066
NDUFA4	141.489	95.6875	41.0726	37.8247	3.00614	1.58791
SNRPD2	141.489	98.3829	47.7469	54.8073	2.33898	1.22588
BCL2L1	141.489	101.078	41.0726	51.7195	2.61409	1.38631
EIF4A3	141.489	107.817	47.2335	50.1757	2.55937	1.35579
CALU	141.489	109.165	35.4251	38.5967	3.38621	1.75967
ZKSCAN1	139.438	48.5176	24.6435	25.4738	3.75031	1.90701
MIDEAS	139.438	52.5608	20.0229	30.8773	3.77207	1.91535
CHD6	139.438	55.2562	20.0229	28.5615	4.00734	2.00265
CCNG1	139.438	55.2562	22.0765	31.6493	3.62385	1.85752
PBX1	139.438	59.2993	49.2871	59.4389	1.82788	0.870168
MAPK8IP3	139.438	60.647	18.4827	26.2457	4.47334	2.16135
GPAA1	139.438	60.647	36.9653	43.2283	2.49503	1.31906
STAU1	139.438	61.9947	24.6435	47.0879	2.80815	1.48962
COPB1	139.438	64.6902	30.8044	44.0002	2.72882	1.44828
MAPK1	139.438	68.7333	34.9117	33.1931	3.05663	1.61194
A2M	139.438	71.4287	36.9653	49.4037	2.44146	1.28775
PLD3	139.438	72.7764	29.7776	31.6493	3.45475	1.78858
NPEPPS	139.438	72.7764	34.9117	45.5441	2.63766	1.39926
SUN1	139.438	75.4719	32.3447	37.0528	3.0968	1.63078
RRBP1	139.438	75.4719	36.9653	33.9651	3.02987	1.59926
RALBP1	139.438	82.2104	40.5592	34.737	2.94369	1.55763
ST14	139.438	82.2104	35.4251	46.316	2.71159	1.43914
PPL	139.438	82.2104	37.4787	53.2634	2.44262	1.28843
NASP	139.438	83.5581	37.4787	47.0879	2.63693	1.39886
LRRFIP1	139.438	86.2535	36.9653	37.8247	3.01767	1.59344
IGF2R	139.438	91.6444	31.3178	39.3686	3.26912	1.7089
ATP5MC3	139.438	92.9921	45.1798	56.3511	2.28926	1.19488
PLK2	139.438	102.426	25.157	53.2634	3.0842	1.6249
NECTIN2	139.438	106.469	42.6128	48.6318	2.69504	1.4303
VDAC2	139.438	109.165	53.9078	62.5266	2.13513	1.09433
CDC42BPG	139.438	114.555	16.429	20.0703	6.95886	2.79885
STMN1	137.388	49.8653	27.2106	32.4212	3.14015	1.65084
TACC1	137.388	52.5608	31.3178	45.5441	2.47129	1.30527
MDM2	137.388	56.6039	21.5631	27.0177	3.99317	1.99754
NFAT5	137.388	57.9516	64.6893	40.9125	1.84977	0.887348
ESRP1	137.388	59.2993	15.9156	22.3861	5.1352	2.36042
SRP72	137.388	59.2993	30.8044	30.1054	3.22915	1.69115
GNPTAB	137.388	59.2993	27.2106	37.8247	3.02431	1.59661
DNAJC5	137.388	60.647	25.6704	33.1931	3.3643	1.75031
AGPAT3	137.388	63.3424	21.0497	37.8247	3.40946	1.76954
CXXC5	137.388	64.6902	30.291	33.9651	3.14488	1.65301
H2AZ2	137.388	67.3856	31.8312	46.316	2.62035	1.38976
CEP350	137.388	68.7333	18.9961	30.8773	4.13288	2.04715
CTSD	137.388	75.4719	35.9385	30.1054	3.223	1.6884
SBNO1	137.388	78.1673	30.291	32.4212	3.43721	1.78124
POLE3	137.388	78.1673	32.8581	44.0002	2.80458	1.48778
ADIPOR1	137.388	78.1673	40.0458	57.895	2.20087	1.13807
PANK3	137.388	82.2104	26.6972	37.8247	3.40346	1.767
SLC25A1	137.388	83.5581	30.8044	39.3686	3.14858	1.6547
EID1	137.388	84.9058	29.7776	37.0528	3.32623	1.73389
HTATSF1	137.388	90.2967	40.5592	42.4563	2.74267	1.45558
ABCE1	137.388	95.6875	47.7469	52.4915	2.32521	1.21736
NUDC	137.388	95.6875	42.0994	66.3863	2.14844	1.10329
LAMTOR1	137.388	97.0352	29.7776	43.2283	3.21101	1.68303
DCAF13	137.388	102.426	32.8581	47.0879	2.9997	1.58482
PSMD8	137.388	119.946	47.7469	69.474	2.19529	1.13441
VIM	137.388	172.507	97.034	99.5794	1.57616	0.656417
AMOTL2	135.337	53.9085	32.8581	35.5089	2.76808	1.46889
EIF3L	135.337	56.6039	23.6167	23.158	4.10352	2.03686
LAMB2	135.337	60.647	23.1033	30.1054	3.68331	1.881
CACYBP	135.337	64.6902	33.3715	37.0528	2.84032	1.50605
ERBB2	135.337	71.4287	23.6167	27.0177	4.0835	2.02981
GNPNAT1	135.337	72.7764	40.0458	38.5967	2.64633	1.40399
MRPL3	135.337	72.7764	39.019	57.895	2.1474	1.10259
SIKE1	135.337	75.4719	24.1301	32.4212	3.72774	1.8983
LONP1	135.337	75.4719	25.157	32.4212	3.66127	1.87234
PSMD12	135.337	79.515	34.9117	45.5441	2.67044	1.41708
YES1	135.337	80.8627	36.4519	42.4563	2.73989	1.45412
ANXA7	135.337	83.5581	37.9921	37.0528	2.91685	1.54441
PHLDA3	135.337	84.9058	25.6704	37.8247	3.46866	1.79438
MCMBP	135.337	86.2535	31.8312	44.0002	2.92215	1.54703
MED1	135.337	86.2535	34.9117	50.1757	2.60427	1.38088
PAFAH1B1	135.337	86.2535	54.4212	55.5792	2.01445	1.01039
COX7C	135.337	90.2967	42.6128	48.6318	2.47284	1.30617
CLNS1A	135.337	91.6444	31.8312	37.8247	3.25861	1.70426
TALDO1	135.337	114.555	53.9078	60.2108	2.18976	1.13077
TXN	135.337	118.599	59.5552	73.3337	1.91089	0.934242
RRM2	135.337	121.294	56.4748	64.0705	2.12892	1.09012
TOMM40	135.337	146.901	62.1223	74.8775	2.06013	1.04274
PDPK1	133.286	53.9085	21.0497	40.9125	3.02112	1.59508
EIF2AK2	133.286	56.6039	22.5899	20.8422	4.37212	2.12833
SDC4	133.286	60.647	23.1033	23.158	4.19213	2.06768
TOMM70	133.286	60.647	23.1033	38.5967	3.14317	1.65222
WASF2	133.286	66.0379	32.3447	42.4563	2.66473	1.41399
ZC3H14	133.286	68.7333	24.6435	27.0177	3.91047	1.96734
ZFAND3	133.286	71.4287	31.3178	37.0528	2.9942	1.58217
SF3A1	133.286	72.7764	28.2374	32.4212	3.39709	1.7643
CBX1	133.286	72.7764	39.019	52.4915	2.2518	1.17108
SLC2A1	133.286	74.1241	42.6128	61.7547	1.98731	0.990818
TMEM183A	133.286	78.1673	29.2642	31.6493	3.47138	1.79551
MTA1	133.286	82.2104	29.7776	33.1931	3.42217	1.77491
TMEM132A	133.286	82.2104	28.2374	48.6318	2.80342	1.48719
GIPC1	133.286	83.5581	32.3447	45.5441	2.78403	1.47718
SSR1	133.286	84.9058	34.9117	39.3686	2.93742	1.55455
API5	133.286	86.2535	41.0726	42.4563	2.62831	1.39414
NRBP1	133.286	87.6013	29.7776	43.2283	3.02562	1.59723
LMNB1	133.286	88.949	35.9385	46.316	2.7018	1.43392
PFDN5	133.286	92.9921	41.0726	29.3335	3.21391	1.68433
FXR1	133.286	92.9921	25.6704	46.316	3.14335	1.6523
VARS1	133.286	95.6875	26.6972	45.5441	3.16957	1.66429
PPA1	133.286	95.6875	47.2335	56.3511	2.2105	1.14437
MGAT4B	133.286	133.423	41.586	62.5266	2.56175	1.35713
PDXK	133.286	152.291	50.8273	59.4389	2.5899	1.37289
AC104793.1	131.236	26.9542	14.3754	13.8948	5.59565	2.48431
NEBL	131.236	47.1699	17.4558	30.1054	3.75108	1.9073
USP1	131.236	48.5176	22.5899	32.4212	3.26759	1.70823
GRK2	131.236	48.5176	27.2106	30.8773	3.09451	1.62971
PCF11	131.236	48.5176	31.8312	31.6493	2.83163	1.50163
SGSM2	131.236	51.213	20.0229	22.3861	4.30213	2.10505
PLXNA1	131.236	55.2562	30.8044	24.7019	3.35984	1.74839
BRWD1	131.236	56.6039	17.9693	27.7896	4.10499	2.03738
SLC39A6	131.236	57.9516	23.1033	24.7019	3.95747	1.98458
OXCT1	131.236	61.9947	27.2106	32.4212	3.2404	1.69617
PACS1	131.236	63.3424	26.6972	28.5615	3.52123	1.81608
CHD1	131.236	63.3424	33.3715	33.9651	2.88964	1.53089
DENR	131.236	64.6902	31.3178	37.0528	2.86565	1.51886
SLIT1	131.236	66.0379	21.5631	27.0177	4.06074	2.02174
SLTM	131.236	66.0379	41.586	33.1931	2.63809	1.39949
POLD2	131.236	68.7333	35.9385	39.3686	2.65538	1.40892
CPSF7	131.236	70.081	29.7776	51.7195	2.47023	1.30465
DAG1	131.236	71.4287	22.0765	33.1931	3.66683	1.87454
RBM12	131.236	71.4287	24.6435	35.5089	3.36918	1.7524
HMCES	131.236	71.4287	31.3178	33.1931	3.14155	1.65148
SENP6	131.236	74.1241	26.1838	35.5089	3.32876	1.73498
DUSP16	131.236	74.1241	28.7508	34.737	3.23464	1.6936
NCOR1	131.236	78.1673	52.3675	43.2283	2.19051	1.13126
KDM5B	131.236	80.8627	24.6435	32.4212	3.71681	1.89406
NUP107	131.236	82.2104	29.7776	42.4563	2.95493	1.56312
PRELID1	131.236	84.9058	40.5592	54.8073	2.26643	1.18042
SP3	131.236	87.6013	55.448	73.3337	1.69929	0.764931
IMMT	131.236	90.2967	35.9385	36.2809	3.0675	1.61706
ENAH	131.236	90.2967	38.5055	40.9125	2.78945	1.47998
REPIN1	131.236	91.6444	30.291	38.5967	3.23542	1.69395
SLC35B2	131.236	92.9921	31.8312	34.737	3.36839	1.75206
UQCRH	131.236	92.9921	42.0994	40.1405	2.72651	1.44706
SLC7A6	131.236	97.0352	30.8044	44.7721	3.0204	1.59474
CALM3	131.236	97.0352	29.2642	53.2634	2.766	1.4678
PSMA4	131.236	99.7307	47.7469	50.1757	2.35867	1.23797
RAF1	131.236	107.817	37.9921	55.5792	2.55477	1.35319
SLC11A2	129.185	26.9542	17.4558	21.6141	3.99641	1.9987
HLTF	129.185	40.4313	23.1033	31.6493	3.09788	1.63128
SUCO	129.185	44.4745	20.5363	30.8773	3.3777	1.75604
PPP6R1	129.185	55.2562	39.5324	55.5792	1.93921	0.955471
C3orf14	129.185	57.9516	25.157	18.5264	4.28394	2.09894
FAR1	129.185	57.9516	25.157	25.4738	3.69611	1.88601
DUS1L	129.185	57.9516	31.8312	40.9125	2.57255	1.3632
PPP1R15B	129.185	60.647	34.9117	40.9125	2.50359	1.324
CST3	129.185	61.9947	25.6704	40.1405	2.90499	1.53853
KMT2B	129.185	63.3424	29.7776	31.6493	3.13426	1.64812
DVL3	129.185	63.3424	32.8581	30.8773	3.02074	1.5949
BOD1	129.185	63.3424	29.2642	41.6844	2.71362	1.44022
CLDN4	129.185	66.0379	29.2642	52.4915	2.38789	1.25573
SEMA3C	129.185	67.3856	30.291	24.7019	3.57448	1.83773
ARFGAP2	129.185	67.3856	31.8312	40.9125	2.70224	1.43416
CEBPG	129.185	70.081	17.4558	30.8773	4.12277	2.04361
SELENOI	129.185	70.081	23.1033	29.3335	3.80013	1.92605
UBE2L3	129.185	70.081	37.4787	54.8073	2.15923	1.11051
LARP4	129.185	71.4287	29.7776	34.737	3.10959	1.63672
SLC25A29	129.185	72.7764	27.2106	37.0528	3.14272	1.65201
ANKRD17	129.185	72.7764	31.3178	33.1931	3.13066	1.64647
TAOK1	129.185	72.7764	33.3715	32.4212	3.06967	1.61808
ASH1L	129.185	75.4719	17.4558	32.4212	4.10323	2.03676
EFCAB14	129.185	79.515	31.8312	32.4212	3.24813	1.69961
CD46	129.185	82.2104	36.4519	42.4563	2.67901	1.4217
PEG10	129.185	92.9921	28.7508	27.0177	3.98393	1.99419
ANP32A	129.185	92.9921	42.6128	51.7195	2.35526	1.23589
EI24	129.185	99.7307	36.4519	40.9125	2.95893	1.56508
AK2	129.185	106.469	37.9921	46.316	2.79516	1.48293
KPNA4	129.185	110.512	59.0418	54.8073	2.1054	1.07409
UQCRFS1	129.185	115.903	41.0726	47.8599	2.7559	1.46252
ODC1	129.185	118.599	47.2335	62.5266	2.25751	1.17473
UBL3	127.135	37.7359	22.5899	40.9125	2.59629	1.37645
POGZ	127.135	44.4745	27.2106	25.4738	3.25731	1.70368
KMT2C	127.135	45.8222	26.6972	27.0177	3.21991	1.68702
PAN2	127.135	49.8653	20.0229	21.6141	4.25103	2.08781
PNRC2	127.135	49.8653	17.4558	29.3335	3.78292	1.9195
BMPR2	127.135	49.8653	27.2106	30.8773	3.04711	1.60744
EIF3J	127.135	53.9085	18.4827	28.5615	3.84837	1.94425
ADCY6	127.135	53.9085	26.1838	29.3335	3.26103	1.70533
EIF3F	127.135	53.9085	28.7508	29.3335	3.11691	1.64012
SYPL1	127.135	55.2562	25.157	37.0528	2.93187	1.55182
ATP2C1	127.135	56.6039	32.3447	39.3686	2.56213	1.35734
CLTA	127.135	56.6039	31.8312	45.5441	2.37464	1.24771
ARL8B	127.135	57.9516	24.6435	17.7545	4.36545	2.12613
SOX4	127.135	61.9947	15.9156	32.4212	3.91274	1.96818
VEGFA	127.135	63.3424	18.9961	16.9825	5.29418	2.40441
TCF25	127.135	64.6902	31.8312	45.5441	2.47915	1.30985
NOP58	127.135	67.3856	31.8312	55.5792	2.22537	1.15404
FOXM1	127.135	68.7333	35.4251	50.1757	2.28816	1.19419
PLOD2	127.135	72.7764	22.0765	42.4563	3.09782	1.63125
ZFAND5	127.135	75.4719	72.9038	71.0179	1.40776	0.493398
NUP205	127.135	78.1673	36.4519	40.9125	2.6537	1.40801
NBEAL2	127.135	82.2104	32.3447	36.2809	3.05054	1.60907
CDK2AP1	127.135	82.2104	40.0458	67.9301	1.93881	0.955175
NOP56	127.135	92.9921	49.8005	45.5441	2.30875	1.20711
NHP2	127.135	94.3398	32.3447	44.7721	2.87194	1.52202
RNF40	127.135	102.426	49.2871	58.6669	2.12647	1.08846
SRRT	127.135	109.165	45.6932	37.8247	2.82932	1.50046
HES1	125.084	30.9974	20.5363	13.1229	4.63712	2.21323
UBXN1	125.084	35.0405	20.5363	28.5615	3.26134	1.70547
CUL4B	125.084	43.1268	18.4827	26.2457	3.76072	1.91101
PCM1	125.084	49.8653	32.3447	30.8773	2.76723	1.46844
SKA2	125.084	52.5608	19.5095	27.0177	3.81809	1.93285
GIGYF1	125.084	55.2562	17.4558	23.9299	4.35755	2.12352
NCBP2	125.084	55.2562	22.5899	27.0177	3.63534	1.86209
PTPRJ	125.084	57.9516	24.6435	31.6493	3.2515	1.7011
PPP2R5E	125.084	57.9516	24.1301	37.8247	2.95434	1.56284
NUP188	125.084	57.9516	28.2374	40.9125	2.64694	1.40433
HMG20B	125.084	59.2993	20.0229	28.5615	3.79512	1.92414
MCM3AP	125.084	59.2993	34.9117	39.3686	2.48227	1.31166
PITPNA	125.084	60.647	25.6704	23.158	3.80376	1.92743
CCNB1	125.084	61.9947	26.6972	44.0002	2.64619	1.40392
AP1M2	125.084	63.3424	18.4827	20.8422	4.79154	2.26049
MANEAL	125.084	63.3424	23.1033	50.9476	2.54456	1.34741
DNAJC8	125.084	63.3424	29.7776	46.316	2.47625	1.30816
AR	125.084	64.6902	28.7508	18.5264	4.01408	2.00507
PCK2	125.084	67.3856	19.5095	23.158	4.51093	2.17342
RAPGEF1	125.084	70.081	23.6167	31.6493	3.53138	1.82023
IL6ST	125.084	72.7764	39.5324	28.5615	2.9057	1.53889
SEC16A	125.084	74.1241	32.8581	33.1931	3.01597	1.59262
PRMT6	125.084	78.1673	34.9117	53.2634	2.30509	1.20482
CMTM4	125.084	79.515	31.3178	38.5967	2.92642	1.54914
PRPF40A	125.084	79.515	36.4519	38.5967	2.72622	1.4469
SORT1	125.084	79.515	31.3178	44.0002	2.71647	1.44173
CLIP1	125.084	82.2104	27.724	37.0528	3.20014	1.67813
PES1	125.084	84.9058	47.2335	50.9476	2.1388	1.0968
RANBP1	125.084	86.2535	39.019	45.5441	2.49918	1.32145
SEPHS1	125.084	90.2967	34.3983	22.3861	3.79296	1.92333
MAPRE1	125.084	90.2967	51.8541	48.6318	2.14339	1.0999
CHMP1A	125.084	98.3829	43.1262	62.5266	2.11511	1.08073
RUVBL2	125.084	102.426	35.9385	45.5441	2.79213	1.48137
DDX1	125.084	105.122	43.6396	40.9125	2.72265	1.44501
METRN	125.084	123.989	39.5324	50.1757	2.77649	1.47326
ANXA1	125.084	198.114	76.4977	70.2459	2.20247	1.13912
BTG2	123.034	40.4313	15.4022	19.2983	4.71073	2.23595
TRAFD1	123.034	44.4745	16.9424	37.8247	3.05855	1.61285
KHNYN	123.034	48.5176	14.3754	20.0703	4.98034	2.31625
PHF10	123.034	48.5176	18.9961	26.2457	3.79188	1.92291
C14orf132	123.034	49.8653	28.2374	28.5615	3.04405	1.60599
PPP4R3B	123.034	51.213	24.1301	31.6493	3.12385	1.64333
HECTD4	123.034	53.9085	28.7508	29.3335	3.0463	1.60706
TRIM8	123.034	56.6039	15.4022	22.3861	4.75379	2.24908
MAN1A2	123.034	56.6039	26.1838	30.1054	3.19133	1.67416
PKN1	123.034	57.9516	27.2106	29.3335	3.20078	1.67843
ABHD12	123.034	60.647	16.9424	25.4738	4.33043	2.11451
SUMO1	123.034	60.647	34.9117	44.0002	2.32767	1.21889
PLK1	123.034	63.3424	23.1033	33.1931	3.31062	1.7271
MCRS1	123.034	63.3424	28.7508	42.4563	2.61738	1.38812
GID8	123.034	64.6902	23.1033	39.3686	3.00493	1.58733
PHF3	123.034	66.0379	35.4251	44.7721	2.35758	1.23731
UQCRC1	123.034	67.3856	28.2374	29.3335	3.30756	1.72577
PACS2	123.034	68.7333	28.2374	37.0528	2.93715	1.55442
CCDC6	123.034	72.7764	17.9693	33.9651	3.77034	1.9147
TBL1X	123.034	72.7764	37.9921	49.4037	2.2405	1.16382
CIAO1	123.034	75.4719	24.6435	33.9651	3.38697	1.75999
RBM17	123.034	76.8196	31.8312	54.8073	2.30675	1.20586
THRAP3	123.034	76.8196	39.5324	55.5792	2.10125	1.07125
PARP1	123.034	79.515	45.6932	50.9476	2.09589	1.06756
ROBO1	123.034	82.2104	33.3715	37.8247	2.8828	1.52747
AP2A1	123.034	83.5581	31.3178	30.1054	3.36341	1.74993
SND1	123.034	86.2535	32.8581	41.6844	2.80762	1.48935
BCCIP	123.034	88.949	34.9117	50.9476	2.46895	1.3039
MCFD2	123.034	97.0352	35.4251	37.0528	3.03636	1.60234
PPP2CA	123.034	105.122	40.5592	37.0528	2.93969	1.55566
SUPT6H	123.034	106.469	43.1262	56.3511	2.30709	1.20607
PFKFB3	123.034	109.165	45.6932	40.9125	2.6811	1.42282
CREBZF	123.034	110.512	31.8312	39.3686	3.28015	1.71376
SERPINE1	123.034	181.941	65.2027	91.8601	1.94174	0.957348
ALDH1L2	120.983	33.6928	13.862	12.3509	5.90075	2.5609
KLHDC4	120.983	35.0405	27.724	32.4212	2.59412	1.37524
HELZ	120.983	41.7791	17.9693	19.2983	4.36739	2.12677
PURA	120.983	44.4745	26.6972	31.6493	2.83578	1.50375
GNAI3	120.983	47.1699	30.291	30.1054	2.78416	1.47724
COX7A2	120.983	47.1699	36.9653	26.2457	2.66018	1.41153
SPRYD3	120.983	47.1699	25.6704	40.1405	2.55509	1.35338
NOP14	120.983	51.213	29.7776	41.6844	2.40962	1.2688
HDAC7	120.983	52.5608	28.7508	21.6141	3.44573	1.78481
PRKAA1	120.983	53.9085	22.5899	24.7019	3.69814	1.8868
DIDO1	120.983	53.9085	31.8312	30.1054	2.82372	1.4976
ARFGEF2	120.983	55.2562	25.6704	25.4738	3.44593	1.78489
GOLGA3	120.983	59.2993	26.6972	31.6493	3.08986	1.62754
BRI3BP	120.983	60.647	36.9653	46.316	2.18092	1.12494
HNRNPH2	120.983	63.3424	22.5899	30.1054	3.49795	1.80651
MRPS23	120.983	63.3424	33.3715	47.0879	2.29091	1.19592
UBE2Q1	120.983	64.6902	61.6089	50.1757	1.66099	0.732046
BAMBI	120.983	66.0379	21.0497	16.9825	4.91743	2.29791
ABHD2	120.983	66.0379	35.4251	25.4738	3.07101	1.61871
PTTG1IP	120.983	66.0379	29.7776	47.0879	2.43309	1.28279
NECTIN1	120.983	66.0379	31.3178	50.9476	2.27338	1.18484
USP24	120.983	67.3856	23.1033	23.9299	4.00501	2.00181
TSPYL1	120.983	67.3856	27.2106	44.7721	2.61686	1.38784
UQCRC2	120.983	67.3856	33.3715	55.5792	2.11768	1.08248
KDM1A	120.983	68.7333	33.3715	42.4563	2.50194	1.32305
RAP2C	120.983	70.081	23.1033	31.6493	3.48959	1.80306
CAMK2N1	120.983	71.4287	27.2106	23.9299	3.76241	1.91166
LY6E	120.983	71.4287	20.0229	36.2809	3.41739	1.77289
SLC5A6	120.983	72.7764	21.0497	34.737	3.47322	1.79627
ZC3H7B	120.983	72.7764	24.6435	32.4212	3.39543	1.7636
NOTCH3	120.983	72.7764	42.6128	37.0528	2.43216	1.28224
H1-0	120.983	79.515	32.8581	21.6141	3.68074	1.88
AKAP1	120.983	80.8627	35.4251	44.0002	2.54133	1.34558
PERP	120.983	84.9058	33.3715	35.5089	2.98908	1.5797
HSPH1	120.983	88.949	49.2871	47.0879	2.17828	1.12319
CAD	120.983	102.426	39.5324	40.9125	2.77717	1.47362
ITGB5	120.983	107.817	43.6396	52.4915	2.38008	1.25101
ZNF207	120.983	110.512	53.3944	45.5441	2.33979	1.22638
UBE2M	118.933	41.7791	33.3715	45.5441	2.0365	1.02609
IBTK	118.933	45.8222	24.1301	38.5967	2.62654	1.39317
GPBP1L1	118.933	48.5176	13.3486	23.9299	4.49187	2.16732
KIAA0513	118.933	52.5608	23.6167	30.1054	3.19223	1.67456
ZCCHC14	118.933	53.9085	18.4827	30.1054	3.55727	1.83077
MAF1	118.933	53.9085	26.1838	30.8773	3.02905	1.59887
COX6C	118.933	55.2562	22.5899	38.5967	2.84685	1.50936
SNHG19	118.933	60.647	18.9961	22.3861	4.33954	2.11754
BOP1	118.933	61.9947	27.724	40.1405	2.66601	1.41468
MID1IP1	118.933	66.0379	18.9961	20.8422	4.64303	2.21507
MRTFB	118.933	66.0379	21.5631	23.158	4.13609	2.04827
PLXNA3	118.933	66.0379	20.5363	30.8773	3.59769	1.84707
ITGB4	118.933	67.3856	22.0765	32.4212	3.41883	1.7735
ATP6AP2	118.933	67.3856	29.2642	37.0528	2.80951	1.49032
RAI1	118.933	70.081	23.1033	27.0177	3.77115	1.915
DAP	118.933	71.4287	32.8581	41.6844	2.55373	1.35261
RPL36AL	118.933	72.7764	33.3715	46.316	2.40576	1.26649
ARGLU1	118.933	75.4719	37.4787	17.7545	3.5197	1.81545
GRSF1	118.933	75.4719	33.3715	34.737	2.85434	1.51315
HSF1	118.933	78.1673	25.157	37.8247	3.12948	1.64592
ITGA3	118.933	82.2104	35.9385	37.0528	2.75571	1.46242
BCAS2	118.933	86.2535	25.6704	38.5967	3.19271	1.67478
SAE1	118.933	86.2535	50.8273	43.2283	2.18154	1.12535
ATP1B1	118.933	90.2967	42.0994	37.8247	2.61785	1.38838
DICER1	118.933	92.9921	37.9921	36.2809	2.85332	1.51264
ZFP36L1	118.933	95.6875	30.291	43.2283	2.91924	1.54559
BRK1	118.933	95.6875	33.8849	53.2634	2.4627	1.30024
ABCC3	118.933	109.165	48.2603	40.1405	2.58026	1.36752
GABPB1-AS1	116.882	37.7359	16.9424	20.0703	4.17743	2.06262
RALGAPB	116.882	39.0836	16.429	28.5615	3.46663	1.79353
ALDH5A1	116.882	41.7791	17.4558	17.7545	4.5061	2.17188
PCNX1	116.882	49.8653	18.4827	22.3861	4.08007	2.02859
NAT10	116.882	49.8653	34.3983	36.2809	2.35922	1.23831
SCYL1	116.882	51.213	26.6972	27.7896	3.08506	1.6253
PHIP	116.882	51.213	23.1033	32.4212	3.0274	1.59808
RIC8A	116.882	55.2562	21.5631	35.5089	3.01616	1.59271
CMTR1	116.882	57.9516	23.1033	31.6493	3.19316	1.67498
PDXDC1	116.882	57.9516	26.1838	38.5967	2.69886	1.43235
TNKS2	116.882	59.2993	15.4022	23.9299	4.47932	2.16328
FNBP4	116.882	60.647	24.1301	24.7019	3.63551	1.86216
U2SURP	116.882	63.3424	31.8312	53.2634	2.11793	1.08265
ATP13A3	116.882	66.0379	17.9693	37.0528	3.32448	1.73313
PRPF3	116.882	66.0379	29.2642	28.5615	3.16329	1.66143
CAPZA1	116.882	67.3856	31.3178	41.6844	2.52414	1.33579
PTEN	116.882	68.7333	36.9653	26.2457	2.93644	1.55407
DYNLL1	116.882	68.7333	31.3178	37.8247	2.68453	1.42467
ADAM15	116.882	68.7333	32.8581	40.9125	2.51612	1.3312
NARS1	116.882	71.4287	31.8312	49.4037	2.3181	1.21294
EIF3G	116.882	76.8196	32.8581	36.2809	2.80163	1.48627
IQSEC1	116.882	78.1673	27.724	34.737	3.12274	1.64281
TSN	116.882	79.515	25.157	25.4738	3.87901	1.95569
CDK16	116.882	79.515	16.9424	43.2283	3.264	1.70664
SDF4	116.882	80.8627	36.4519	37.0528	2.69023	1.42773
APEH	116.882	84.9058	24.6435	20.8422	4.43629	2.14935
STOM	116.882	84.9058	29.7776	30.8773	3.32682	1.73414
SUB1	116.882	86.2535	37.9921	39.3686	2.62582	1.39277
LARP4B	116.882	94.3398	33.3715	27.7896	3.45353	1.78807
TIMELESS	116.882	98.3829	31.3178	54.0353	2.52205	1.3346
PGRMC1	116.882	99.7307	34.9117	44.7721	2.7184	1.44276
CCAR1	116.882	138.814	50.3139	81.053	1.94643	0.960829
ALDH3A1	116.882	154.987	82.6586	82.5969	1.64514	0.718213
WDR82	114.831	35.0405	19.5095	31.6493	2.92955	1.55068
CSAD	114.831	36.3882	14.8888	16.9825	4.74469	2.24631
YTHDF3	114.831	39.0836	25.157	30.1054	2.78517	1.47777
TMEM59	114.831	41.7791	22.5899	21.6141	3.5429	1.82493
CLEC3A	114.831	43.1268	11.8084	8.49127	7.78133	2.96002
SLC25A36	114.831	45.8222	20.5363	29.3335	3.22146	1.68772
RTL8C	114.831	45.8222	20.0229	30.8773	3.15625	1.65821
VTI1B	114.831	45.8222	23.6167	44.7721	2.34912	1.23212
GPT2	114.831	48.5176	15.4022	18.5264	4.81449	2.26738
ACACA	114.831	49.8653	17.9693	21.6141	4.16076	2.05685
TLK2	114.831	49.8653	23.1033	37.0528	2.73782	1.45303
KEAP1	114.831	51.213	23.6167	23.9299	3.49224	1.80415
SARAF	114.831	52.5608	22.0765	26.2457	3.46408	1.79247
WIZ	114.831	52.5608	21.5631	31.6493	3.14574	1.6534
TRA2A	114.831	53.9085	46.7201	37.0528	2.01426	1.01025
CEP170B	114.831	55.2562	34.9117	48.6318	2.03592	1.02568
JMJD8	114.831	59.2993	24.1301	24.7019	3.56591	1.83427
GALNT6	114.831	59.2993	23.6167	26.2457	3.49222	1.80414
FOXP4	114.831	63.3424	18.4827	27.7896	3.85056	1.94507
RNF187	114.831	63.3424	26.6972	32.4212	3.01385	1.59161
ZNF316	114.831	63.3424	20.5363	39.3686	2.97428	1.57254
ADIPOR2	114.831	63.3424	35.4251	43.2283	2.26531	1.17971
PPP1R14B	114.831	63.3424	37.9921	40.9125	2.25809	1.1751
PDCD4	114.831	64.6902	19.5095	13.8948	5.37421	2.42605
SPG7	114.831	64.6902	24.1301	36.2809	2.97167	1.57127
GGA2	114.831	64.6902	27.2106	44.7721	2.49395	1.31844
ABCA2	114.831	66.0379	27.724	33.1931	2.9691	1.57003
IL13RA1	114.831	66.0379	31.3178	40.1405	2.53111	1.33977
B2M	114.831	67.3856	30.291	24.7019	3.31346	1.72834
WWP2	114.831	68.7333	23.6167	30.1054	3.41693	1.7727
PMEPA1	114.831	70.081	28.2374	31.6493	3.08771	1.62654
ZC3H15	114.831	70.081	28.7508	35.5089	2.87758	1.52486
CYP1B1	114.831	72.7764	25.6704	40.9125	2.81766	1.4945
CEBPB	114.831	75.4719	14.3754	31.6493	4.13481	2.04782
FBRS	114.831	75.4719	30.291	37.8247	2.79382	1.48224
GATAD2A	114.831	76.8196	25.6704	42.4563	2.81316	1.49219
CTBP1	114.831	78.1673	31.8312	40.1405	2.68159	1.42309
YLPM1	114.831	79.515	32.3447	54.8073	2.22997	1.15703
HINT1	114.831	83.5581	35.4251	39.3686	2.65249	1.40735
ILRUN	114.831	83.5581	47.7469	42.4563	2.19936	1.13709
HDAC2	114.831	94.3398	41.0726	60.2108	2.06521	1.04629
C16orf72	114.831	101.078	37.4787	44.7721	2.62502	1.39233
PSMC4	114.831	106.469	52.3675	62.5266	1.92613	0.945703
FN1	114.831	134.771	77.0111	85.6846	1.53417	0.617457
CUTA	112.781	39.0836	18.4827	20.8422	3.86179	1.94927
KIAA1109	112.781	41.7791	20.0229	19.2983	3.9307	1.97479
NBR1	112.781	41.7791	20.5363	19.2983	3.88004	1.95607
EEF1AKNMT	112.781	41.7791	24.1301	30.1054	2.84979	1.51086
FBXO21	112.781	44.4745	21.0497	22.3861	3.62041	1.85615
RAB22A	112.781	44.4745	21.0497	23.9299	3.49615	1.80577
NUS1	112.781	45.8222	12.8352	21.6141	4.60395	2.20287
PITPNB	112.781	48.5176	18.4827	30.1054	3.31971	1.73106
HERC1	112.781	48.5176	22.0765	30.8773	3.04602	1.60693
ATP6V1E1	112.781	48.5176	25.157	28.5615	3.00266	1.58624
AACS	112.781	51.213	20.5363	25.4738	3.5643	1.83362
PPP2R5C	112.781	51.213	14.8888	31.6493	3.52387	1.81716
SIAH2	112.781	52.5608	18.9961	27.7896	3.53402	1.82131
BHLHE40	112.781	52.5608	15.9156	30.8773	3.53347	1.82109
ZDHHC20	112.781	52.5608	23.1033	32.4212	2.97781	1.57425
PYCR1	112.781	53.9085	25.157	25.4738	3.29225	1.71908
NUP98	112.781	53.9085	35.4251	30.8773	2.51408	1.33003
SIPA1L1	112.781	55.2562	19.5095	21.6141	4.08615	2.03074
GBF1	112.781	56.6039	16.9424	34.737	3.2776	1.71264
PDPR	112.781	57.9516	24.1301	31.6493	3.06085	1.61393
DOCK5	112.781	60.647	33.3715	27.7896	2.83559	1.50365
SMARCD1	112.781	61.9947	24.1301	32.4212	3.09057	1.62787
ZNF706	112.781	61.9947	23.6167	34.737	2.99511	1.58261
RAB11A	112.781	61.9947	29.7776	31.6493	2.84526	1.50856
PPFIA1	112.781	63.3424	21.5631	33.9651	3.17178	1.66529
CDH3	112.781	64.6902	16.9424	30.1054	3.77214	1.91538
MAP2K2	112.781	66.0379	25.157	37.8247	2.83922	1.50549
LEO1	112.781	67.3856	20.0229	29.3335	3.65032	1.86802
IRS1	112.781	68.7333	18.9961	31.6493	3.58403	1.84158
GOLPH3	112.781	68.7333	28.7508	37.0528	2.75842	1.46384
STAT3	112.781	68.7333	29.2642	40.9125	2.58653	1.37102
RNH1	112.781	71.4287	28.2374	32.4212	3.03683	1.60256
HIP1R	112.781	72.7764	24.1301	23.9299	3.86095	1.94895
EDC4	112.781	75.4719	29.2642	45.5441	2.51647	1.3314
CDIPT	112.781	79.515	29.2642	46.316	2.54426	1.34725
ATMIN	112.781	83.5581	28.7508	38.5967	2.91531	1.54365
NAA15	112.781	83.5581	25.6704	44.0002	2.81811	1.49473
SH3BP5	112.781	83.5581	27.2106	44.0002	2.75715	1.46318
USP14	112.781	87.6013	33.3715	37.0528	2.84536	1.50861
AFG3L2	112.781	90.2967	28.2374	47.8599	2.66866	1.41611
CRIM1	112.781	94.3398	40.5592	44.0002	2.44941	1.29244
CD81	112.781	101.078	34.3983	40.1405	2.8691	1.5206
ZNF146	112.781	106.469	30.291	40.1405	3.11295	1.63828
SLC6A14	110.73	37.7359	11.8084	20.8422	4.54713	2.18496
PNISR	110.73	37.7359	17.9693	17.7545	4.15596	2.05518
RHBDF1	110.73	37.7359	17.9693	29.3335	3.13864	1.65014
EP300	110.73	41.7791	22.5899	28.5615	2.98153	1.57605
PABPC1L	110.73	43.1268	14.8888	14.6667	5.20569	2.38009
DDB2	110.73	43.1268	15.9156	27.7896	3.52034	1.81571
SCYL2	110.73	43.1268	23.1033	31.6493	2.81004	1.49059
IFITM3	110.73	45.8222	17.4558	25.4738	3.64672	1.8666
CRIP2	110.73	45.8222	25.6704	30.8773	2.7685	1.46911
POLR2E	110.73	47.1699	20.5363	21.6141	3.74611	1.90539
SLC7A2	110.73	48.5176	14.8888	20.0703	4.55527	2.18754
PLXNB1	110.73	49.8653	18.9961	21.6141	3.95456	1.98352
TMEM259	110.73	51.213	20.0229	33.9651	2.99962	1.58478
SLC35A4	110.73	53.9085	24.1301	37.0528	2.69093	1.4281
GPBP1	110.73	55.2562	26.6972	27.7896	3.04636	1.60709
PPP1CB	110.73	56.6039	20.5363	34.737	3.0274	1.59808
DNM1L	110.73	56.6039	25.6704	37.8247	2.63539	1.39802
PLEKHB2	110.73	60.647	39.5324	46.316	1.99628	0.997314
UTRN	110.73	61.9947	23.1033	15.4387	4.48148	2.16397
NADSYN1	110.73	61.9947	22.5899	30.1054	3.27781	1.71273
C6orf89	110.73	61.9947	25.6704	37.0528	2.75377	1.46141
MRPS16	110.73	61.9947	31.8312	36.2809	2.53589	1.34249
LRPAP1	110.73	67.3856	18.9961	25.4738	4.00532	2.00192
ELOVL5	110.73	67.3856	26.6972	31.6493	3.05273	1.6101
DCTN5	110.73	67.3856	29.7776	40.1405	2.54749	1.34908
DDX18	110.73	67.3856	30.8044	44.0002	2.38108	1.25162
TRPS1	110.73	68.7333	39.5324	40.1405	2.25251	1.17153
C12orf49	110.73	75.4719	26.1838	32.4212	3.17724	1.66778
UTP4	110.73	76.8196	32.8581	37.8247	2.6534	1.40784
NOL11	110.73	76.8196	31.3178	41.6844	2.5691	1.36126
PNMA1	110.73	84.9058	27.2106	45.5441	2.68898	1.42706
GPS1	110.73	84.9058	37.4787	36.2809	2.65235	1.40727
SSB	110.73	86.2535	44.153	47.8599	2.14083	1.09817
PSMD14	110.73	92.9921	50.3139	59.4389	1.85619	0.892347
POLDIP2	110.73	95.6875	39.019	55.5792	2.18205	1.12568
ARPC3	110.73	110.512	34.3983	35.5089	3.1648	1.66212
VIRMA	108.68	36.3882	14.8888	20.0703	4.14965	2.05299
CCDC170	108.68	41.7791	18.9961	20.8422	3.77674	1.91714
FYTTD1	108.68	41.7791	27.2106	33.1931	2.49089	1.31666
SDHC	108.68	41.7791	27.2106	33.1931	2.49089	1.31666
ARHGAP21	108.68	47.1699	21.0497	23.158	3.5254	1.81779
MECP2	108.68	49.8653	31.8312	30.1054	2.55979	1.35603
SUGP2	108.68	51.213	25.157	33.9651	2.70445	1.43534
IRF2BPL	108.68	52.5608	18.4827	31.6493	3.21632	1.68541
YKT6	108.68	52.5608	30.291	36.2809	2.42205	1.27623
NDFIP1	108.68	53.9085	16.9424	21.6141	4.21687	2.07617
ANKRD28	108.68	53.9085	20.5363	27.7896	3.36441	1.75035
KCTD15	108.68	53.9085	26.6972	37.0528	2.5504	1.35073
GPR107	108.68	56.6039	20.5363	31.6493	3.16723	1.66322
HTT	108.68	60.647	28.2374	37.8247	2.56314	1.35791
PTPA	108.68	61.9947	36.4519	50.1757	1.97021	0.978349
C16orf58	108.68	63.3424	18.9961	26.2457	3.80228	1.92687
ADRM1	108.68	63.3424	34.3983	31.6493	2.60452	1.38102
KDM3B	108.68	63.3424	35.9385	32.4212	2.51643	1.33138
SPIN1	108.68	66.0379	26.1838	34.737	2.86795	1.52002
ARHGAP5	108.68	67.3856	32.8581	47.0879	2.2023	1.13901
HSD17B4	108.68	68.7333	38.5055	24.7019	2.80684	1.48895
MRPS25	108.68	68.7333	25.6704	43.2283	2.57499	1.36457
PTOV1	108.68	70.081	20.0229	31.6493	3.45952	1.79057
SNX5	108.68	71.4287	40.5592	50.1757	1.985	0.989138
NF1	108.68	72.7764	25.157	30.8773	3.23831	1.69524
NOB1	108.68	72.7764	32.8581	35.5089	2.65415	1.40825
TAX1BP1	108.68	72.7764	35.4251	35.5089	2.5581	1.35507
CARM1	108.68	74.1241	20.0229	29.3335	3.70376	1.88899
PFDN4	108.68	74.1241	26.1838	30.8773	3.20365	1.67972
TCF3	108.68	74.1241	29.2642	38.5967	2.6938	1.42964
NUP153	108.68	74.1241	36.9653	35.5089	2.52233	1.33476
RNF114	108.68	75.4719	16.429	34.737	3.5991	1.84764
PRMT5	108.68	83.5581	35.4251	44.7721	2.39706	1.26127
MSL1	108.68	83.5581	50.8273	38.5967	2.14974	1.10416
ALYREF	108.68	84.9058	54.4212	53.2634	1.79771	0.84616
ELOB	108.68	86.2535	29.2642	39.3686	2.84023	1.50601
CCAR2	108.68	86.2535	32.8581	36.2809	2.81944	1.49541
RAB14	108.68	87.6013	36.4519	30.8773	2.91524	1.54362
CHPF	108.68	90.2967	29.7776	46.316	2.61489	1.38675
VCL	108.68	90.2967	55.9614	47.8599	1.91653	0.938496
DERL1	108.68	94.3398	36.4519	41.6844	2.59827	1.37755
PSMD1	108.68	128.033	48.2603	48.6318	2.44305	1.28868
PFKP	108.68	140.162	53.9078	87.2285	1.76313	0.81814
CPLANE1	106.629	21.5634	10.2681	10.8071	6.08262	2.60469
XPC	106.629	35.0405	24.6435	24.7019	2.87098	1.52154
PPP1R3C	106.629	39.0836	13.862	12.3509	5.55882	2.47478
SBF1	106.629	39.0836	28.2374	29.3335	2.53102	1.33972
CREG1	106.629	41.7791	13.3486	26.2457	3.74822	1.90621
ADCY9	106.629	41.7791	15.9156	25.4738	3.58566	1.84224
MAN2C1	106.629	45.8222	16.429	26.2457	3.5724	1.83689
NPTN	106.629	45.8222	28.7508	29.3335	2.62466	1.39213
ERBIN	106.629	45.8222	24.1301	39.3686	2.40086	1.26355
EPHB4	106.629	49.8653	26.6972	27.7896	2.87216	1.52213
DNAJA2	106.629	49.8653	32.3447	39.3686	2.18223	1.1258
CHD8	106.629	51.213	23.1033	29.3335	3.01014	1.58983
NEDD4	106.629	52.5608	23.1033	34.737	2.75223	1.4606
PTPRU	106.629	55.2562	20.5363	20.0703	3.98668	1.99519
UHMK1	106.629	55.2562	21.5631	40.1405	2.6236	1.39155
STX16	106.629	57.9516	20.5363	26.2457	3.51804	1.81477
AFDN	106.629	57.9516	19.5095	33.1931	3.12282	1.64285
SSR3	106.629	57.9516	33.8849	21.6141	2.96547	1.56826
NRCAM	106.629	57.9516	32.8581	33.1931	2.49172	1.31714
ATP1B3	106.629	57.9516	27.724	39.3686	2.45304	1.29457
UBE2A	106.629	59.2993	27.724	38.5967	2.50191	1.32303
NUP160	106.629	60.647	34.9117	31.6493	2.51313	1.32948
SREBF1	106.629	63.3424	30.291	43.2283	2.31193	1.2091
RNF130	106.629	64.6902	19.5095	27.7896	3.62204	1.8568
LTA4H	106.629	64.6902	24.6435	30.8773	3.08567	1.62559
NOC2L	106.629	64.6902	32.8581	47.8599	2.12244	1.08573
IK	106.629	66.0379	23.6167	21.6141	3.81746	1.93261
CLPTM1	106.629	67.3856	24.1301	35.5089	2.9178	1.54488
CENPF	106.629	68.7333	36.9653	34.737	2.4457	1.29025
MAP3K11	106.629	70.081	31.8312	33.9651	2.68572	1.42531
C7orf50	106.629	71.4287	34.9117	34.737	2.55651	1.35418
DIP2B	106.629	74.1241	22.0765	30.1054	3.46391	1.7924
MLXIP	106.629	74.1241	32.3447	40.1405	2.49366	1.31826
RBM14	106.629	75.4719	50.3139	51.7195	1.78472	0.835697
ESYT2	106.629	78.1673	22.0765	30.8773	3.48977	1.80313
SEC13	106.629	79.515	40.5592	32.4212	2.55061	1.35084
MDH1	106.629	82.2104	25.6704	31.6493	3.2945	1.72006
DCTPP1	106.629	82.2104	32.3447	36.2809	2.75174	1.46034
PGP	106.629	82.2104	41.586	67.9301	1.72431	0.786018
KIF22	106.629	91.6444	34.3983	40.9125	2.63274	1.39656
AKR1B1	106.629	99.7307	53.3944	53.2634	1.93479	0.952174
GPI	106.629	138.814	60.5821	54.0353	2.14142	1.09857
SELENBP1	104.579	21.5634	16.429	13.8948	4.15983	2.05653
ZNF703	104.579	36.3882	12.3218	16.9825	4.81045	2.26617
ADGRL1	104.579	37.7359	14.3754	22.3861	3.8713	1.95282
ELK4	104.579	37.7359	17.4558	26.2457	3.25651	1.70333
RETREG2	104.579	39.0836	18.9961	22.3861	3.4716	1.7956
REV3L	104.579	39.0836	22.0765	26.2457	2.97301	1.57192
PARP14	104.579	40.4313	18.9961	19.2983	3.78672	1.92095
GAA	104.579	41.7791	22.0765	22.3861	3.29171	1.71884
CUEDC1	104.579	41.7791	23.6167	24.7019	3.02901	1.59885
MAGT1	104.579	41.7791	22.0765	29.3335	2.84687	1.50938
TBC1D5	104.579	44.4745	14.8888	23.9299	3.83972	1.941
PSMC2	104.579	44.4745	31.3178	28.5615	2.48922	1.3157
EPS8	104.579	47.1699	25.157	30.1054	2.74597	1.45731
UHRF1BP1	104.579	48.5176	17.9693	22.3861	3.79371	1.92361
ZNF740	104.579	48.5176	17.4558	27.0177	3.44241	1.78342
ACP1	104.579	48.5176	20.5363	28.5615	3.11819	1.64071
EMC1	104.579	48.5176	22.0765	29.3335	2.97795	1.57432
SLK	104.579	48.5176	24.6435	34.737	2.57822	1.36638
TUBA1A	104.579	48.5176	26.1838	46.316	2.11168	1.07839
ARIH1	104.579	55.2562	22.5899	27.0177	3.22198	1.68795
TXLNA	104.579	55.2562	24.1301	33.1931	2.78831	1.47939
CGGBP1	104.579	59.2993	18.9961	22.3861	3.96011	1.98554
SSR4	104.579	59.2993	31.3178	42.4563	2.22135	1.15143
SNX3	104.579	61.9947	29.7776	30.8773	2.74625	1.45746
PCNP	104.579	64.6902	31.3178	31.6493	2.68821	1.42665
PSMA7	104.579	64.6902	39.5324	56.3511	1.76536	0.819962
NDUFS2	104.579	66.0379	27.2106	37.0528	2.65496	1.40869
WWP1	104.579	67.3856	26.1838	25.4738	3.32893	1.73506
CNDP2	104.579	68.7333	31.3178	41.6844	2.37406	1.24736
RAP1B	104.579	68.7333	30.8044	42.4563	2.36569	1.24226
OAT	104.579	70.081	27.2106	49.4037	2.27973	1.18886
ADAM10	104.579	71.4287	23.6167	25.4738	3.58536	1.84212
SMS	104.579	72.7764	33.8849	40.9125	2.37114	1.24558
PDHA1	104.579	74.1241	31.8312	37.8247	2.56551	1.35924
MLST8	104.579	75.4719	23.1033	39.3686	2.8821	1.52712
GTPBP4	104.579	75.4719	30.291	48.6318	2.28135	1.18989
SEC62	104.579	78.1673	27.2106	44.7721	2.53875	1.34412
CYB5B	104.579	78.1673	35.9385	39.3686	2.42668	1.27898
CCNL1	104.579	79.515	43.6396	46.316	2.04649	1.03315
OSBPL8	104.579	80.8627	27.724	50.9476	2.35716	1.23705
CAPN2	104.579	83.5581	45.1798	46.316	2.05623	1.04
RNF11	104.579	91.6444	28.2374	47.0879	2.60501	1.38129
DDX46	104.579	107.817	49.8005	39.3686	2.38194	1.25214
PGM3	102.528	32.3451	15.4022	17.7545	4.06775	2.02423
TET3	102.528	37.7359	22.0765	23.158	3.10082	1.63265
TLE3	102.528	40.4313	15.9156	29.3335	3.15939	1.65965
SNHG5	102.528	40.4313	18.9961	28.5615	3.00603	1.58786
MLLT1	102.528	40.4313	24.6435	27.7896	2.72651	1.44705
MBD6	102.528	41.7791	12.3218	20.8422	4.35132	2.12145
ASCC3	102.528	41.7791	24.6435	23.158	3.01888	1.59401
TM7SF3	102.528	43.1268	12.8352	26.2457	3.72701	1.89802
JADE2	102.528	43.1268	22.5899	29.3335	2.80519	1.4881
SLC35F5	102.528	45.8222	17.4558	23.9299	3.58457	1.8418
SPTLC2	102.528	45.8222	22.5899	21.6141	3.35603	1.74676
TOM1L1	102.528	48.5176	17.9693	20.0703	3.97076	1.98941
SNHG8	102.528	48.5176	20.0229	19.2983	3.84133	1.94161
DNAJB6	102.528	49.8653	21.0497	29.3335	3.02469	1.59679
ROCK2	102.528	49.8653	25.157	33.9651	2.57761	1.36603
PPP1R9B	102.528	51.213	24.1301	26.2457	3.05188	1.6097
SGPL1	102.528	52.5608	21.5631	27.0177	3.19239	1.67464
KIAA0319L	102.528	53.9085	16.429	23.9299	3.87613	1.95462
HMGCR	102.528	55.2562	19.5095	30.1054	3.18018	1.66911
MEPCE	102.528	56.6039	30.8044	26.2457	2.78933	1.47992
FOXK2	102.528	57.9516	22.0765	18.5264	3.95242	1.98274
LTBR	102.528	57.9516	23.1033	31.6493	2.931	1.55139
RACGAP1	102.528	59.2993	29.7776	30.1054	2.70239	1.43424
LONP2	102.528	61.9947	28.2374	20.8422	3.35216	1.74509
SBDS	102.528	63.3424	24.1301	18.5264	3.88851	1.95922
FAM20B	102.528	64.6902	26.1838	35.5089	2.7105	1.43856
CPNE1	102.528	66.0379	18.4827	24.7019	3.90339	1.96473
CHD2	102.528	68.7333	11.8084	26.2457	4.50047	2.17008
AIFM1	102.528	70.081	26.6972	40.9125	2.55302	1.35221
SHISA5	102.528	71.4287	27.2106	44.7721	2.41665	1.27301
SRRM1	102.528	76.8196	28.7508	40.1405	2.60334	1.38036
FDFT1	102.528	78.1673	26.6972	36.2809	2.86918	1.52064
NRP1	102.528	78.1673	36.4519	29.3335	2.74674	1.45772
TEAD1	102.528	82.2104	43.1262	38.5967	2.26055	1.17667
JPT1	102.528	83.5581	33.3715	44.0002	2.40509	1.26609
TRAK2	102.528	86.2535	9.24133	23.9299	5.69112	2.50871
AGAP3	102.528	86.2535	21.5631	34.737	3.35313	1.74551
TCOF1	102.528	92.9921	33.8849	54.0353	2.22384	1.15305
EIF3M	102.528	94.3398	39.019	51.7195	2.16962	1.11744
CD55	100.478	32.3451	14.8888	10.8071	5.16902	2.36989
CASC3	100.478	32.3451	25.157	20.0703	2.93678	1.55424
PPM1K	100.478	33.6928	12.8352	6.9474	6.78224	2.76176
TATDN1	100.478	33.6928	15.4022	23.9299	3.41121	1.77028
EPS15	100.478	35.0405	24.1301	23.158	2.86579	1.51893
KAT6A	100.478	36.3882	16.9424	17.7545	3.94461	1.97988
VPS13D	100.478	36.3882	14.8888	20.8422	3.83045	1.93751
PIP5K1A	100.478	36.3882	19.5095	33.1931	2.59694	1.37681
TAF1C	100.478	39.0836	15.4022	30.8773	3.01561	1.59245
AKT1S1	100.478	41.7791	28.7508	33.1931	2.29654	1.19946
LRATD1	100.478	43.1268	19.5095	20.0703	3.62823	1.85926
RABGAP1	100.478	43.1268	16.9424	28.5615	3.15586	1.65803
SLC12A2	100.478	45.8222	20.5363	26.2457	3.12726	1.6449
RPL22	100.478	45.8222	25.6704	27.0177	2.77672	1.47338
OTUD4	100.478	49.8653	13.3486	20.8422	4.39717	2.13658
PAF1	100.478	49.8653	21.5631	26.2457	3.14467	1.65291
RBCK1	100.478	49.8653	20.5363	27.7896	3.11102	1.63739
PPP1R12A	100.478	49.8653	20.5363	33.1931	2.79815	1.48447
COX7A2L	100.478	51.213	25.157	31.6493	2.67032	1.41701
AMZ2	100.478	51.213	27.2106	34.737	2.44869	1.29201
IER5	100.478	52.5608	23.1033	22.3861	3.36426	1.75029
PARVA	100.478	53.9085	16.429	20.8422	4.14223	2.05041
OTUB1	100.478	53.9085	19.5095	26.2457	3.37417	1.75453
FAM168A	100.478	55.2562	21.0497	29.3335	3.09099	1.62807
LMAN2	100.478	55.2562	29.2642	37.0528	2.34832	1.23163
PRDX5	100.478	55.2562	34.3983	38.5967	2.13349	1.09321
FKBP5	100.478	55.2562	37.9921	43.2283	1.91742	0.939167
HERC2	100.478	56.6039	19.5095	30.1054	3.16601	1.66267
CTDSP1	100.478	57.9516	22.0765	36.2809	2.71481	1.44085
GTF3C4	100.478	59.2993	20.5363	26.2457	3.41535	1.77203
STK26	100.478	61.9947	20.5363	30.8773	3.1601	1.65997
CLTB	100.478	64.6902	25.6704	40.1405	2.50973	1.32753
RARG	100.478	67.3856	27.2106	40.9125	2.46412	1.30107
ATXN1L	100.478	68.7333	28.7508	33.9651	2.69805	1.43192
MAP7D1	100.478	70.081	26.1838	23.9299	3.40343	1.76699
DAP3	100.478	70.081	29.7776	28.5615	2.92357	1.54773
DGCR2	100.478	71.4287	27.2106	30.1054	2.99927	1.58461
ICMT	100.478	72.7764	35.4251	43.2283	2.20275	1.13931
FUBP3	100.478	75.4719	29.2642	40.9125	2.50723	1.3261
TUBGCP2	100.478	76.8196	26.6972	31.6493	3.0387	1.60345
PTGES2	100.478	76.8196	28.2374	35.5089	2.78129	1.47575
MGST1	100.478	79.515	43.6396	50.1757	1.91858	0.940042
HIPK2	100.478	86.2535	24.6435	39.3686	2.91712	1.54454
IDH2	100.478	90.2967	26.6972	29.3335	3.40482	1.76758
IMPAD1	100.478	94.3398	33.3715	37.0528	2.76634	1.46798
CD151	100.478	98.3829	29.7776	38.5967	2.90841	1.54023
RMND1	98.427	24.2588	9.75474	10.0351	6.19942	2.63213
ARMCX3	98.427	32.3451	9.75474	13.1229	5.71616	2.51505
CDC73	98.427	36.3882	14.3754	22.3861	3.6673	1.87472
PSPC1	98.427	41.7791	13.3486	9.2632	6.20057	2.6324
KPNA3	98.427	43.1268	25.6704	33.1931	2.40478	1.2659
CCDC85C	98.427	44.4745	18.9961	20.0703	3.65792	1.87102
ZNF512B	98.427	44.4745	24.1301	27.7896	2.75235	1.46067
MTHFD1L	98.427	45.8222	18.9961	23.9299	3.36041	1.74864
KCTD20	98.427	45.8222	26.6972	30.8773	2.50543	1.32506
SRP68	98.427	49.8653	20.5363	33.1931	2.75998	1.46466
PTPN1	98.427	51.213	22.5899	33.9651	2.64592	1.40377
NDUFS1	98.427	52.5608	29.2642	35.5089	2.33102	1.22096
SYMPK	98.427	53.9085	27.724	22.3861	3.04002	1.60408
MGA	98.427	55.2562	20.0229	20.0703	3.83315	1.93853
RAB18	98.427	55.2562	26.6972	25.4738	2.94576	1.55864
STOML2	98.427	55.2562	25.157	28.5615	2.8609	1.51647
RBM10	98.427	55.2562	23.1033	33.9651	2.69296	1.42919
USO1	98.427	56.6039	16.429	23.9299	3.8413	1.94159
PPM1H	98.427	59.2993	19.5095	30.8773	3.13031	1.6463
TSPAN3	98.427	59.2993	26.1838	30.8773	2.76416	1.46684
CHMP4B	98.427	59.2993	29.2642	33.1931	2.52534	1.33648
PAXBP1	98.427	59.2993	56.4748	44.7721	1.55784	0.639545
RAB2A	98.427	60.647	32.8581	34.737	2.35334	1.23471
DBNL	98.427	63.3424	15.9156	30.8773	3.45713	1.78958
MYBBP1A	98.427	63.3424	23.1033	40.1405	2.55787	1.35494
CNIH1	98.427	66.0379	30.8044	33.1931	2.56986	1.36169
PRDX3	98.427	67.3856	32.3447	39.3686	2.31216	1.20924
MRPL49	98.427	68.7333	20.0229	22.3861	3.94163	1.97879
ATXN7L3	98.427	70.081	29.7776	35.5089	2.58105	1.36796
PAIP2	98.427	70.081	37.9921	46.316	1.99872	0.999073
EFTUD2	98.427	71.4287	37.4787	48.6318	1.97253	0.980048
PSMC6	98.427	74.1241	29.2642	41.6844	2.43206	1.28218
FANCI	98.427	75.4719	30.8044	34.737	2.65327	1.40777
DNAJB1	98.427	80.8627	32.3447	41.6844	2.42188	1.27613
SRPK1	98.427	83.5581	19.5095	29.3335	3.72592	1.8976
MSH6	98.427	88.949	42.6128	48.6318	2.05356	1.03812
SNX17	98.427	97.0352	30.291	50.1757	2.42911	1.28043
JUND	96.3764	29.6497	16.429	23.9299	3.12263	1.64276
MED29	96.3764	32.3451	24.6435	20.0703	2.87879	1.52546
VPS13B	96.3764	33.6928	11.8084	23.9299	3.63949	1.86374
RRP1	96.3764	35.0405	20.5363	23.158	3.00764	1.58863
WDR59	96.3764	36.3882	11.8084	20.8422	4.06623	2.02369
FBRSL1	96.3764	36.3882	16.9424	30.1054	2.82191	1.49667
MPHOSPH8	96.3764	36.3882	17.9693	33.1931	2.59497	1.37572
DNAJC21	96.3764	37.7359	12.3218	13.8948	5.11555	2.35489
CGN	96.3764	40.4313	13.862	15.4387	4.6691	2.22314
OSTC	96.3764	40.4313	18.9961	20.0703	3.50193	1.80815
RFX5	96.3764	40.4313	16.9424	28.5615	3.0065	1.58809
PHC3	96.3764	43.1268	19.5095	20.8422	3.45718	1.7896
SEC14L1	96.3764	43.1268	23.1033	33.1931	2.47801	1.30918
ABL1	96.3764	44.4745	24.1301	26.2457	2.796	1.48336
ELF1	96.3764	47.1699	15.9156	19.2983	4.0764	2.0273
FBP1	96.3764	47.1699	14.3754	24.7019	3.6734	1.87711
PRR11	96.3764	48.5176	17.9693	20.8422	3.73328	1.90044
PWWP2B	96.3764	48.5176	20.0229	23.9299	3.29658	1.72097
YTHDF1	96.3764	48.5176	19.5095	27.0177	3.11418	1.63885
YTHDF2	96.3764	48.5176	20.0229	28.5615	2.98231	1.57643
TBL3	96.3764	48.5176	21.5631	28.5615	2.89067	1.53141
MATN2	96.3764	49.8653	16.9424	23.9299	3.57801	1.83916
CDC27	96.3764	51.213	23.6167	21.6141	3.26302	1.70621
ATP13A1	96.3764	51.213	28.7508	30.1054	2.50763	1.32632
SLC35F6	96.3764	52.5608	24.1301	28.5615	2.82658	1.49906
CPSF2	96.3764	52.5608	26.1838	29.3335	2.68272	1.4237
ZC3H13	96.3764	53.9085	15.9156	27.7896	3.4386	1.78182
PTPRK	96.3764	53.9085	21.5631	26.2457	3.14345	1.65235
ATP6V0E1	96.3764	55.2562	20.5363	31.6493	2.90564	1.53886
DCTN4	96.3764	56.6039	13.3486	19.2983	4.6859	2.22833
TMEM127	96.3764	56.6039	21.0497	23.158	3.46049	1.79098
SAMD4B	96.3764	56.6039	25.157	25.4738	3.02149	1.59526
OCRL	96.3764	56.6039	21.5631	29.3335	3.00571	1.58771
GOLGA2	96.3764	57.9516	22.5899	23.158	3.37344	1.75422
GTF3A	96.3764	57.9516	22.5899	33.1931	2.76657	1.4681
EXOC5	96.3764	60.647	20.0229	26.2457	3.39373	1.76287
RAB35	96.3764	60.647	29.7776	31.6493	2.55627	1.35404
OSGIN2	96.3764	63.3424	22.0765	32.4212	2.93074	1.55127
PKMYT1	96.3764	67.3856	29.2642	44.0002	2.23522	1.16042
AUP1	96.3764	67.3856	36.4519	43.2283	2.05524	1.03931
ANO6	96.3764	68.7333	25.6704	35.5089	2.69878	1.43231
RANGAP1	96.3764	68.7333	31.8312	38.5967	2.34438	1.22921
PSIP1	96.3764	71.4287	32.8581	21.6141	3.08056	1.62319
LSM4	96.3764	71.4287	33.3715	37.8247	2.35694	1.23691
SAPCD2	96.3764	72.7764	32.3447	36.2809	2.46487	1.30151
NAMPT	96.3764	74.1241	33.3715	40.9125	2.29525	1.19865
ACSL3	96.3764	74.1241	37.9921	37.8247	2.24885	1.16919
IDI1	96.3764	75.4719	30.291	31.6493	2.77442	1.47218
TNKS1BP1	96.3764	75.4719	25.6704	39.3686	2.64224	1.40176
EMD	96.3764	76.8196	16.429	31.6493	3.60237	1.84895
FDPS	96.3764	83.5581	34.3983	35.5089	2.5739	1.36396
PPP4R3A	96.3764	84.9058	33.8849	33.9651	2.67181	1.41782
CAST	96.3764	86.2535	30.8044	31.6493	2.92425	1.54806
SDC1	96.3764	102.426	37.9921	50.1757	2.25482	1.17301
ATF7IP	94.3258	29.6497	14.3754	8.49127	5.42167	2.43874
FAM102B	94.3258	32.3451	11.295	16.2106	4.60528	2.20329
NFE2L2	94.3258	33.6928	16.9424	23.158	3.19245	1.67466
NCOA6	94.3258	35.0405	16.429	17.7545	3.78447	1.92009
PLEKHF2	94.3258	36.3882	12.3218	12.3509	5.29792	2.40543
PPM1A	94.3258	37.7359	26.1838	26.2457	2.51884	1.33276
MEA1	94.3258	39.0836	24.6435	31.6493	2.36992	1.24484
SETD2	94.3258	40.4313	16.9424	13.8948	4.36995	2.12762
MEGF9	94.3258	40.4313	20.0229	30.1054	2.68825	1.42667
COPS6	94.3258	44.4745	22.5899	29.3335	2.67318	1.41855
EEA1	94.3258	45.8222	17.9693	15.4387	4.19505	2.06869
MFSD10	94.3258	45.8222	22.0765	21.6141	3.20774	1.68156
SIPA1L3	94.3258	45.8222	20.5363	26.2457	2.99577	1.58293
RNF4	94.3258	45.8222	26.1838	23.9299	2.7966	1.48367
VPS13C	94.3258	47.1699	12.8352	16.2106	4.87147	2.28436
MTREX	94.3258	47.1699	16.429	25.4738	3.37676	1.75564
ASPM	94.3258	47.1699	18.4827	30.1054	2.91215	1.54208
COMT	94.3258	48.5176	21.0497	26.2457	3.02024	1.59466
ALCAM	94.3258	49.8653	16.429	25.4738	3.44108	1.78286
CAMSAP2	94.3258	49.8653	30.291	20.0703	2.86313	1.5176
HACD2	94.3258	49.8653	23.1033	35.5089	2.46009	1.29871
GSK3B	94.3258	52.5608	18.9961	24.7019	3.36141	1.74907
PISD	94.3258	52.5608	26.6972	23.158	2.94627	1.55889
RAB15	94.3258	53.9085	14.8888	19.2983	4.33597	2.11635
CACUL1	94.3258	53.9085	19.5095	22.3861	3.53819	1.82301
TMEM43	94.3258	55.2562	26.6972	20.8422	3.14649	1.65374
AKAP13	94.3258	55.2562	25.157	37.8247	2.37501	1.24793
SNRPA	94.3258	56.6039	22.0765	27.0177	3.07429	1.62025
SPTBN2	94.3258	56.6039	27.724	37.8247	2.30256	1.20324
BUD23	94.3258	56.6039	27.2106	38.5967	2.29351	1.19756
[truncated: 8,567 more rows]

## Sheet: Low transferred Set 1
	Gene ID	Mouse_ Cocul_1 (RPM)	Mouse_Cocul_2 (RPM)	Mouse_Mix_1 (RPM)	Mouse_Mix_2 (RPM)	FC	log2FC
	HOXA11	4.10112	1.34771	22.0765	22.3861	0.122549	-3.02857
	BORCS6	0	1.34771	2.56704	4.6316	0.187218	-2.41721
	CD82	0	1.34771	2.05363	4.6316	0.201595	-2.31047
	GAREM2	0	1.34771	1.54022	4.6316	0.218365	-2.19518
	AKT3	0	1.34771	4.62067	1.54387	0.218624	-2.19348
	SLC22A4	0	1.34771	0.513407	5.40353	0.227772	-2.13434
	DDC	0	1.34771	2.05363	3.85967	0.227912	-2.13345
	CCDC82	0	1.34771	2.56704	3.08773	0.238332	-2.06896
	DCLK2	0	1.34771	3.08044	2.3158	0.24975	-2.00144
	LPAR1	0	2.69542	3.08044	6.17547	0.291211	-1.77986
	RARB	0	1.34771	4.62067	0	0.29167	-1.77759
	NXN	0	2.69542	3.08044	5.40353	0.317708	-1.65423
	HOXA13	0	2.69542	5.13407	3.08773	0.327838	-1.60894
	CDH2	0	1.34771	2.56704	1.54387	0.327838	-1.60894
	PRRX1	0	9.43398	19.5095	6.9474	0.35658	-1.4877
	CYP4F11	0	2.69542	2.05363	5.40353	0.361454	-1.46811
	ADRA1B	0	2.69542	5.13407	2.3158	0.361808	-1.4667
	PARL	2.05056	1.34771	5.13407	3.85967	0.377849	-1.40412
	TAF1A	2.05056	1.34771	2.05363	5.40353	0.455706	-1.13382
	COL4A5	2.05056	1.34771	2.56704	4.6316	0.472072	-1.08292
	ID4	0	2.69542	2.56704	3.08773	0.476664	-1.06896
	PDE4B	0	2.69542	2.56704	3.08773	0.476664	-1.06896
	ITPKA	2.05056	1.34771	1.54022	5.40353	0.4894	-1.03091
	MED11	0	4.04313	5.13407	3.08773	0.491758	-1.02398
	S100A3	0	2.69542	1.54022	3.85967	0.499163	-1.00242
	C11orf1	0	2.69542	3.08044	2.3158	0.4995	-1.00144
	ADA	4.10112	0	5.64748	2.3158	0.515004	-0.957344
	CTSV	0	1.34771	2.56704	0	0.525007	-0.929592
	BET1	2.05056	1.34771	4.10726	2.3158	0.529074	-0.918458
	KIF24	2.05056	0	3.08044	0.771933	0.532285	-0.90973
	FXYD5	2.05056	1.34771	3.08044	3.08773	0.550936	-0.860042
	NT5E	0	4.04313	2.56704	4.6316	0.561653	-0.832249
	FKBP11	4.10112	0	2.56704	4.6316	0.569708	-0.811705
	RUNX1T1	2.05056	2.69542	5.13407	3.08773	0.577244	-0.792748
	CBR3	0	2.69542	0	4.6316	0.581964	-0.780999
	CAMKK1	4.10112	5.39085	9.24133	6.9474	0.586332	-0.77021
	SIRT6	2.05056	2.69542	2.56704	5.40353	0.595439	-0.747975
	KPTN	2.05056	1.34771	4.10726	1.54387	0.601345	-0.733736
	STAT4	4.10112	0	2.05363	4.6316	0.61346	-0.704958
	AGMAT	2.05056	4.04313	3.59385	6.17547	0.623759	-0.68094
	FAHD2B	2.05056	1.34771	1.54022	3.85967	0.629323	-0.668128
	SDHAF3	0	4.04313	1.54022	4.6316	0.655096	-0.610222
	GPR137C	0	2.69542	2.56704	1.54387	0.655677	-0.608943
	SPRED1	0	5.39085	5.13407	3.08773	0.655677	-0.608943
	CEP72	4.10112	1.34771	2.05363	6.17547	0.662143	-0.594786
	CCL2	2.05056	4.04313	3.59385	5.40353	0.677274	-0.562188
	STRA6	2.05056	1.34771	2.56704	2.3158	0.695963	-0.522918
	DAPK2	2.05056	1.34771	4.10726	0.771933	0.696483	-0.52184
	CSF1	2.05056	4.04313	4.10726	4.6316	0.69731	-0.520127
	XKR8	4.10112	1.34771	3.08044	4.6316	0.706536	-0.501165
	LTB4R2	4.10112	1.34771	4.62067	3.08773	0.70687	-0.500483
	IQCK	0	4.04313	2.56704	3.08773	0.714996	-0.483994
	SEMA3A	4.10112	0	2.56704	3.08773	0.72525	-0.463449
	SP4	2.05056	1.34771	3.08044	1.54387	0.734871	-0.444436
	TM4SF4	0	4.04313	3.08044	2.3158	0.74925	-0.416481
	UBXN8	0	4.04313	3.08044	2.3158	0.74925	-0.416481
	PARVB	0	5.39085	4.10726	3.08773	0.74925	-0.416481
	FAM81A	4.10112	0	3.08044	2.3158	0.759996	-0.395936
	MTRF1	4.10112	1.34771	1.54022	5.40353	0.78471	-0.349768
	ZFHX4	0	4.04313	3.59385	1.54387	0.786952	-0.345653
	CAPN5	2.05056	2.69542	2.05363	3.85967	0.802596	-0.317255
	DPF1	2.05056	2.69542	2.05363	3.85967	0.802596	-0.317255
	MDFIC	0	2.69542	2.56704	0.771933	0.807262	-0.308891
	MMP7	0	2.69542	2.56704	0.771933	0.807262	-0.308891
	FGF2	2.05056	6.73856	6.16089	4.6316	0.814374	-0.296237
	ACBD4	2.05056	4.04313	2.05363	5.40353	0.81716	-0.291309
	KLHL15	2.05056	4.04313	3.59385	3.85967	0.81756	-0.290604
	TBC1D25	2.05056	4.04313	3.59385	3.85967	0.81756	-0.290604
	RTTN	0	6.73856	3.59385	4.6316	0.819233	-0.287655
	FBXO44	0	4.04313	4.10726	0.771933	0.828649	-0.271168
	ZNF35	4.10112	0	2.56704	2.3158	0.839906	-0.2517
	AQP3	2.05056	4.04313	4.10726	3.08773	0.846936	-0.239675
	TSPAN33	4.10112	1.34771	1.02681	5.40353	0.847362	-0.238949
	ZBTB46	4.10112	1.34771	2.56704	3.85967	0.847843	-0.238131
	KYAT3	4.10112	1.34771	4.10726	2.3158	0.848324	-0.237313
	LRRC20	0	6.73856	3.08044	4.6316	0.873771	-0.194673
	COL6A1	0	2.69542	3.08044	0	0.875011	-0.192626
	DHX35	2.05056	6.73856	4.62067	5.40353	0.87679	-0.189696
	TSPYL5	2.05056	4.04313	4.62067	2.3158	0.878502	-0.186883
	FAM126A	2.05056	2.69542	4.62067	0.771933	0.880092	-0.184273
	RIN3	4.10112	0	3.08044	1.54387	0.886862	-0.173219
	TNNT1	0	6.73856	3.59385	3.85967	0.904078	-0.145481
	PPP1R14A	2.05056	5.39085	3.59385	4.6316	0.904681	-0.144519
	HEXIM2	4.10112	4.04313	3.59385	5.40353	0.905181	-0.143722
	ENO3	4.10112	2.69542	0.513407	6.9474	0.910967	-0.13453
	C1RL	4.10112	1.34771	2.05363	3.85967	0.921455	-0.118015
	CYP4F3	4.10112	1.34771	2.05363	3.85967	0.921455	-0.118015
	JPH1	4.10112	4.04313	4.10726	4.6316	0.931959	-0.101661
	COL27A1	4.10112	4.04313	5.64748	3.08773	0.932348	-0.10106
	SELENOH	4.10112	0	0.513407	3.85967	0.937812	-0.0926287
	TFEB	2.05056	4.04313	2.56704	3.85967	0.948184	-0.0767611
	GJC1	2.05056	4.04313	4.10726	2.3158	0.948722	-0.0759427
	GRAMD1B	2.05056	6.73856	3.08044	6.17547	0.949568	-0.0746562
	FOXA2	0	5.39085	1.02681	4.6316	0.952713	-0.069886
	C1orf56	4.10112	1.34771	1.02681	4.6316	0.962961	-0.0544501
	CRLS1	4.10112	1.34771	2.56704	3.08773	0.963582	-0.0535205
	GJA1	4.10112	8.08627	8.72792	3.85967	0.968207	-0.0466125
	FAM76A	2.05056	2.69542	2.56704	2.3158	0.971973	-0.0410119
	HEATR3	4.10112	9.43398	6.16089	7.71933	0.975136	-0.0363244
	STX2	0	4.04313	2.56704	1.54387	0.983515	-0.0239809
	CAMK1	4.10112	0	2.56704	1.54387	0.997621	-0.00343625
	MST1R	0	5.39085	1.54022	3.85967	0.998326	-0.00241773
	JTB	4.10112	1.34771	1.54022	3.85967	1.00906	0.0130182
	MTFR2	4.10112	1.34771	3.08044	2.3158	1.00975	0.0139923
	SMIM26	4.10112	2.69542	3.59385	3.08773	1.01721	0.0246117
	HELQ	2.05056	1.34771	2.56704	0.771933	1.01776	0.0253989
	ABCA1	2.05056	1.34771	2.56704	0.771933	1.01776	0.0253989
	THAP3	2.05056	4.04313	2.05363	3.85967	1.03051	0.0433552
	VSIG10L	2.05056	5.39085	2.56704	4.6316	1.03372	0.047852
	SGK1	2.05056	6.73856	3.08044	5.40353	1.03597	0.050978
	IQCH	0	5.39085	0.513407	4.6316	1.04778	0.0673388
	NTAN1	4.10112	6.73856	4.10726	6.17547	1.05416	0.0760998
	TMEM160	4.10112	4.04313	3.08044	4.6316	1.05604	0.0786701
	TNK1	4.10112	2.69542	1.02681	5.40353	1.05695	0.0799051
	MIIP	4.10112	2.69542	5.64748	0.771933	1.05875	0.0823604
	INA	4.10112	12.1294	5.13407	10.0351	1.06997	0.0975644
	CEP170	2.05056	5.39085	1.54022	5.40353	1.07167	0.0998596
	ARHGAP42	2.05056	4.04313	2.56704	3.08773	1.07762	0.107849
	MED7	2.05056	4.04313	2.56704	3.08773	1.07762	0.107849
	C1orf74	4.10112	2.69542	1.54022	4.6316	1.10122	0.139105
	ICAM3	4.10112	2.69542	3.08044	3.08773	1.10187	0.139958
	CNPY4	2.05056	5.39085	3.59385	3.08773	1.11372	0.155385
	LZTS3	4.10112	1.34771	2.56704	2.3158	1.11592	0.158228
	AREG	4.10112	5.39085	3.08044	5.40353	1.11881	0.161967
	PAQR7	4.10112	5.39085	3.08044	5.40353	1.11881	0.161967
	MRPL45	4.10112	9.43398	2.05363	10.0351	1.11964	0.16304
	DNAJC27	0	4.04313	2.05363	1.54387	1.12387	0.168481
	ADGRF4	2.05056	4.04313	1.54022	3.85967	1.12849	0.174388
	MEIS2	2.05056	4.04313	1.54022	3.85967	1.12849	0.174388
	IFT43	4.10112	9.43398	4.10726	7.71933	1.14446	0.194672
	TMEM14A	2.05056	12.1294	3.08044	9.2632	1.14877	0.200086
	CRABP1	4.10112	2.69542	2.05363	3.85967	1.14937	0.200839
	KIF12	4.10112	2.69542	2.05363	3.85967	1.14937	0.200839
	LZTR1	4.10112	2.69542	2.05363	3.85967	1.14937	0.200839
	CHST7	4.10112	2.69542	3.59385	2.3158	1.15008	0.201729
	NPAT	4.10112	5.39085	2.05363	6.17547	1.15346	0.205974
	CABYR	2.05056	2.69542	2.56704	1.54387	1.15449	0.207252
	AKIP1	2.05056	5.39085	1.02681	5.40353	1.15723	0.210679
	PSENEN	2.05056	5.39085	2.56704	3.85967	1.15789	0.211497
	CPTP	4.10112	6.73856	6.16089	3.08773	1.17203	0.229012
	BEND6	2.05056	4.04313	0.513407	4.6316	1.18439	0.244145
	S1PR5	2.05056	4.04313	3.59385	1.54387	1.18607	0.24619
	PDE3A	4.10112	5.39085	4.10726	3.85967	1.19142	0.252685
	NEIL3	4.10112	2.69542	2.56704	3.08773	1.20191	0.265334
	FCHO1	2.05056	5.39085	3.08044	3.08773	1.20642	0.270732
	ZNF212	2.05056	9.43398	5.64748	3.85967	1.20799	0.272609
	PLA2G4A	0	4.04313	2.56704	0.771933	1.21089	0.276071
	SFRP1	0	4.04313	2.56704	0.771933	1.21089	0.276071
	FZD8	4.10112	4.04313	2.05363	4.6316	1.21825	0.284806
	ZNF484	4.10112	4.04313	3.59385	3.08773	1.21891	0.285593
	RELB	4.10112	6.73856	4.10726	4.6316	1.2404	0.310806
	GRIN2D	2.05056	4.04313	1.02681	3.85967	1.24705	0.318522
	DNAL1	4.10112	8.08627	5.13407	4.6316	1.24798	0.319598
	FAM114A2	4.10112	8.08627	5.13407	4.6316	1.24798	0.319598
	PTGES	4.10112	8.08627	5.13407	4.6316	1.24798	0.319598
	SKIDA1	2.05056	4.04313	2.56704	2.3158	1.24798	0.319598
	PITPNM1	0	6.73856	4.62067	0.771933	1.24959	0.321459
	LYSMD4	4.10112	2.69542	3.08044	2.3158	1.2595	0.332846
	RNPC3	4.10112	2.69542	3.08044	2.3158	1.2595	0.332846
	ZNF428	4.10112	12.1294	5.13407	7.71933	1.26274	0.336559
	UQCR11	4.10112	4.04313	2.56704	3.85967	1.26725	0.341704
	CLIP2	4.10112	4.04313	4.10726	2.3158	1.26797	0.342523
	SLC22A3	4.10112	5.39085	3.59385	3.85967	1.27349	0.348786
	ZNF300	4.10112	6.73856	4.62067	3.85967	1.27821	0.35413
	ABHD13	2.05056	10.7817	4.62067	5.40353	1.28013	0.356288
	DTNBP1	4.10112	8.08627	1.02681	8.49127	1.28045	0.356647
	CAPG	4.10112	8.08627	5.64748	3.85967	1.28192	0.358305
	SH2D5	0	6.73856	0.513407	4.6316	1.30973	0.389267
	NR0B1	0	8.08627	3.08044	3.08773	1.31097	0.39063
	MRPL39	0	5.39085	2.56704	1.54387	1.31135	0.391057
	MOK	0	5.39085	4.10726	0	1.31252	0.392336
	ANKRD44	2.05056	8.08627	3.08044	4.6316	1.31442	0.394422
	FBXO10	2.05056	5.39085	2.56704	3.08773	1.31595	0.396107
	DGKG	2.05056	4.04313	1.54022	3.08773	1.31671	0.396943
	P2RY6	2.05056	5.39085	5.64748	0	1.31765	0.397968
	SLFN11	2.05056	4.04313	3.08044	1.54387	1.31775	0.398079
	DLX1	2.05056	8.08627	3.59385	3.85967	1.36001	0.443613
	DYRK3	2.05056	6.73856	1.02681	5.40353	1.36682	0.450822
	KCNIP4	0	8.08627	2.05363	3.85967	1.36747	0.451512
	GALNT18	2.05056	6.73856	2.56704	3.85967	1.36759	0.45164
	TTC32	2.05056	5.39085	1.54022	3.85967	1.37807	0.462646
	TMLHE	2.05056	5.39085	3.08044	2.3158	1.379	0.46362
	CYP27B1	0	6.73856	1.02681	3.85967	1.37902	0.463644
	BDNF	0	5.39085	3.08044	0.771933	1.39936	0.484763
	VLDLR	2.05056	8.08627	2.56704	4.6316	1.40816	0.493811
	HECW1	2.05056	2.69542	2.56704	0.771933	1.42139	0.507305
	ROR1	2.05056	10.7817	5.13407	3.85967	1.4268	0.512782
	DNAH14	2.05056	5.39085	2.05363	3.08773	1.44736	0.533425
	GABRA5	2.05056	5.39085	3.59385	1.54387	1.44839	0.534448
	ZDHHC14	0	6.73856	3.08044	1.54387	1.4572	0.543202
	FAM216A	2.05056	13.4771	3.59385	6.9474	1.47304	0.558796
	CHD5	2.05056	4.04313	2.56704	1.54387	1.48233	0.567862
	RGS2	2.05056	4.04313	2.56704	1.54387	1.48233	0.567862
	SPATA7	2.05056	4.04313	2.56704	1.54387	1.48233	0.567862
	THBD	0	10.7817	4.10726	3.08773	1.4985	0.583519
	GLRX	0	17.5203	6.16089	5.40353	1.51501	0.599331
	YOD1	2.05056	5.39085	2.56704	2.3158	1.52399	0.607856
	RAD54B	2.05056	2.69542	3.08044	0	1.54068	0.623569
	ZNF18	0	6.73856	2.05363	2.3158	1.54221	0.624995
	LDHB	0	4.04313	2.56704	0	1.57502	0.655371
	SCARA5	2.05056	4.04313	3.08044	0.771933	1.5818	0.661569
	DOCK10	2.05056	9.43398	4.10726	3.08773	1.59619	0.674629
	ARHGEF39	0	9.43398	5.13407	0.771933	1.59735	0.675684
	ADCY7	2.05056	5.39085	1.54022	3.08773	1.60793	0.685201
	SLC47A1	2.05056	5.39085	3.08044	1.54387	1.60919	0.686337
	PIP4P2	2.05056	12.1294	4.10726	4.6316	1.62263	0.698337
	DUSP28	2.05056	6.73856	1.54022	3.85967	1.62765	0.702789
	ASNSD1	2.05056	12.1294	6.16089	2.3158	1.67282	0.742282
	CFH	2.05056	8.08627	3.59385	2.3158	1.7153	0.778462
	UGT1A9	0	2.69542	1.54022	0	1.75002	0.807374
	PRPF40B	2.05056	8.08627	1.02681	4.6316	1.79146	0.841137
	RPGR	2.05056	5.39085	2.56704	1.54387	1.81016	0.85612
	KRTCAP3	2.05056	4.04313	2.56704	0.771933	1.82502	0.867915
	SLC10A7	2.05056	4.04313	2.56704	0.771933	1.82502	0.867915
	CXCL5	0	9.43398	2.05363	3.08773	1.83492	0.875716
	CBX7	2.05056	2.69542	1.02681	1.54387	1.8462	0.884557
	PKP1	2.05056	2.69542	1.02681	1.54387	1.8462	0.884557
	ZDBF2	2.05056	2.69542	1.02681	1.54387	1.8462	0.884557
	FGF12	2.05056	6.73856	1.54022	3.08773	1.89914	0.925344
	GLDC	0	16.1725	4.62067	3.85967	1.90706	0.931354
	FAM43A	0	5.39085	2.05363	0.771933	1.90788	0.931974
	INSL4	2.05056	5.39085	3.08044	0.771933	1.93164	0.949827
	LRTOMT	2.05056	4.04313	3.08044	0	1.97819	0.98418
	DNAH1	2.05056	6.73856	0.513407	3.85967	2.00983	1.00707
	ATOH8	2.05056	6.73856	2.05363	2.3158	2.0115	1.00827
	PNMA2	2.05056	6.73856	2.05363	2.3158	2.0115	1.00827
	LPCAT2	2.05056	6.73856	3.59385	0.771933	2.01318	1.00948
	SASS6	2.05056	5.39085	2.05363	1.54387	2.0685	1.04858
	ARHGAP23	2.05056	5.39085	3.59385	0	2.07059	1.05005
	SYNRG	2.05056	8.08627	2.56704	2.3158	2.07601	1.05382
	SMIM8	0	8.08627	1.54022	2.3158	2.09705	1.06836
	PFKFB4	0	5.39085	2.56704	0	2.10003	1.07041
	OVOL1	2.05056	9.43398	3.08044	2.3158	2.12825	1.08967
	LRRK2	2.05056	6.73856	2.56704	1.54387	2.138	1.09626
	MCPH1	0	6.73856	1.54022	1.54387	2.18494	1.1276
	NLRP2	0	6.73856	1.54022	1.54387	2.18494	1.1276
	CGNL1	2.05056	1.34771	0	1.54387	2.20114	1.13825
	AMZ1	2.05056	5.39085	2.56704	0.771933	2.22865	1.15617
	CYB561D2	2.05056	5.39085	2.56704	0.771933	2.22865	1.15617
	S100A13	2.05056	10.7817	2.56704	3.08773	2.26928	1.18223
	ZFYVE28	2.05056	6.73856	3.08044	0.771933	2.28148	1.18997
	GLYCTK	2.05056	2.69542	0.513407	1.54387	2.30693	1.20597
	C2orf72	2.05056	8.08627	2.05363	2.3158	2.31994	1.21409
	CISD3	2.05056	8.08627	2.05363	2.3158	2.31994	1.21409
	SLC35E4	2.05056	8.08627	2.05363	2.3158	2.31994	1.21409
	LRRC73	2.05056	6.73856	0.513407	3.08773	2.44065	1.28726
	ASB3	2.05056	6.73856	3.59385	0	2.4456	1.29019
	HFE	0	10.7817	2.05363	2.3158	2.46753	1.30307
	ZNF2	0	6.73856	1.02681	1.54387	2.62131	1.39029
	MATN3	0	8.08627	1.54022	1.54387	2.62193	1.39063
	USP9Y	0	9.43398	2.05363	1.54387	2.62237	1.39087
	CNTLN	0	6.73856	2.56704	0	2.62503	1.39234
	TUSC1	2.05056	6.73856	1.02681	2.3158	2.62941	1.39474
	ZNF488	2.05056	6.73856	1.02681	2.3158	2.62941	1.39474
	C1R	2.05056	8.08627	3.08044	0.771933	2.63132	1.39579
	FAM13A	0	10.7817	1.54022	2.3158	2.79607	1.4834
	RBM20	0	10.7817	1.54022	2.3158	2.79607	1.4834
	MSRA	2.05056	5.39085	1.02681	1.54387	2.89472	1.53342
	PLA2R1	2.05056	8.08627	1.02681	2.3158	3.03261	1.60056
	ALPK2	2.05056	8.08627	2.56704	0.771933	3.03592	1.60213
	CDK5R1	2.05056	6.73856	2.05363	0.771933	3.11057	1.63718
	PCCA	2.05056	13.4771	1.02681	3.85967	3.17768	1.66797
	TMEM234	0	6.73856	0.513407	1.54387	3.27548	1.71171
	RAD51B	2.05056	6.73856	1.02681	1.54387	3.41898	1.77357
	QPCT	0	8.08627	1.54022	0.771933	3.49729	1.80624
	TXNDC5	2.05056	6.73856	0	2.3158	3.79528	1.92421
	ANPEP	2.05056	6.73856	1.54022	0.771933	3.80127	1.92648
	MEIS3	2.05056	6.73856	1.54022	0.771933	3.80127	1.92648
	ERICH1	2.05056	10.7817	2.56704	0.771933	3.84318	1.9423
	KLHL11	2.05056	12.1294	0.513407	3.08773	3.93763	1.97733
	PCSK1N	2.05056	12.1294	2.05363	1.54387	3.94162	1.97879
	DNAJB4	2.05056	4.04313	1.54022	0	3.95638	1.98418
	HOXB9	0	10.7817	1.02681	1.54387	4.1941	2.06836
	AGR3	2.05056	6.73856	0.513407	1.54387	4.27222	2.09498
	ONECUT1	2.05056	1.34771	0	0.771933	4.40229	2.13825
	CNEP1R1	2.05056	12.1294	1.54022	1.54387	4.59778	2.20094
	FAM89A	2.05056	6.73856	1.02681	0.771933	4.88624	2.28873
	PLD1	2.05056	6.73856	1.02681	0.771933	4.88624	2.28873
	TIGAR	2.05056	6.73856	1.02681	0.771933	4.88624	2.28873
	NDRG2	0	6.73856	0.513407	0.771933	5.24262	2.39029
	ZBED6CL	0	6.73856	0.513407	0.771933	5.24262	2.39029
	GNPDA2	0	10.7817	2.05363	0	5.25007	2.39234
	STARD9	2.05056	6.73856	0	1.54387	5.69293	2.50917
	ORAI3	2.05056	5.39085	0.513407	0.771933	5.78944	2.53342
	GSDMD	0	8.08627	0.513407	0.771933	6.29115	2.65332
	TUBB4A	0	8.08627	0.513407	0.771933	6.29115	2.65332
	ANKRD2	0	6.73856	1.02681	0	6.56259	2.71426
	PHLDB3	2.05056	10.7817	1.02681	0.771933	7.13399	2.83471
	B9D2	2.05056	10.7817	1.02681	0	12.4971	3.64353
	LRRC46	0	6.73856	0.513407	0	13.1252	3.71426
	ZDHHC11	0	6.73856	0.513407	0	13.1252	3.71426
	ADPRH	2.05056	8.08627	0	0.771933	13.1317	3.71499
	C1QL1	0	0	1.54022	4.6316	0	-
	COL4A4	0	0	2.56704	1.54387	0	-
	HDHD2	0	0	2.56704	0.771933	0	-
	KIAA0319	2.05056	1.34771	0	0	-	-
	MTFP1	0	0	1.02681	3.85967	0	-
	NR5A2	0	0	2.56704	0	0	-
	RBPMS2	0	0	2.56704	1.54387	0	-
	SH2B2	0	8.08627	0	0	-	-
	ZNF418	2.05056	8.08627	0	0	-	-

## Sheet: Low transferred Set 2
	Gene ID	Mouse_ Cocul_1 (RPM)	Mouse_Cocul_2 (RPM)	Mouse_Mix_1 (RPM)	Mouse_Mix_2 (RPM)	FC	log2FC
	TRIM35	6.15168	4.04313	6.67429	7.71933	0.708287	-0.497594
	NRGN	6.15168	1.34771	4.62067	5.40353	0.748129	-0.418641
	RAD52	6.15168	0	6.67429	1.54387	0.748548	-0.417834
	SYTL5	6.15168	1.34771	3.59385	6.17547	0.767648	-0.381483
	KRT86	6.15168	0	3.08044	3.85967	0.886396	-0.173977
	HPF1	6.15168	5.39085	5.13407	6.9474	0.955391	-0.0658367
	SLF1	6.15168	2.69542	4.62067	4.6316	0.95621	-0.0646007
	TCP11L1	6.15168	2.69542	4.62067	4.6316	0.95621	-0.0646007
	RRAGB	6.15168	2.69542	2.05363	6.9474	0.9829	-0.024884
	SLC16A6	6.15168	2.69542	3.59385	5.40353	0.983298	-0.0242997
	MAPK7	6.15168	5.39085	6.16089	5.40353	0.998107	-0.00273331
	NAPRT	6.15168	1.34771	3.59385	3.85967	1.00616	0.00885306
	ING2	6.15168	2.69542	2.56704	6.17547	1.01197	0.0171596
	GNG11	6.15168	4.04313	6.16089	3.85967	1.01739	0.024874
	RPL17	6.15168	4.04313	3.59385	6.17547	1.04355	0.0615066
	TIPIN	6.15168	5.39085	4.10726	6.9474	1.04413	0.0623053
	ZNF567	6.15168	4.04313	4.10726	5.40353	1.07192	0.100199
	B3GALT5-AS1	6.15168	1.34771	3.08044	3.85967	1.08059	0.111816
	ARL4A	6.15168	8.08627	4.62067	8.49127	1.08588	0.118862
	PGBD1	6.15168	0	1.02681	4.6316	1.08717	0.120584
	SLC16A5	6.15168	2.69542	4.10726	3.85967	1.11048	0.151183
	EXOG	6.15168	5.39085	7.1877	3.08773	1.12331	0.16776
	DSCC1	6.15168	9.43398	3.59385	10.0351	1.14357	0.193542
	FBLN1	6.15168	4.04313	5.64748	3.08773	1.16709	0.222921
	PTPRM	6.15168	13.4771	5.13407	11.579	1.17446	0.231995
	RBM24	6.15168	5.39085	5.13407	4.6316	1.18195	0.241168
	OCEL1	6.15168	2.69542	2.05363	5.40353	1.18639	0.246579
	SYNPO	6.15168	6.73856	4.62067	6.17547	1.19397	0.255765
	OGFRP1	6.15168	0	2.05363	3.08773	1.19651	0.258831
	MUC5AC	6.15168	4.04313	3.08044	5.40353	1.20166	0.265024
	KCNF1	6.15168	1.34771	1.54022	4.6316	1.2151	0.281078
	MTND2P28	6.15168	1.34771	3.08044	3.08773	1.21582	0.28193
	GEMIN7	6.15168	14.8248	4.10726	13.1229	1.21743	0.283842
	TPGS1	6.15168	2.69542	2.56704	4.6316	1.229	0.297482
	C10orf88	6.15168	0	2.56704	2.3158	1.25986	0.333262
	LYN	6.15168	1.34771	5.13407	0.771933	1.26979	0.344592
	GLI2	6.15168	4.04313	4.10726	3.85967	1.27964	0.355741
	TMEM70	6.15168	5.39085	2.05363	6.9474	1.28236	0.358798
	CRAT	6.15168	6.73856	3.08044	6.9474	1.28545	0.362268
	BBIP1	6.15168	9.43398	5.13407	6.9474	1.29005	0.367424
	TRIM68	4.10112	4.04313	3.08044	3.08773	1.32037	0.400939
	C2orf42	6.15168	4.04313	1.54022	6.17547	1.32131	0.401969
	MMP17	6.15168	4.04313	3.08044	4.6316	1.32193	0.402651
	WDR72	6.15168	2.69542	2.05363	4.6316	1.32338	0.404229
	ALKBH3	6.15168	2.69542	3.59385	3.08773	1.3241	0.405016
	NLRX1	6.15168	2.69542	3.59385	3.08773	1.3241	0.405016
	APTR	6.15168	1.34771	1.02681	4.6316	1.32535	0.406377
	NUP62CL	4.10112	1.34771	2.56704	1.54387	1.32546	0.406492
	TRIM59	4.10112	1.34771	2.56704	1.54387	1.32546	0.406492
	UBOX5	6.15168	1.34771	2.56704	3.08773	1.32621	0.407306
	BICC1	4.10112	13.4771	6.16089	6.9474	1.341	0.423311
	RAB11FIP5	6.15168	9.43398	6.16089	5.40353	1.34773	0.430527
	RRAGC	6.15168	5.39085	3.08044	5.40353	1.36051	0.444147
	GNAI1	6.15168	5.39085	4.62067	3.85967	1.36109	0.444767
	CIDECP1	6.15168	2.69542	2.56704	3.85967	1.37662	0.461127
	PECR	6.15168	2.69542	2.56704	3.85967	1.37662	0.461127
	CADM1	4.10112	4.04313	2.05363	3.85967	1.37728	0.461821
	TMEM156	6.15168	2.69542	4.10726	2.3158	1.3774	0.461946
	MYCBP	6.15168	9.43398	6.67429	4.6316	1.37854	0.463145
	CEP295	6.15168	8.08627	4.10726	6.17547	1.38465	0.469519
	ZNF117	6.15168	1.34771	1.54022	3.85967	1.38881	0.473845
	ZNF548	6.15168	1.34771	3.08044	2.3158	1.38974	0.474819
	NOXA1	4.10112	2.69542	1.02681	3.85967	1.39089	0.476006
	ZNF70	4.10112	2.69542	1.02681	3.85967	1.39089	0.476006
	CEP152	4.10112	2.69542	2.56704	2.3158	1.39193	0.477082
	HDAC5	4.10112	2.69542	2.56704	2.3158	1.39193	0.477082
	KANK1	4.10112	6.73856	3.08044	4.6316	1.40555	0.491137
	DENND2B	6.15168	4.04313	2.56704	4.6316	1.41622	0.502041
	NANP	6.15168	8.08627	3.08044	6.9474	1.41984	0.505731
	TRMT6	6.15168	12.1294	5.13407	7.71933	1.42228	0.508201
	NFKBIZ	4.10112	8.08627	3.08044	5.40353	1.43652	0.522577
	RBM48	4.10112	8.08627	4.62067	3.85967	1.43714	0.523197
	F2R	4.10112	8.08627	6.16089	2.3158	1.43775	0.523817
	GYG2	4.10112	4.04313	4.10726	1.54387	1.44117	0.527245
	PPARG	6.15168	9.43398	3.08044	7.71933	1.44315	0.529218
	C15orf40	6.15168	5.39085	5.64748	2.3158	1.44947	0.535525
	DYNC2LI1	4.10112	6.73856	5.13407	2.3158	1.45502	0.541035
	RUNDC3A-AS1	6.15168	1.34771	0.513407	4.6316	1.45761	0.543601
	SLC27A3	6.15168	1.34771	0.513407	4.6316	1.45761	0.543601
	ADAMTS9	6.15168	1.34771	2.05363	3.08773	1.45864	0.544624
	CCDC40	4.10112	2.69542	0	4.6316	1.46743	0.553291
	WARS2-AS1	6.15168	4.04313	4.62067	2.3158	1.46974	0.555564
	CPLANE2	6.15168	2.69542	2.05363	3.85967	1.49614	0.581244
	RAB3IL1	6.15168	2.69542	2.05363	3.85967	1.49614	0.581244
	SPESP1	6.15168	2.69542	2.05363	3.85967	1.49614	0.581244
	SPRY2	6.15168	0	2.56704	1.54387	1.49643	0.581526
	ZNF227	6.15168	5.39085	3.08044	4.6316	1.49669	0.581775
	COL1A1	6.15168	2.69542	3.59385	2.3158	1.49706	0.582133
	MOB2	6.15168	5.39085	4.62067	3.08773	1.4974	0.582457
	DFFB	4.10112	4.04313	1.54022	3.85967	1.50823	0.592854
	IQCC	4.10112	4.04313	1.54022	3.85967	1.50823	0.592854
	NKAIN1	4.10112	4.04313	3.08044	2.3158	1.50925	0.593828
	IGFBP6	6.15168	9.43398	2.56704	7.71933	1.51518	0.599486
	RP2	6.15168	6.73856	3.08044	5.40353	1.51936	0.603467
	TESC	6.15168	6.73856	4.62067	3.85967	1.52002	0.604087
	FYB1	4.10112	10.7817	5.13407	4.6316	1.52399	0.607856
	MRPL54	6.15168	10.7817	5.64748	5.40353	1.53229	0.615691
	EEF1A1P5	6.15168	1.34771	1.02681	3.85967	1.53472	0.617979
	ARHGEF40	4.10112	5.39085	3.08044	3.08773	1.53886	0.621863
	DRAM2	6.15168	12.1294	8.72792	3.08773	1.54719	0.629652
	TCIM	6.15168	5.39085	5.13407	2.3158	1.54936	0.631672
	SMPD3	4.10112	2.69542	0.513407	3.85967	1.55418	0.636154
	ZNF446	4.10112	6.73856	3.08044	3.85967	1.56189	0.643292
	NTS	4.10112	6.73856	4.62067	2.3158	1.56271	0.64405
	VCAN	6.15168	2.69542	2.56704	3.08773	1.56454	0.645738
	LMLN	6.15168	2.69542	4.10726	1.54387	1.56555	0.646668
	SLC16A4	6.15168	2.69542	4.10726	1.54387	1.56555	0.646668
	TWF2	6.15168	2.69542	4.10726	1.54387	1.56555	0.646668
	HNF4A	6.15168	6.73856	3.59385	4.6316	1.56712	0.648113
	CAVIN2	4.10112	8.08627	3.08044	4.6316	1.58031	0.660204
	FRG1	4.10112	8.08627	3.08044	4.6316	1.58031	0.660204
	ZIC5	4.10112	8.08627	3.08044	4.6316	1.58031	0.660204
	MED10	6.15168	12.1294	4.62067	6.9474	1.58031	0.660204
	PDIA5	6.15168	8.08627	3.59385	5.40353	1.58245	0.662164
	SRCAP	4.10112	4.04313	2.05363	3.08773	1.58407	0.663633
	ZFP41	4.10112	4.04313	2.05363	3.08773	1.58407	0.663633
	KREMEN2	6.15168	4.04313	2.56704	3.85967	1.58632	0.665686
	COMMD1	6.15168	6.73856	2.56704	5.40353	1.61723	0.693525
	DPCD	4.10112	12.1294	3.08044	6.9474	1.61855	0.694699
	SNAPC1	6.15168	1.34771	0	4.6316	1.61918	0.695264
	REEP6	4.10112	6.73856	2.05363	4.6316	1.62144	0.697273
	CRLF3	6.15168	1.34771	3.08044	1.54387	1.62173	0.697536
	TMEM98	6.15168	1.34771	3.08044	1.54387	1.62173	0.697536
	C5	6.15168	8.08627	2.56704	6.17547	1.62859	0.703624
	KIF18B	6.15168	22.9111	7.70111	10.0351	1.63861	0.712472
	ZC3H12C	4.10112	9.43398	3.59385	4.6316	1.64552	0.718539
	CLCF1	6.15168	4.04313	3.08044	3.08773	1.65281	0.72492
	ZNF532	6.15168	13.4771	4.10726	7.71933	1.65972	0.730938
	ZNF764	6.15168	5.39085	1.54022	5.40353	1.66229	0.733172
	JCAD	6.15168	5.39085	3.08044	3.85967	1.66316	0.733929
	PIF1	6.15168	5.39085	3.08044	3.85967	1.66316	0.733929
	NHS	6.15168	5.39085	4.62067	2.3158	1.66404	0.734687
	SRP19	4.10112	4.04313	4.10726	0.771933	1.66918	0.739141
	S100P	6.15168	6.73856	3.08044	4.6316	1.67144	0.741094
	CDK5	6.15168	6.73856	4.62067	3.08773	1.67223	0.741776
	ZNF280D	6.15168	6.73856	6.16089	1.54387	1.67302	0.742459
	TESMIN	4.10112	5.39085	2.56704	3.08773	1.67858	0.747239
	PCDH17	6.15168	8.08627	4.62067	3.85967	1.67894	0.747549
	ZNF449	4.10112	5.39085	4.10726	1.54387	1.67966	0.748169
	GEMIN2	4.10112	6.73856	1.02681	5.40353	1.68571	0.753354
	TNFRSF10A	6.15168	10.7817	4.62067	5.40353	1.68925	0.756383
	AMH	4.10112	8.08627	2.56704	4.6316	1.69301	0.759594
	CEACAM6	6.15168	2.69542	2.05363	3.08773	1.72077	0.783055
	TRIM9	6.15168	2.69542	3.59385	1.54387	1.72199	0.784078
	PARP16	6.15168	4.04313	3.59385	2.3158	1.72511	0.786691
	EPHA10	6.15168	9.43398	5.13407	3.85967	1.73295	0.793227
	USP49	6.15168	9.43398	5.13407	3.85967	1.73295	0.793227
	WHAMM	6.15168	16.1725	5.13407	7.71933	1.73683	0.796459
	PEX14	4.10112	6.73856	1.54022	4.6316	1.75632	0.812554
	ARNTL	4.10112	5.39085	1.54022	3.85967	1.75781	0.813778
	HOMER3	4.10112	5.39085	1.54022	3.85967	1.75781	0.813778
	KCTD17	4.10112	5.39085	4.62067	0.771933	1.76018	0.815727
	ZNF189	4.10112	5.39085	4.62067	0.771933	1.76018	0.815727
	CYB5D1	4.10112	2.69542	0	3.85967	1.76092	0.816326
	PRAME	4.10112	4.04313	3.08044	1.54387	1.76118	0.816545
	ZNF570	4.10112	4.04313	3.08044	1.54387	1.76118	0.816545
	MPHOSPH6	6.15168	10.7817	2.56704	6.9474	1.77976	0.83168
	MYLK	6.15168	8.08627	4.10726	3.85967	1.78713	0.837647
	AMIGO1	6.15168	6.73856	2.56704	4.6316	1.79065	0.840484
	TUB	6.15168	5.39085	2.56704	3.85967	1.79603	0.844809
	ACYP1	6.15168	5.39085	4.10726	2.3158	1.79705	0.845627
	FSTL1	6.15168	4.04313	1.02681	4.6316	1.80171	0.849366
	CBWD1	6.15168	4.04313	2.56704	3.08773	1.80287	0.850296
	ETV5	6.15168	2.69542	1.02681	3.85967	1.81053	0.85641
	LRRC75B	6.15168	2.69542	1.02681	3.85967	1.81053	0.85641
	STOX1	6.15168	2.69542	1.02681	3.85967	1.81053	0.85641
	NPR3	4.10112	8.08627	2.05363	4.6316	1.82303	0.866341
	SPC24	6.15168	12.1294	4.62067	5.40353	1.8237	0.866865
	EIF5A2	4.10112	8.08627	3.59385	3.08773	1.82403	0.867127
	GGT6	6.15168	1.34771	2.56704	1.54387	1.82427	0.867319
	SERGEF	6.15168	1.34771	2.56704	1.54387	1.82427	0.867319
	CYSTM1	6.15168	12.1294	7.70111	2.3158	1.82502	0.867915
	SMARCE1	4.10112	5.39085	0.513407	4.6316	1.84489	0.883534
	ST6GALNAC2	6.15168	5.39085	1.54022	4.6316	1.8702	0.903191
	CCDC112	6.15168	5.39085	3.08044	3.08773	1.8713	0.904044
	HPGD	6.15168	17.5203	7.1877	5.40353	1.88003	0.910758
	SP6	4.10112	9.43398	4.10726	3.08773	1.88118	0.911641
	GPRASP2	6.15168	4.04313	1.54022	3.85967	1.88797	0.916835
	KSR1	6.15168	4.04313	1.54022	3.85967	1.88797	0.916835
	CEP41	4.10112	2.69542	2.05363	1.54387	1.88924	0.917809
	FSD1L	6.15168	4.04313	3.08044	2.3158	1.88924	0.917809
	USE1	6.15168	4.04313	3.08044	2.3158	1.88924	0.917809
	CLIP4	6.15168	9.43398	2.05363	6.17547	1.89397	0.921414
	GPR180	6.15168	9.43398	3.59385	4.6316	1.89481	0.922053
	NRARP	4.10112	8.08627	2.56704	3.85967	1.89637	0.923239
	SH3PXD2B	6.15168	14.8248	7.1877	3.85967	1.89878	0.925072
	ABCC4	4.10112	28.3019	9.24133	7.71933	1.91048	0.933938
	LIX1L	4.10112	6.73856	2.56704	3.08773	1.91691	0.938782
	SDCCAG8	4.10112	6.73856	5.64748	0	1.91938	0.940643
	GADD45G	4.10112	5.39085	1.02681	3.85967	1.9425	0.957912
	HIC2	4.10112	5.39085	2.56704	2.3158	1.94395	0.958988
	HTR1D	4.10112	5.39085	2.56704	2.3158	1.94395	0.958988
	XYLB	4.10112	5.39085	2.56704	2.3158	1.94395	0.958988
	NRG1	4.10112	13.4771	5.13407	3.85967	1.9545	0.966798
	SNX7	4.10112	8.08627	1.54022	4.6316	1.97468	0.981621
	ARHGAP44	4.10112	4.04313	2.56704	1.54387	1.98114	0.986328
	DGAT2	4.10112	4.04313	2.56704	1.54387	1.98114	0.986328
	ZCCHC4	4.10112	0	0.513407	1.54387	1.99347	0.995285
	KRBOX4	4.10112	6.73856	1.54022	3.85967	2.00739	1.00532
	MGAT5B	4.10112	6.73856	1.54022	3.85967	2.00739	1.00532
	CD58	4.10112	6.73856	3.08044	2.3158	2.00875	1.00629
	TRIM36	4.10112	6.73856	3.08044	2.3158	2.00875	1.00629
	DZIP1	4.10112	2.69542	1.02681	2.3158	2.0333	1.02382
	RAD50	4.10112	2.69542	2.56704	0.771933	2.03552	1.0254
	TTLL3	4.10112	2.69542	2.56704	0.771933	2.03552	1.0254
	ZSCAN21	4.10112	8.08627	2.05363	3.85967	2.06102	1.04336
	RAB2B	4.10112	10.7817	5.64748	1.54387	2.06955	1.04931
	HSPA13	4.10112	17.5203	5.64748	4.6316	2.10343	1.07275
	GPR161	4.10112	9.43398	1.02681	5.40353	2.10488	1.07374
	PCDHA12	4.10112	6.73856	2.05363	3.08773	2.10833	1.0761
	LIN52	4.10112	6.73856	3.59385	1.54387	2.10982	1.07712
	BORA	4.10112	4.04313	3.08044	0.771933	2.11409	1.08003
	KHDRBS3	4.10112	1.34771	1.02681	1.54387	2.11961	1.0838
	TTC28	4.10112	1.34771	2.56704	0	2.12262	1.08584
	DNAJC25	4.10112	10.7817	1.54022	5.40353	2.14334	1.09986
	LSM11	4.10112	10.7817	3.08044	3.85967	2.14446	1.10062
	BTN2A1	4.10112	14.8248	2.56704	6.17547	2.16482	1.11425
	C1GALT1	4.10112	9.43398	3.08044	3.08773	2.19434	1.13379
	PKIG	4.10112	9.43398	3.08044	3.08773	2.19434	1.13379
	EIF4E3	4.10112	4.04313	0.513407	3.08773	2.26158	1.17733
	GTF2B	4.10112	5.39085	2.56704	1.54387	2.30897	1.20725
	POLR2L	4.10112	5.39085	2.56704	1.54387	2.30897	1.20725
	SOCS3	4.10112	5.39085	2.56704	1.54387	2.30897	1.20725
	POGLUT1	4.10112	17.5203	4.62067	4.6316	2.33687	1.22458
	LYPLAL1	4.10112	6.73856	3.08044	1.54387	2.34406	1.22901
	ALDH2	4.10112	14.8248	4.10726	3.85967	2.37557	1.24827
	INTU	4.10112	2.69542	2.05363	0.771933	2.40538	1.26626
	IGSF8	4.10112	10.7817	1.54022	4.6316	2.41141	1.26988
	GIN1	4.10112	12.1294	3.59385	3.08773	2.42914	1.28045
	CALHM2	4.10112	4.04313	1.02681	2.3158	2.43649	1.28481
	TMEM86A	4.10112	4.04313	1.02681	2.3158	2.43649	1.28481
	LRP4	4.10112	4.04313	2.56704	0.771933	2.43915	1.28638
	MITF	4.10112	4.04313	2.56704	0.771933	2.43915	1.28638
	PRPH	4.10112	4.04313	2.56704	0.771933	2.43915	1.28638
	MAPRE3	4.10112	13.4771	4.10726	3.08773	2.44312	1.28873
	MED30	4.10112	8.08627	1.02681	3.85967	2.4941	1.31852
	CLN5	4.10112	8.08627	2.56704	2.3158	2.49597	1.3196
	F12	4.10112	9.43398	3.08044	2.3158	2.50825	1.32668
	STX1A	4.10112	20.2157	7.1877	2.3158	2.55872	1.35542
	EGFL7	4.10112	10.7817	1.02681	4.6316	2.63021	1.39518
	P3H2	4.10112	12.1294	3.08044	3.08773	2.63133	1.39579
	MCM8	4.10112	6.73856	2.56704	1.54387	2.63681	1.3988
	ZNF628	4.10112	4.04313	1.54022	1.54387	2.64073	1.40094
	IGFBP1	4.10112	2.69542	1.02681	1.54387	2.64387	1.40265
	PANX2	4.10112	1.34771	2.05363	0	2.65327	1.40777
	KIF5C	4.10112	9.43398	1.02681	3.85967	2.76991	1.46984
	PDK4	4.10112	8.08627	2.05363	2.3158	2.78924	1.47987
	SYDE1	4.10112	8.08627	2.05363	2.3158	2.78924	1.47987
	ZSCAN26	4.10112	6.73856	1.54022	2.3158	2.8111	1.49114
	FUT11	4.10112	6.73856	3.08044	0.771933	2.81376	1.4925
	CTNS	4.10112	5.39085	2.56704	0.771933	2.84278	1.5073
	PRIMPOL	4.10112	5.39085	2.56704	0.771933	2.84278	1.5073
	ZNF184	4.10112	4.04313	0.513407	2.3158	2.87864	1.52539
	MCC	4.10112	2.69542	1.54022	0.771933	2.93949	1.55556
	CEP85L	4.10112	6.73856	0.513407	3.08773	3.01007	1.5898
	OLFML2A	4.10112	6.73856	0.513407	3.08773	3.01007	1.5898
	SLC25A32	4.10112	6.73856	1.02681	2.3158	3.24288	1.69727
	PLIN2	4.10112	12.1294	1.02681	3.85967	3.32152	1.73184
	EEF1E1	4.10112	6.73856	1.54022	1.54387	3.51471	1.81341
	GLMN	4.10112	6.73856	1.54022	1.54387	3.51471	1.81341
	UNC5B	4.10112	6.73856	1.54022	1.54387	3.51471	1.81341
	MKRN3	4.10112	8.08627	1.02681	2.3158	3.64607	1.86634
	PPP3CC	4.10112	8.08627	1.02681	2.3158	3.64607	1.86634
	GKAP1	4.10112	9.43398	2.05363	1.54387	3.76237	1.91164
	MAGEH1	4.10112	9.43398	2.05363	1.54387	3.76237	1.91164
	IL20	4.10112	6.73856	0.513407	2.3158	3.83135	1.93785
	RTN4R	4.10112	6.73856	0.513407	2.3158	3.83135	1.93785
	IRAK1BP1	4.10112	6.73856	2.05363	0.771933	3.83629	1.93971
	NDUFAF1	4.10112	10.7817	0	3.85967	3.85598	1.9471
	TMEM63C	4.10112	10.7817	1.54022	2.3158	3.85963	1.94846
	SCN9A	4.10112	9.43398	1.54022	1.54387	4.38869	2.13379
	ZSWIM7	4.10112	13.4771	1.54022	2.3158	4.55865	2.18861
	FICD	4.10112	6.73856	0	2.3158	4.68075	2.22674
	GPR68	4.10112	6.73856	1.54022	0.771933	4.68813	2.22901
	PARD3B	4.10112	8.08627	2.56704	0	4.74765	2.24721
	AP4S1	4.10112	9.43398	2.05363	0.771933	4.79023	2.2601
	ALG14	4.10112	13.4771	2.05363	1.54387	4.88624	2.28873
	CXADR	4.10112	8.08627	1.54022	0.771933	5.27101	2.39808
	TATDN3	4.10112	8.08627	1.54022	0.771933	5.27101	2.39808
	TRMT10A	4.10112	4.04313	0	1.54387	5.27523	2.39924
	ETS1	4.10112	10.7817	1.02681	1.54387	5.78944	2.53342
	METTL4	4.10112	8.08627	0.513407	1.54387	5.92405	2.56658
	TM9SF1	4.10112	8.08627	0.513407	1.54387	5.92405	2.56658
	NRG2	4.10112	6.73856	1.02681	0.771933	6.02624	2.59126
	PCDHA11	4.10112	6.73856	1.02681	0.771933	6.02624	2.59126
	SERPINB9	4.10112	6.73856	1.02681	0.771933	6.02624	2.59126
	CCDC150	4.10112	10.7817	1.54022	0.771933	6.43677	2.68634
	IRF7	4.10112	6.73856	0	1.54387	7.02113	2.8117
	MTX1	4.10112	16.1725	2.05363	0.771933	7.17509	2.843
	MTMR10	4.10112	8.08627	1.54022	0	7.91275	2.98418
	TMEM53	4.10112	6.73856	1.02681	0	10.5566	3.40007
	CEACAM19	4.10112	1.34771	0.513407	0	10.6131	3.40777
	SLIT2	4.10112	1.34771	0.513407	0	10.6131	3.40777
	ZNF792	4.10112	6.73856	0	0.771933	14.0423	3.8117
	FRS3	4.10112	9.43398	0.513407	0	26.3633	4.72046
	DUSP22	4.10112	14.8248	0.513407	0	36.8634	5.20412

## Sheet: Low transferred Set 3
	Gene ID	Mouse_ Cocul_1 (RPM)	Mouse_Cocul_2 (RPM)	Mouse_Mix_1 (RPM)	Mouse_Mix_2 (RPM)	FC	log2FC
	SHQ1	8.20225	12.1294	6.67429	17.7545	0.832283	-0.264853
	TPRKB	8.20225	8.08627	8.21452	10.0351	0.892539	-0.164014
	DDIT3	8.20225	6.73856	2.56704	13.1229	0.952256	-0.0705786
	GPX3	8.20225	6.73856	7.1877	7.71933	1.00227	0.00326451
	TANGO6	8.20225	4.04313	3.59385	8.49127	1.01326	0.0190062
	ZKSCAN4	8.20225	0	2.56704	5.40353	1.02907	0.0413362
	ARL16	8.20225	2.69542	4.62067	5.40353	1.08714	0.120533
	CSGALNACT1	8.20225	17.5203	11.8084	11.579	1.09985	0.137301
	COL4A2	8.20225	12.1294	11.8084	6.17547	1.13055	0.177027
	TMBIM1	8.20225	5.39085	6.67429	4.6316	1.2023	0.265799
	HOXA5	8.20225	2.69542	5.13407	3.85967	1.2117	0.277027
	PLD2	8.20225	4.04313	3.08044	6.9474	1.22114	0.288226
	GID4	8.20225	5.39085	4.10726	6.9474	1.22963	0.298219
	PLCE1	8.20225	1.34771	1.54022	6.17547	1.23773	0.307699
	PAPOLG	8.20225	9.43398	5.64748	8.49127	1.24737	0.318888
	SRGN	8.20225	4.04313	3.59385	6.17547	1.25345	0.325908
	NRBF2	8.20225	4.04313	5.64748	3.85967	1.28802	0.365153
	ANKMY1	8.20225	8.08627	4.10726	8.49127	1.29289	0.3706
	SPC25	8.20225	4.04313	4.62067	4.6316	1.3235	0.404359
	CLP1	8.20225	2.69542	3.59385	4.6316	1.32487	0.405853
	PCLAF	8.20225	2.69542	3.59385	4.6316	1.32487	0.405853
	PHRF1	8.20225	18.868	8.72792	11.579	1.33305	0.414734
	ZEB2	8.20225	9.43398	7.70111	5.40353	1.3458	0.428464
	ETV6	8.20225	5.39085	3.08044	6.9474	1.35554	0.438862
	HES6	8.20225	4.04313	6.67429	2.3158	1.3621	0.44583
	CBS	8.20225	2.69542	4.10726	3.85967	1.36786	0.451925
	EXOSC7	8.20225	10.7817	7.70111	6.17547	1.36806	0.452128
	PLPP5	8.20225	9.43398	5.13407	7.71933	1.37211	0.456391
	SRRD	8.20225	9.43398	5.13407	7.71933	1.37211	0.456391
	APOBEC3B	8.20225	1.34771	3.08044	3.85967	1.37605	0.460536
	LONRF1	8.20225	1.34771	4.62067	2.3158	1.37678	0.461294
	STIM1	8.20225	14.8248	5.13407	11.579	1.37779	0.462354
	ABCA7	8.20225	6.73856	3.08044	7.71933	1.38344	0.468256
	FAH	8.20225	5.39085	6.67429	3.08773	1.39245	0.477621
	NNMT	8.20225	9.43398	5.64748	6.9474	1.40027	0.485705
	HACE1	8.20225	2.69542	3.08044	4.6316	1.41307	0.498835
	SLC16A3	8.20225	10.7817	7.1877	6.17547	1.42062	0.506517
	PRKAR2B	8.20225	1.34771	2.05363	4.6316	1.42852	0.514517
	COCH	8.20225	5.39085	4.10726	5.40353	1.42923	0.515236
	PHLDA2	8.20225	5.39085	4.10726	5.40353	1.42923	0.515236
	GPRC5B	8.20225	9.43398	5.13407	6.9474	1.45977	0.545746
	TNFRSF10D	8.20225	4.04313	3.59385	4.6316	1.48872	0.574071
	ABHD18	8.20225	6.73856	4.62067	5.40353	1.49047	0.575771
	BIRC3	8.20225	10.7817	5.64748	6.9474	1.50727	0.591942
	ITPRIP	8.20225	8.08627	6.16089	4.6316	1.50925	0.593828
	ZNF655	8.20225	8.08627	6.16089	4.6316	1.50925	0.593828
	GNB4	8.20225	12.1294	4.10726	9.2632	1.52064	0.604678
	MRPL40	8.20225	9.43398	6.16089	5.40353	1.52504	0.608849
	DTX3	8.20225	8.08627	3.59385	6.9474	1.54522	0.627809
	ANKRD36	8.20225	1.34771	3.08044	3.08773	1.54826	0.63065
	TRMT44	8.20225	1.34771	6.16089	0	1.55009	0.632356
	ADGRL2	8.20225	2.69542	1.54022	5.40353	1.56942	0.650232
	TP73	8.20225	2.69542	3.08044	3.85967	1.57024	0.650989
	ZNF511	8.20225	2.69542	4.62067	2.3158	1.57107	0.651747
	GLCCI1	8.20225	12.1294	6.67429	6.17547	1.58226	0.661986
	ANKRD33B	8.20225	8.08627	4.10726	6.17547	1.58407	0.663633
	ATAD5	8.20225	13.4771	6.67429	6.9474	1.59153	0.670416
	GPATCH11	8.20225	6.73856	3.08044	6.17547	1.61419	0.690811
	SCRN3	8.20225	8.08627	4.62067	5.40353	1.62492	0.700368
	AGPS	8.20225	8.08627	6.16089	3.85967	1.62551	0.700893
	LRP1	8.20225	4.04313	5.13407	2.3158	1.6437	0.71695
	ZNF593	8.20225	12.1294	3.08044	9.2632	1.64714	0.719959
	GGT1	8.20225	12.1294	7.70111	4.6316	1.6486	0.721238
	ATP10A	8.20225	5.39085	5.13407	3.08773	1.6533	0.725347
	CHST3	8.20225	13.4771	4.62067	8.49127	1.65341	0.725442
	B4GAT1	8.20225	8.08627	5.13407	4.6316	1.66794	0.738064
	UTP15	8.20225	21.5634	4.62067	13.1229	1.67755	0.746354
	RUSC2	8.20225	12.1294	6.67429	5.40353	1.68339	0.751366
	CCNJ	8.20225	14.8248	6.67429	6.9474	1.69047	0.757425
	EVI5	8.20225	2.69542	2.56704	3.85967	1.69569	0.761869
	IKZF4	8.20225	5.39085	4.10726	3.85967	1.70619	0.770779
	ZNF44	8.20225	6.73856	4.10726	4.6316	1.7097	0.773741
	RAD51	8.20225	10.7817	5.64748	5.40353	1.71785	0.780601
	TRAF3IP2	8.20225	10.7817	5.64748	5.40353	1.71785	0.780601
	LANCL2	8.20225	17.5203	7.1877	7.71933	1.72553	0.787037
	EXO1	8.20225	21.5634	7.1877	10.0351	1.72827	0.789325
	PYCR2	8.20225	12.1294	3.08044	8.49127	1.75701	0.813125
	COQ10A	8.20225	8.08627	4.62067	4.6316	1.76049	0.815977
	SNRK	8.20225	6.73856	3.08044	5.40353	1.76106	0.816445
	LRP11	8.20225	8.08627	6.16089	3.08773	1.76118	0.816545
	SLC18B1	8.20225	6.73856	4.62067	3.85967	1.76182	0.817065
	LYRM4	8.20225	5.39085	4.62067	3.08773	1.76341	0.818371
	DPH6	8.20225	2.69542	3.08044	3.08773	1.76676	0.821104
	ADAT2	8.20225	1.34771	3.08044	2.3158	1.76974	0.823539
	NOMO3	8.20225	13.4771	3.59385	8.49127	1.79389	0.843091
	DENND3	8.20225	12.1294	2.05363	9.2632	1.79659	0.845258
	RIOK2	8.20225	12.1294	5.13407	6.17547	1.79774	0.846187
	GINS3	8.20225	10.7817	6.67429	3.85967	1.80217	0.849731
	NFKBIE	8.20225	5.39085	2.05363	5.40353	1.82282	0.866175
	DAGLB	8.20225	14.8248	4.10726	8.49127	1.82776	0.870076
	TMEM216	8.20225	4.04313	5.13407	1.54387	1.83371	0.874763
	CPNE7	8.20225	8.08627	4.10726	4.6316	1.86392	0.898339
	ETNK2	8.20225	8.08627	4.10726	4.6316	1.86392	0.898339
	HSCB	8.20225	8.08627	4.10726	4.6316	1.86392	0.898339
	SLC8B1	8.20225	8.08627	5.64748	3.08773	1.8647	0.89894
	PODXL	8.20225	21.5634	6.67429	9.2632	1.86765	0.901223
	SOX2	8.20225	4.04313	1.02681	5.40353	1.90431	0.929269
	CCNO	8.20225	4.04313	2.56704	3.85967	1.90539	0.930087
	ETV4	8.20225	9.43398	4.62067	4.6316	1.90615	0.930663
	PPP2R3A	8.20225	9.43398	4.62067	4.6316	1.90615	0.930663
	HAUS2	8.20225	14.8248	6.67429	5.40353	1.90656	0.93097
	KCNAB2	8.20225	8.08627	3.08044	5.40353	1.91992	0.941043
	CES1	8.20225	8.08627	4.62067	3.85967	1.92074	0.941663
	PSMB8	8.20225	2.69542	1.02681	4.6316	1.92592	0.94555
	TEX30	8.20225	2.69542	1.02681	4.6316	1.92592	0.94555
	TEFM	6.15168	6.73856	2.05363	4.6316	1.92817	0.947231
	SOCS7	6.15168	6.73856	3.59385	3.08773	1.92922	0.948017
	THTPA	6.15168	6.73856	3.59385	3.08773	1.92922	0.948017
	MTMR9	8.20225	6.73856	1.54022	6.17547	1.93642	0.953391
	METTL2B	8.20225	6.73856	3.08044	4.6316	1.93733	0.954073
	LAMB3	6.15168	10.7817	4.10726	4.6316	1.93771	0.954353
	ZNF555	6.15168	1.34771	0	3.85967	1.94302	0.958298
	VGLL3	8.20225	10.7817	5.13407	4.6316	1.94395	0.958988
	SQOR	6.15168	1.34771	3.08044	0.771933	1.94669	0.961026
	ZNF343	6.15168	1.34771	3.08044	0.771933	1.94669	0.961026
	AVEN	6.15168	5.39085	2.05363	3.85967	1.95196	0.964925
	DSE	6.15168	5.39085	2.05363	3.85967	1.95196	0.964925
	KIRREL1	6.15168	5.39085	2.05363	3.85967	1.95196	0.964925
	METAP1D	8.20225	1.34771	2.56704	2.3158	1.95582	0.967775
	ZNF589	6.15168	9.43398	5.64748	2.3158	1.95719	0.968785
	THSD7A	8.20225	5.39085	3.08044	3.85967	1.95863	0.969843
	ZC3HC1	8.20225	5.39085	3.08044	3.85967	1.95863	0.969843
	ACACB	8.20225	5.39085	4.62067	2.3158	1.95966	0.970601
	TYW5	8.20225	9.43398	5.13407	3.85967	1.96094	0.971549
	ZNF672	8.20225	12.1294	5.64748	4.6316	1.97796	0.984016
	WHRN	6.15168	4.04313	3.59385	1.54387	1.98431	0.988637
	TRAPPC2	8.20225	4.04313	3.08044	3.08773	1.98525	0.989322
	WDR53	8.20225	0	2.56704	1.54387	1.99524	0.996564
	GPAT3	8.20225	17.5203	6.67429	6.17547	2.00179	1.00129
	SLIT3	8.20225	6.73856	3.59385	3.85967	2.00453	1.00326
	COL4A1	6.15168	6.73856	2.56704	3.85967	2.00573	1.00413
	C1orf35	8.20225	20.2157	5.64748	8.49127	2.00993	1.00715
	TBC1D24	8.20225	16.1725	5.13407	6.9474	2.01753	1.01259
	CYP2R1	8.20225	2.69542	1.54022	3.85967	2.01813	1.01302
	PLGRKT	8.20225	2.69542	3.08044	2.3158	2.01949	1.01399
	HSF2	6.15168	9.43398	3.08044	4.6316	2.02095	1.01503
	PSG9	6.15168	2.69542	0.513407	3.85967	2.02309	1.01656
	LRRC23	6.15168	2.69542	2.05363	2.3158	2.02477	1.01776
	TTC26	6.15168	2.69542	2.05363	2.3158	2.02477	1.01776
	FANCE	8.20225	8.08627	4.10726	3.85967	2.04452	1.03176
	XPNPEP3	8.20225	13.4771	5.13407	5.40353	2.05733	1.04078
	ST3GAL2	6.15168	10.7817	3.59385	4.6316	2.05866	1.0417
	HAVCR1	6.15168	10.7817	5.13407	3.08773	2.05957	1.04234
	CRADD	8.20225	16.1725	5.64748	6.17547	2.06165	1.0438
	FGFR4	6.15168	13.4771	5.64748	3.85967	2.06464	1.04589
	CARF	8.20225	4.04313	2.05363	3.85967	2.07082	1.0502
	TBP	8.20225	4.04313	3.59385	2.3158	2.0721	1.05109
	GK	8.20225	6.73856	2.56704	4.6316	2.0755	1.05346
	PLK3	8.20225	6.73856	2.56704	4.6316	2.0755	1.05346
	ZNF611	8.20225	6.73856	2.56704	4.6316	2.0755	1.05346
	LGALSL	8.20225	6.73856	4.10726	3.08773	2.07656	1.05419
	PMAIP1	8.20225	6.73856	4.10726	3.08773	2.07656	1.05419
	BORCS5	6.15168	4.04313	2.56704	2.3158	2.08789	1.06204
	CITED4	6.15168	4.04313	2.56704	2.3158	2.08789	1.06204
	KCTD7	6.15168	4.04313	2.56704	2.3158	2.08789	1.06204
	SH3D21	6.15168	4.04313	2.56704	2.3158	2.08789	1.06204
	APBB3	6.15168	6.73856	1.54022	4.6316	2.08856	1.06251
	C12orf4	6.15168	6.73856	3.08044	3.08773	2.0898	1.06336
	PKN3	6.15168	6.73856	3.08044	3.08773	2.0898	1.06336
	ALKBH4	8.20225	8.08627	1.54022	6.17547	2.11109	1.07799
	RNF223	8.20225	8.08627	1.54022	6.17547	2.11109	1.07799
	TAMM41	8.20225	5.39085	4.10726	2.3158	2.1163	1.08154
	CCDC88A	6.15168	16.1725	5.13407	5.40353	2.11853	1.08306
	LIN28B	8.20225	2.69542	3.59385	1.54387	2.12111	1.08482
	TIGD6	8.20225	2.69542	3.59385	1.54387	2.12111	1.08482
	ZC3H12A	8.20225	17.5203	5.13407	6.9474	2.12909	1.09023
	TUBB2A	6.15168	8.08627	2.05363	4.6316	2.12976	1.09069
	CTU1	6.15168	8.08627	3.59385	3.08773	2.13092	1.09148
	NEXMIF	6.15168	5.39085	1.54022	3.85967	2.13755	1.09596
	LRRK1	8.20225	9.43398	3.59385	4.6316	2.1441	1.10038
	THAP1	8.20225	6.73856	3.08044	3.85967	2.15282	1.10623
	MYRF	6.15168	12.1294	3.08044	5.40353	2.15478	1.10754
	TOMM40L	8.20225	10.7817	2.56704	6.17547	2.17145	1.11866
	MELTF	8.20225	10.7817	4.10726	4.6316	2.17236	1.11926
	ARID3A	6.15168	6.73856	2.05363	3.85967	2.17987	1.12425
	CDC42EP3	6.15168	20.2157	5.13407	6.9474	2.18246	1.12596
	BIN1	8.20225	8.08627	2.05363	5.40353	2.18428	1.12716
	IMPA1	8.20225	8.08627	3.59385	3.85967	2.18535	1.12786
	RPS6KA5	8.20225	5.39085	1.54022	4.6316	2.20244	1.13911
	SPRY4	6.15168	4.04313	1.54022	3.08773	2.20288	1.13939
	MED31	6.15168	4.04313	3.08044	1.54387	2.20461	1.14053
	NDUFA9	6.15168	4.04313	3.08044	1.54387	2.20461	1.14053
	SYNPO2	6.15168	4.04313	3.08044	1.54387	2.20461	1.14053
	ZMYM6	6.15168	4.04313	3.08044	1.54387	2.20461	1.14053
	MAPK11	6.15168	14.8248	4.10726	5.40353	2.20555	1.14114
	SLCO3A1	8.20225	9.43398	1.02681	6.9474	2.21166	1.14513
	APLP1	6.15168	12.1294	3.59385	4.6316	2.2225	1.15219
	TMEM242	8.20225	6.73856	2.05363	4.6316	2.2349	1.16021
	WDR5B	8.20225	6.73856	3.59385	3.08773	2.23612	1.161
	ZNF549	6.15168	5.39085	0.513407	4.6316	2.24344	1.16571
	PRRG4	6.15168	9.43398	1.54022	5.40353	2.24456	1.16643
	FBXL2	6.15168	1.34771	2.56704	0.771933	2.24602	1.16737
	FUZ	6.15168	1.34771	2.56704	0.771933	2.24602	1.16737
	ANOS1	8.20225	8.08627	4.10726	3.08773	2.26387	1.17879
	NUBPL	8.20225	8.08627	4.10726	3.08773	2.26387	1.17879
	METTL23	6.15168	10.7817	3.59385	3.85967	2.27186	1.18388
	LRRC28	6.15168	10.7817	4.10726	3.08773	2.3535	1.2348
	ZNF101	6.15168	12.1294	3.08044	4.6316	2.37046	1.24517
	HMGN5	6.15168	6.73856	1.54022	3.85967	2.38713	1.25528
	HAUS8	6.15168	13.4771	5.13407	3.08773	2.38741	1.25544
	ACER2	6.15168	8.08627	2.05363	3.85967	2.40779	1.26771
	WDPCP	6.15168	1.34771	3.08044	0	2.43452	1.28364
	PHLDB2	6.15168	10.7817	4.62067	2.3158	2.44121	1.2876
	MAK16	6.15168	21.5634	6.67429	4.6316	2.45138	1.2936
	ZNF239	6.15168	14.8248	3.08044	5.40353	2.47249	1.30596
	CDC26	6.15168	4.04313	1.02681	3.08773	2.47775	1.30903
	DNASE1L2	6.15168	4.04313	1.02681	3.08773	2.47775	1.30903
	ZRANB3	6.15168	4.04313	1.02681	3.08773	2.47775	1.30903
	HPDL	6.15168	4.04313	4.10726	0	2.48215	1.31159
	MORN2	6.15168	6.73856	3.59385	1.54387	2.50894	1.32708
	ANKRD49	6.15168	9.43398	1.54022	4.6316	2.52529	1.33645
	LUZP2	6.15168	9.43398	3.08044	3.08773	2.52679	1.3373
	MAP4K2	6.15168	17.5203	4.62067	4.6316	2.5585	1.3553
	PRADC1	6.15168	13.4771	3.59385	3.85967	2.6335	1.39698
	SLC2A6	6.15168	8.08627	1.54022	3.85967	2.63671	1.39874
	MLLT11	6.15168	9.43398	3.59385	2.3158	2.63732	1.39908
	GTPBP8	6.15168	6.73856	2.56704	2.3158	2.63991	1.40049
	ARHGEF35	6.15168	6.73856	4.10726	0.771933	2.64188	1.40157
	RASSF2	6.15168	5.39085	3.59385	0.771933	2.64386	1.40265
	NAT1	6.15168	1.34771	2.05363	0.771933	2.65413	1.40824
	TRMT11	6.15168	13.4771	2.56704	4.6316	2.72674	1.44718
	UBXN11	6.15168	12.1294	3.59385	3.08773	2.73604	1.45209
	CDKN2AIP	6.15168	9.43398	2.56704	3.08773	2.7562	1.46268
	C18orf54	6.15168	8.08627	2.05363	3.08773	2.7693	1.46952
	ZNF615	6.15168	8.08627	3.59385	1.54387	2.77126	1.47054
	BHLHE41	6.15168	6.73856	1.54022	3.08773	2.7853	1.47783
	MON1A	6.15168	6.73856	1.54022	3.08773	2.7853	1.47783
	ABHD17B	6.15168	6.73856	3.08044	1.54387	2.7875	1.47897
	ZNF708	6.15168	5.39085	2.56704	1.54387	2.80778	1.48943
	TAPBPL	6.15168	4.04313	0.513407	3.08773	2.831	1.50131
	SLC7A7	6.15168	8.08627	2.56704	2.3158	2.91592	1.54395
	EDARADD	6.15168	1.34771	2.56704	0	2.92142	1.54667
	BLOC1S5	6.15168	6.73856	2.05363	2.3158	2.9501	1.56076
	CCDC15	6.15168	6.73856	2.05363	2.3158	2.9501	1.56076
	CWC25	6.15168	6.73856	2.05363	2.3158	2.9501	1.56076
	FERMT1	6.15168	6.73856	2.05363	2.3158	2.9501	1.56076
	RASGEF1A	6.15168	6.73856	2.05363	2.3158	2.9501	1.56076
	PACRGL	6.15168	5.39085	1.54022	2.3158	2.99338	1.58177
	SLC35B3	6.15168	10.7817	2.56704	3.08773	2.99453	1.58233
	GPR157	6.15168	9.43398	2.05363	3.08773	3.03143	1.6
	FAM133A	6.15168	4.04313	2.56704	0.771933	3.05328	1.61036
	SPIN2B	6.15168	4.04313	2.56704	0.771933	3.05328	1.61036
	TBC1D8B	6.15168	4.04313	2.56704	0.771933	3.05328	1.61036
	FBXO6	6.15168	8.08627	1.54022	3.08773	3.07651	1.6213
	PLAU	6.15168	12.1294	2.05363	3.85967	3.09152	1.62832
	SMIM3	6.15168	6.73856	1.02681	3.08773	3.13285	1.64747
	OSBP2	6.15168	9.43398	1.02681	3.85967	3.18955	1.67335
	ISY1	6.15168	9.43398	2.56704	2.3158	3.19193	1.67443
	PEX12	6.15168	9.43398	2.56704	2.3158	3.19193	1.67443
	CRISPLD2	6.15168	16.1725	1.54022	5.40353	3.21501	1.68482
	ZNF726	6.15168	8.08627	2.05363	2.3158	3.25854	1.70423
	SLC25A51	6.15168	4.04313	3.08044	0	3.30953	1.72663
	ZNF493	6.15168	6.73856	1.54022	2.3158	3.34289	1.74109
	HRK	6.15168	6.73856	3.08044	0.771933	3.34605	1.74246
	RPH3AL	6.15168	0	1.02681	0.771933	3.41998	1.77399
	COX18	6.15168	5.39085	2.56704	0.771933	3.45691	1.78948
	PLEKHN1	6.15168	9.43398	2.05363	2.3158	3.56698	1.8347
	SLC33A1	6.15168	9.43398	2.05363	2.3158	3.56698	1.8347
	KATNAL1	6.15168	6.73856	2.05363	1.54387	3.58312	1.84121
	PLAGL1	6.15168	6.73856	2.05363	1.54387	3.58312	1.84121
	SAMD9	6.15168	10.7817	3.08044	1.54387	3.66182	1.87256
	RNF157	6.15168	8.08627	1.54022	2.3158	3.69239	1.88456
	ZNF691	6.15168	8.08627	1.54022	2.3158	3.69239	1.88456
	VPS33A	6.15168	8.08627	3.08044	0.771933	3.69589	1.88592
	LRRC37B	6.15168	5.39085	3.08044	0	3.74704	1.90575
	EEPD1	6.15168	9.43398	2.56704	1.54387	3.7913	1.92269
	FIBCD1	6.15168	17.5203	3.08044	3.08773	3.83775	1.94026
	RALGPS1	6.15168	6.73856	1.02681	2.3158	3.85634	1.94723
	SEMA4F	6.15168	12.1294	1.54022	3.08773	3.95014	1.98191
	FLVCR1	6.15168	12.1294	3.08044	1.54387	3.95326	1.98304
	VAT1L	6.15168	8.08627	0.513407	3.08773	3.95373	1.98322
	MORN1	6.15168	9.43398	1.54022	2.3158	4.0419	2.01503
	ZCCHC7	6.15168	13.4771	1.54022	3.08773	4.24136	2.08453
	ACOT4	6.15168	8.08627	1.02681	2.3158	4.25953	2.09069
	BMT2	6.15168	8.08627	2.56704	0.771933	4.26418	2.09227
	LYPD3	6.15168	5.39085	2.56704	0	4.49644	2.16878
	MNX1	6.15168	5.39085	2.56704	0	4.49644	2.16878
	CDC14B	6.15168	6.73856	0.513407	2.3158	4.55613	2.18781
	FOXO6	6.15168	6.73856	0.513407	2.3158	4.55613	2.18781
	BTN2A2	6.15168	6.73856	2.05363	0.771933	4.56201	2.18967
	CCDC167	6.15168	6.73856	2.05363	0.771933	4.56201	2.18967
	LIN7B	6.15168	8.08627	1.54022	1.54387	4.61658	2.20683
	CYBA	6.15168	10.7817	2.05363	1.54387	4.70699	2.2348
	TLE4	6.15168	9.43398	1.54022	1.54387	5.05357	2.3373
	NKX3-1	6.15168	6.73856	1.54022	0.771933	5.57499	2.47897
	CCDC121	6.15168	6.73856	0.513407	1.54387	6.26569	2.64747
	KLF12	6.15168	10.7817	1.02681	1.54387	6.58712	2.71965
	ASRGL1	6.15168	9.43398	2.05363	0	7.58933	2.92397
	EXD3	6.15168	8.08627	1.02681	0.771933	7.91548	2.98468
	TMBIM4	6.15168	6.73856	0	1.54387	8.34932	3.06166
	ASTE1	6.15168	9.43398	1.02681	0.771933	8.66473	3.11515
	MIPOL1	6.15168	8.08627	1.54022	0	9.24409	3.20853
	SPTBN4	6.15168	8.08627	1.54022	0	9.24409	3.20853
	MMACHC	6.15168	6.73856	0.513407	0.771933	10.0287	3.32606
	GRK5	6.15168	5.39085	1.02681	0	11.2411	3.49071
	GFI1	6.15168	2.69542	0	0.771933	11.461	3.51866
	ZNF333	6.15168	8.08627	0	0.771933	18.4445	4.20512
	LTBP2	6.15168	4.04313	0.513407	0	19.8572	4.31159
	FAM135A	6.15168	2.69542	0	0	-	-
